# Supplementary material for: Insights from Characterizing Extinct Human Gut Microbiomes
Source: PLoS One. 2012 Dec 12;7(12):e51146. doi: 10.1371/journal.pone.0051146 (PMC3521025; doi:10.1371/journal.pone.0051146)
Supplement: Table S1 — QIIME 1.3.0 taxonomic assignments in detail. (XLSX) [file pone.0051146.s001.xlsx]

## Sheet: Sheet1
Table 1. QIIME 1.3.0 taxonomic assignments in detail.
OTUs	BE04	BE21	CA10	CA18	ZA04	ZA23	EX2&3	Humans	Primates	Confidence value	Taxonomy assignment	Sequence
0	0	0	0	0	0	0	1	0	0	0.87	Root;Bacteria	GCGCGTAAATTGCCCAATGCCAAAAAACTTGGTGAGGCAGCGAAAAGAAATAGGCCTCCTTAACACCTCACGGTGTTTGGGAGATTCCAATGGGGGGATATTTAAACCCATCGAATATCGAGTAACAATTGGAGGACAAGCCTGGT
1	0	0	0	0	3	0	0	0	0	0.86	Root;Bacteria;Proteobacteria	TGGGGAATTTTGGACAATGGGGGAGACCCTGATCCAGCAATGCCGCGTGAGTGAAGAAGGCCTTCGGGTTGTAAAGCTCTTTCGCTTAGGAAGAAAAGCTTTTATATGAATAGTGTAGAAGTATGACGGTACTAAGAGAAGAAGCACCGGCTAACTACGT
2	0	0	0	0	0	0	0	0	1	0.97	Root;Bacteria;Bacteroidetes	GGAGGAATATTGGTCAATGGGCGGAAGCCTGAACCATCCCAGTACCGTGCAGGACGACGGACCTATGGGTTGTAAACTGCTTTTATGCTGAGATAAAAAGAGCCAAGTATGGCCTTTTGCAGGTACCGCATGAATAACGACCGGCTAATTCCGCC
3	0	0	0	0	0	0	2	0	0	0.89	Root;Bacteria;Proteobacteria;Gammaproteobacteria;Pseudomonadales;Moraxellaceae;Acinetobacter	TGGGGAATATTGGACAATGGGGGGAACCCTGATCCAGCCATGCCGCGTGTGTGAAGAAGGCCTTTTGGTTGTAAAGCACTTTAAGCGAGGAGGAGGCGCTCTAGGTTAATACCCTAGATGCGTGGACGTTACTCGCAGAATAAGCACCGGCTAACTCTGT
4	0	0	1	0	0	0	0	0	0	1	Root	GCGCGCAAATTACCCAATCCCGACACGGGGAGGTAGTGACAATAAATAACAATACAGGCGCTCGATAAGAGTCTTGTAATTGGAATGAGTACAATTTAAACCCCTTAACGAGTAACAATTGGAGGGCAAGTCTGGT
5	0	0	0	0	0	0	0	0	1	0.95	Root;Bacteria	TGGAGAATTTTGCGCAATAGGGGCAACCGTGACGCAACAACGCCGCGTTCGGGACGATGGCCTTTGGATTATAAACCTCTTTCAGCAGGGAAGAACCTATGACGGTACTTGCAGAAGAAGCCCCGGCTAACTACGT
6	0	0	0	0	0	0	0	0	1	0.87	Root;Bacteria;Firmicutes;"Clostridia";Clostridiales	TGGGGAATATTGCACAATGGGCGAAAGCCGGATGCAGTAACGCCGTGTGAGCGATGAAGGCATTGGGGTAAGTAAAGCTCTGTCCTCAAGGAAGATAATGACGGTACATGAGGAGGAAGCCCCGGCTAACTACGT
7	0	0	0	0	881	363	0	0	66	0.92	Root;Bacteria;Bacteroidetes;Bacteroidetes;Bacteroidales;Prevotellaceae;Prevotella	TGAGGAATATTGGTCAATGGACGAGAGTCTGAACCAGCCAAGTAGCGTGCAGGATGACGGCCCTATGGGTTGTAAACTGCTTTTATAAGGGAATAAAGTGAGTCTCGTGAGACTTTTTGCATGTACCTTATGAATAAGGACCGGCTAATTCCGT
8	0	0	0	0	2	0	0	0	0	0.97	Root;Bacteria	TGAGGAATATTGGACAATGGATGGAAATCTGATCCAGCCATGCCGCGTGGAGGAAGAAGGTCCTATGGATTGTAAACTTCTTTTGTACGGGAGCAATAAGGGTCATGAATGGCTTGATGAGAGTACCGTACGAATAAGCATCGGCTAACTCCGT
9	0	0	0	0	0	1	0	0	0	0.97	Root;Bacteria;Firmicutes;"Bacilli";"Lactobacillales";"Carnobacteriaceae";"Carnobacteriaceae 1";Alkalibacterium	TAGGGAATCTTCCACAATGGGCGAAAGCCTGATGGAGCAATACCGCGTGAGTGAAGAAGGTCTTCGGATCGTAAAGCTCTGCTGTTAGAGAAGAACAAGAGGTGTAATAACTGGCACCTCCTTGACGGTATCTAACCAGAAAGTCACGGCTAACTACGT
10	0	0	0	0	0	0	1	0	0	0.98	Root;Bacteria;Proteobacteria;Gammaproteobacteria	TGGGGAATATTGGACAATGGGGGGAACCCTGATCCAGCCATGCCGCGTGTGTGAAGAAGGCCTTCGGGTTGTAAAGTACTTTCAGCGGGGGATGAAGAGAGTAAAGTTAATACCTTTGCTCATTGACGTTACCCGCAGAAGAAGCACCGGCTAACTCCGT
11	0	0	0	0	64	2	0	0	0	0.8	Root;Bacteria;Bacteroidetes;Bacteroidetes;Bacteroidales;Prevotellaceae;Prevotella	TGAGGAATATTGGTCAATGGACGCAAGTCTGAACCAGCCAAGTAGCGTGCAGGAAGACGGCCCTCTGGGTTGTAAACTGCTTTTAGTTGGGAATAAAGTGCACCACGTGTGGTGTTTTGTATGTACCATCAGAAAAAGGACCGGCTAATTCCGT
12	0	0	0	0	0	0	35	0	0	0.95	Root;Bacteria;Proteobacteria;Gammaproteobacteria;Pasteurellales;Pasteurellaceae;Haemophilus	TGGGGAATATTGCGCAATGGGGGGAACCCTGACGCAGCCATGCCGCGTGAATGAAGAAGGCCTTCGGGTTGTAAAGTTCTTTCGGTATTGAGGAAGGTTGATGTGTTAATAGTACATCAAATTGACGTTAAATACAGAAGAAGCACCGGCTAACTCCGT
13	0	0	0	0	0	0	1	0	0	0.94	Root;Bacteria;Bacteroidetes;Flavobacteria;Flavobacteriales;Cryomorphaceae;Fluviicola	TGGGGAATTTTCCGCAATGGGCGCAAGCCTGAACCAGCCATGCCGCGTGCAGGAAGACGGTCCTATGGATTGTAAACTGCTTTTATTTGGGAATAAACCTATCTACGTGTAGATAGCTGAAGGTACCAAATGAATAAGCACCGGCTAACTCCGT
14	0	0	0	0	0	0	34	0	0	0.93	Root;Bacteria;Proteobacteria;Betaproteobacteria;Burkholderiales;Alcaligenaceae	TGGGGAATTTTGGACAATGGGGGCAACCCTGATCCAGCCATCCCGCGTGTGCGATGAAGGCCTTCGGGTTGTAAAGCACTTTTGGCAGGGGAAGAAAAGGCTCGGGATAATACCCTGGGCTCATGACGGTACCTGCAGAATAAGCACCGGCTAACTACGT
15	0	0	0	0	0	0	1	0	0	1	Root;Bacteria;Proteobacteria;Gammaproteobacteria;Enterobacteriales;Enterobacteriaceae	ACGGAGTTAGCCGGTGCTTCTTCTGCGGGTAACGTCAATGAGCAAAGGTATTAACTTTACTCCCTTCCTCCCCGCTGAAAGTACTTTACAACCCGAAGGCCTTCTTCATACACGCGGCATGGCTGCATCAGGCTTGCGCCCATTGTGCAATATTCCCCA
16	0	0	0	0	3	0	0	0	0	0.88	Root;Bacteria;Proteobacteria;Gammaproteobacteria;Pasteurellales;Pasteurellaceae;Haemophilus	TGGGGAATATTGCGCAATGGGGGCAACCCTGACGCAGCCATGCCGCGTGAATGAAGAAGGCCTTCGGGTTGTAAAGTTCTTTCGGTAGCGAGGAAGGCATTTAGTTTAATAGACTAGGTGATTGACGTTAACTACAGAAGAAGCACCGGCTAACTCCGT
17	0	0	0	0	0	0	7	0	0	1	Root;Bacteria;Actinobacteria;Actinobacteria;Actinobacteridae;Actinomycetales	TGGGGAATATTGGACAATGGGCGAAAGCCTGATCCAGCAACGCCGCGTGAGGGATGACGGCCTTCGGGTTGTAAACCTCTTTCAGCAGGGACGAAGCGCAAGTGACGGTACCTGCAGAAGAAGCACCGGCCAACTACGT
18	0	0	0	0	0	1	0	0	0	1	Root;Bacteria	TAGGGAATATTGCACAATGGGCGAAAGCCTGATGCGGCAACGCCGCGTGAGCGATGAAGGCCTTCGGGTCGTAAAGCTCTGTCCTCAAGGAGAATAAAGACAGTACCTGTAGAATAAGCTCCGGCTAACTACGT
19	0	0	0	0	1	0	22	0	0	1	Root;Bacteria;Actinobacteria;Actinobacteria;Actinobacteridae;Actinomycetales	TGGGGAATATTGCACAATGGGCGGAAGCCTGATGCAGCGACGCCGCGTGAGGGATGACGGCCTTCGGGTTGTAAACCTCTTTCAGCAGGGACGAAGCGTAAGTGACGGTACCTGCAGAAGAAGCACCGGCTAACTACGT
20	0	0	0	0	1	0	0	0	0	0.97	Root;Bacteria;Firmicutes;"Clostridia";Clostridiales;"Lachnospiraceae"	TGGGGAATATTGCACAATGGGGGAAACCCTGATGCAGCGACGCCGCGTAAAGGAAGAAGTATCTCGGTATATAAACTTCTATCAGCAGGGAAGATGGTGACGGTACCTGACTAAGAAGCCCCCGACTAACTACGT
21	0	0	0	0	0	0	0	5	0	0.93	Root;Bacteria;Proteobacteria;Betaproteobacteria;Burkholderiales;Oxalobacteraceae	TGGGGAATTTTGGACAATGGGCGCAAGCCTGATCCAGCAATGCCGCGTGAGTGAAGAAGGCCTTCGGGTTGTAAAGCTCTTTTGTCAGGGAAGAAACGGCTGAGGATAATACCTTCGGCTAATGACGGTACCTGAAGAATAAGCACCGGCTAACTACGT
22	0	0	0	0	38	0	0	0	23	1	Root;Bacteria	TGGGGAATATTGCGCAATGGGGGAAACCCTGACGCAGCAACGCCGCGTGATCGAAGAAGGTCTTCGGATTGTAAAGATCTTTTATCAAGGACGAAAAAATGACGGTACTTGATGAATAAGCTCCGGCTAACTACGT
23	0	0	3	3	0	2	76	0	0	0.98	Root;Bacteria;Actinobacteria;Actinobacteria;Actinobacteridae;Actinomycetales;Micrococcineae;Microbacteriaceae	TGGGGAATATTGCACAATGGGCGCAAGCCTGATGCAGCAACGCCGCGTGAGGGACGACGGCCTTCGGGTTGTAAACCTCTTTTAGTAGGGAAGAAGCGAAAGTGACGGTACCTGCAGAAAAAAGCACCGGCTAACTACGT
24	0	0	0	0	0	0	49	0	0	0.98	Root;Bacteria;Proteobacteria;Gammaproteobacteria;Pseudomonadales;Moraxellaceae;Acinetobacter	TGGGGAATATTGGACAATGGGGGGAACCCTGATCCAGCCATGCCGCGTGTGTGAAGAAGGCCTTATGGTTGTAAAGCACTTTAAGCGAGGAGGAGGCTCTCTTGGTTAATACCCAAGATGAGTGGACGTTACTCGCAGAATAAGCACCGGCTAACTCTGT
25	0	0	0	0	2	0	0	0	0	1	Root;Bacteria	TGGGGAATTTTCGGCAATGGGGGGAACCCTGACCGAGCAACGCCGCGTGAACGAAGAAGGCCTTCGGGTCGTAAAGTTTTGTTGTATAGGATGAAAGATGCCTATAGGGAATGATAGGTAAGTGACAGTACTGTACGAGGAAGTCACGGCTAACTACGT
26	0	0	0	0	2	0	0	6	1	1	Root;Bacteria	TGGGGAATATTGCGCAATGGGGGCAACCCTGACGCAGCAACGCCGCGTGCAGGAAGAAGGTCTTCGGATTGTAAACTGTTGTCGCAAGGGAAGAAGACAGTGACGGTACCTTGTGAGAAAGTCACGGCTAACTACGT
27	0	0	0	0	0	0	0	13	0	0.84	Root;Bacteria;Firmicutes;"Clostridia";Clostridiales	TGGGGGATATTGCGCAATGGGGGAAACCCTGACGCAGCAACGCCGCGTGAAGGAAGAAGGCCTTCGGGTTGTAAACTTCTTTAAGTGTGGAAGATAATGACGGTACACACAGAATAAGCCACGGCTAACTACGT
28	0	0	0	0	0	1	0	0	0	1	Root;Bacteria;Bacteroidetes;Bacteroidetes;Bacteroidales	TGAGGAATATTGGTCAATGGACGAGAGTCTGAACCAGCCAAGTAGCGTGCAGGATGACGGCCCTATGGGTTGTAAACTTCTTTTATAAGGGAATAAAACCTTCCACGTGTGGGGGCTTGTATGTACCTTATGAATAAGCATCGGCTAACTCCGT
29	0	0	0	0	2	0	0	0	0	0.97	Root;Bacteria	TGGGGAATCTTCCGCAATGGGCGAAAGCCTGACGGAGCAATGCCGCGTGAATGAAGAAGGCCTTCGGGTCGTAAAATTCTGTCCTTATTGAAGAGAGGTTTTATGTGTAAACAATGCATAAATAGGACGGTAGATAAGGAGGAAGCCCCGGCTAACTACGT
30	0	0	0	0	0	0	0	0	1	1	Root;Bacteria	TGGGGAATATTGCGCAATGGGGGAAACCCTGACGCAGCAACGCCGTGTGCAGGACGAAGGCTTTCGGGTTGTAAACTGCTTTCAGTAGGGAAGATTCAGACGGTACCTACAGAAGAAGCCCCGGCTAAATACGT
31	0	0	0	0	0	1	0	0	0	1	Root;Bacteria	TGGGGAATATTGGGCAATGGGCGCAAGCCTGACCCAGCAACGCCGCGTGAAGGATGAAGGCTTTCGGGTTGTAAACTTCTTTTATCAGGGACGAACAAAGTGACGGTACCTGATGAATAAGCCACGGCTAACTACGT
32	0	0	0	0	0	0	0	0	1	0.83	Root;Bacteria;Bacteroidetes	TGAGGGATATTGGTCAATGGGCGAGAGCCTGAACCAGCCATGTCGCGTGCGGGAGGAAGGCCCTACGGGTCTTAAACCGCTTTTGCGCCGGGATAAAGTGTGGGACTGGTCCCATATTGCAGGTACGGCGCGAATAAGGATCGGCTAACTCCGT
33	0	0	0	0	0	1	0	0	0	0.94	Root;Bacteria;Bacteroidetes	TGAGGAATATTGGTCAATGGGCGAGAGCCTGAACCAGCCAAGTAGCGTGCAGGATGACGCCCCTATGGGTTATAAACTGCTTTTGTTCAAGGGCAAGGCACGGGGTTTCCCGTGTTGAGTGGATTGTTCGAATAAGCACCGGCTAACTACGT
34	0	0	0	0	0	1	0	0	0	0.89	Root;Bacteria;Proteobacteria;Gammaproteobacteria;Oceanospirillales;Halomonadaceae	TGGGGAATATTGGACAATGGGCGCAAGCCTGATCCAGCCATGCCGCGTGTGTGAAGAAGGCTTTCGGGTTGTAAAGCACTTTCAGTGGGGAAGAAGGCCTTGGGGTTAATAACCCCGAGGAAGGACATCACCCACAGAAGAAGCACCGGCTAACTCCGT
35	0	0	0	0	88	0	0	0	0	0.97	Root;Bacteria;Bacteroidetes;Bacteroidetes;Bacteroidales;Prevotellaceae	TGAGGAATATTGGTCAATGGACGAGAGTCTGAACCAGCCAAGTAGCGTGCAGGATGACGGCCCTATGGGTTGTAAACTGCTTTTATAGGGGGATAAAGTGTGCCACGTGTGGCATATTGCAGGTACCCTATGAATAAGGACCGGCTAATTCCGT
36	0	0	0	0	0	1	0	0	0	0.96	Root;Bacteria;Firmicutes;"Bacilli";"Lactobacillales";"Carnobacteriaceae";"Carnobacteriaceae 1";Alkalibacterium	TAGGGAATCTTCCACAATGGGCGAAAGCCTGATGGAGCAATGCCGCGTGAATGAAGAAGGTCTTCGGATCGTAAAGTTCTGTTATCGGAGAAGAACAAGGGATGTAGTAACTGGCATCCCCCCTGACGGTATCCGACCAGAAAGTCACGGCTAACTACGT
37	0	0	0	0	37	0	0	0	6	0.95	Root;Bacteria;Bacteroidetes;Bacteroidetes;Bacteroidales;Prevotellaceae;Prevotella	TGAGGAATATTGGTCAATGGACGAGAGTCTGAACCAGCCAAGTAGCGTGCAGGATGACGGCCCTATGGGTTGTAAACTGCTTTTATGTGGGAATAAAGTCAGGGACGTGTCCCTGTTTGCATGTACCACAAGAATAAGGACCGGCTAATTCCGT
38	0	0	0	0	264	0	0	0	1	1	Root;Bacteria;Spirochaetes;Spirochaetes;Spirochaetales;Spirochaetaceae;Treponema	CTAAGAATATTCCGCAATGGAGGAAACTCTGACGGAGCAACGCCGCGTGGACGATGAAGGCCGGAAGGTTGTAAAGTCCTTTTATAATTGAGGAATAAGCGGGACAGGGAATGGTTCCGTGGTGACTGTAGATTATGAATAAGCACCGGCTAATTACGT
39	0	0	0	0	0	0	2	0	0	0.86	Root;Bacteria;Proteobacteria;Betaproteobacteria;Burkholderiales	TGGGGAATTTTGGACAATGGGCGCAAGCCTGATCCAGCCATGCCGCGTGTGGGAAGAAGGCCTTCGGGTTGTAAACCACTTTTGTCAGGGGAAGAAACGGTCTGGTCTAATAAACCGGACTAATGACGGTACCTGAAGAATAAGCACCGGCTAACTACGT
40	0	0	0	0	0	0	209	0	0	0.99	Root;Bacteria;Proteobacteria;Gammaproteobacteria	TGGGGAATATTGCACAATGGGCGCAAGCCTGATGCAGCCATGCCGCGTGTGTGAAGAAGGCTTTCGGGTTGTAAAGCACTTTCAGCGAGGAGGAAAGGGTATTGCTTAATAGGTAATATCTGTGACGTTACTCGCAGAAGAAGCACCGGCTAACTCCGT
41	0	0	0	0	0	0	0	0	1	0.96	Root;Bacteria	TTAGGAATATTCGTCAATGGGGGAAACCCTGAACGAGCAATGCCGCGTGAACGATGAAGGCCCTATGGGTTGTAAAGTTCTGTTGCATGGGACGAACGGCTAGGATAGGAAATGATCTTAGTGTGACGGTACCATGCCAGAAAGCTCCGGCTAACTACGT
42	0	0	0	0	1	0	0	0	0	0.99	Root;Bacteria;Firmicutes	TAGGGAATTTTCGTCAATGGGGGGAACCCTGAACGAGCAATGCCGCGTGAGTGAGGAAGGTCTTCGGATTGTAAACTCCTGTTGTTGGGGAAGATAATGACGGTACCCAACAAGGAAGTGACGGCTAACTACGT
43	0	3	0	0	0	0	0	0	0	0.87	Root;Bacteria	CGAGGCGGCGGTTCGCCACAGTACCACACCACAGCGCAAAACGGTTCGCCCGCGACAGCACGCTCGGGGGCCAGAAAGCGCGCCGCGAGGTCCCGGGGCCAGTCCAGCAAGCGAGGCGTCAAGGTGGGGGACATCCCGATAGAGGTGTGTCCAGCAGCGGGAGG
44	0	1	0	0	0	0	227	0	0	1	Root;Bacteria;Proteobacteria;Gammaproteobacteria;Pseudomonadales;Moraxellaceae;Acinetobacter	TGGGGAATATTGGACAATGGGGGGAACCCTGATCCAGCCATGCCGCGTGTGTGAAGAAGGCCTTATGGTTGTAAAGCACTTTAAGCGAGGAGGAGGCTACTGAGACTAATACTCTTGGATAGTGGACGTTACTCGCAGAATAAGCACCGGCTAACTCTGT
45	0	0	0	0	0	2	0	0	0	0.95	Root;Bacteria;Bacteroidetes;Bacteroidetes;Bacteroidales;Prevotellaceae;Prevotella	TGAGGAATATTGGTCAATGGGCGAGAGCCTGAACCAGCCAAGTAGCGTGCAGGAAGACGGCCCTATGGGTTGTAAACTGCTTTTATAAGGGAATAAAGTTAGAGTCGTGACTTTATTTGCATGTACCTTATGAATAAGGACCGGCTAATTCCGT
46	0	0	0	0	0	0	0	6	0	0.91	Root;Bacteria;Firmicutes;"Erysipelotrichi";"Erysipelotrichales";Erysipelotrichaceae;Catenibacterium	TAGGGAATTTTTGGCAATGGGGGAAACCCTGACCGAGCAACGCCGCGTGAGCGAAGAAGGCCTTCGGGTCGTAAAGCTCTGTTGTAAAGGAAGAACGGCGCATACAGGAAATGGTATGCGAGTGACGGTACTTTACCAGAAAGCCACGGCTAACTACGT
47	0	0	0	1	0	0	0	0	0	0.8	Root;Bacteria;Firmicutes;"Bacilli";Bacillales;Bacillaceae	TAGGGAATCTTCCGCAATGGACGAAAGTCTGACGGAGCAACGCCGCGTGAGTGACGAAGGTCTTCGGATCGTAAAACTCTGTTGTCAGGGAAGAACAAGCATCGGCCGAATAAGCCGGCGCCTTGACGGTACCTGACCAGAAAGCCCCGGCTAACTACGT
48	0	0	1	0	0	0	0	0	0	0.82	Root;Bacteria;Firmicutes;"Bacilli";Bacillales;Bacillaceae;"Bacillaceae 2"	TAGGGAATCATCCGCAATGGACGAAAGTCTGACGGTGCAACGCCGCGTGAGTGACGAAGGTTTTCGGATCGTAAAACTCTGTTGTTGGGGAAGAACAGGTATCATTCGAATAGGGTGATGCTTTGACGGTACCTAACCAGAAAGCCCCGGCTAACTACGT
49	0	0	0	0	0	1	0	0	0	0.83	Root;Bacteria;Actinobacteria;Actinobacteria;Coriobacteridae;Coriobacteriales;Coriobacterineae;Coriobacteriaceae	TGGGGAATCTTGCGCAATGGGAGCAACCCTGACGCAGCGACGCCGCGTGCGGGATGGAGGCCTTCGGGTCGTAAACCGCTTTCAGCAGGGACGAGCGAGGACGGTACCTGCAGAAGAAGCCCCCGGCTAACTACGT
50	0	0	0	0	0	2	1	0	0	1	Root;Bacteria;Proteobacteria;Gammaproteobacteria;Pseudomonadales;Moraxellaceae;Acinetobacter	TGGGGAATATTGGACAATGGGGGGAACCCTGATCCAGCCATGCCGCGTGTGTGAAGAAGGCCTTTTGGTTGTAAAGCACTTTTAAGCGAGGAGGAGGCTACTCTAGTTAATACCTAGGGATAGTGGACGTTACTCGCAGAATAAGCACCGGCTAACTCTGT
51	0	0	0	0	0	0	0	0	7	0.99	Root;Bacteria	TTAGGAATATTCGTCAATGGGGGAAACCCTGAACGAGCAATGCCGCGTGAGTGATGAAGGCCCTATGGGTTGTAAAACTCTGTTGTATGGGAAGAACGGCTATATTAGGAAATGAATATAGAGTGACGGTACCATACCAGAAAGCTCCGGCTAACTACGT
52	0	0	0	0	0	0	0	0	3	0.82	Root;Bacteria	TAAGGGATATTGGTCAATGGGGGGAACCCTGAACCAGCCATGCCGCGTGAGGGAGTGAGGCCCTACGGGTCGTGAACCTCTTTTGCCGGGGGATAAGGGCGTCCACGCGTGGGCGTTTGAAGGTACCCGGAGAATAAGCATCGGCTAACTCCGT
53	0	0	0	0	0	0	1	0	0	1	Root;Bacteria;Proteobacteria;Gammaproteobacteria	TGGGGAATATTGGACAATGGGCGCAAGCCTGATCCAGCCATGCCGCGTGTGTGAAGAAGGCCTTCGGGTTGTAAAGCACTTTCAGTGGGGAGGAAGGGTGTTGTGTTAATAGCACAGCATTTTGACGTTACCCACAGAAGAAGCACCGGCTAACTCCGT
54	0	0	0	0	0	1	0	0	0	0.95	Root;Bacteria;Actinobacteria;Actinobacteria;Actinobacteridae;Actinomycetales;Corynebacterineae;Corynebacteriaceae;Corynebacterium	TGGGGAATATTGCACAATGGGCGCAAGCCTGATGCAGCGACGCCGCGTGGGGGATGAAGGCCTTCGGGTTGTAAACTCCTTTCGCTATCGACGAAGCCATTTTGTGGTGACGGTAGGTAGATAAGAAGCACCGGCTAACTACGT
55	0	0	0	0	0	3	0	0	0	0.95	Root;Bacteria;Bacteroidetes;Bacteroidetes;Bacteroidales;Prevotellaceae;Prevotella	TGGGGAATATTGGTCAATGGGCGAGAGCCTGAACCAGCCAAGTAGCGTGCAGGATGACGGCCCTATGGGTTGTAAACTGCTTTTATAAGGGAATAAAGTAAGAGTCGAGACTCTTTTTGCATGTACCTTATGAATAAGGACCGGCTAATTCCGT
56	0	0	0	0	0	0	1	0	0	0.97	Root;Bacteria;Proteobacteria;Gammaproteobacteria;Pseudomonadales;Moraxellaceae;Acinetobacter	TGGGGAATATTGGACAATGGGGGGAACCCTGATCCAGCCATGCCGCGTGTGTGAAGAAGGCCTTATGGTTGTAAAGCACTTTAAGCGAGGAGGAGGCTACTGAGACTAATACTCTTGGATAGTGGACGGTACCTGAAGAATAAGCACCGGCTAACTACGT
57	0	0	0	0	0	0	1	0	0	0.8	Root;Bacteria;Proteobacteria;Gammaproteobacteria;Pseudomonadales;Moraxellaceae	TGGGGAATATTGGACAATGGGCGAAAGCCTGATCCAGCAATGCCGCGTGAGTGATGAAGGCCTTAGGGTTGTAAAGCTCTTTAAGCGAGGAGGAGGCTACTGAGACTAATACTCTTGGATAGTGGACGTTACTCGCAGAATAAGCACCGGCTAACTCTGT
58	0	0	0	0	0	1	0	0	0	0.94	Root;Bacteria;Bacteroidetes;Bacteroidetes;Bacteroidales;Prevotellaceae;Prevotella	TGAGGAATAGTGGTCAATGGGCGAGAGCCTGAACCAGCCAAGTAGCGTGCAGGATGACGGCCCTATGGGTTGTAAACTGCTTTTATAAGGGAATAAAGTGGGAGTCGTGACCCTTTTTGCATGTACCTTATGAATAAGGACCGGCTAATTCCGT
59	0	0	0	0	3	0	0	1	2	1	Root;Bacteria	TGGGGAATATTGCACAATGGGGGGAACCCTGATGCAGCGATGCCGCGTGGAGGAAGAAGGTTTTCGGATTGTAAACTCCTTTTAACAGGGACGATAATGACGGTACCTGAAGAAAAAGCTCCGGCTAACTACGT
60	0	0	0	0	2	0	0	5	2	0.96	Root;Bacteria;Firmicutes;"Clostridia";Clostridiales	TGGGGAATATTGCACAATGGAGGAAACTCTGATGCAGCGATGCCGCGTGAGGGAAGAAGGTTTTAGGATTGTAAACCTCTGTCTTCAGGGACGAAAAAAGACGGTACCTGAGGAGGAAGCTCCGGCTAACTACGT
61	0	0	0	0	0	0	1	0	0	0.99	Root;Bacteria;Actinobacteria;Actinobacteria;Actinobacteridae;Actinomycetales	TGGGGAATATTGCACAATGGGCGCAAGCCTGATGCAGCGACGCCGCGTGAGGGATGACGGCCTTCGGGTTGTAAACCTCTTTCAATAGGGACGAAGCGCAAGTGACGGTAATGGGTAAAGAAGCACCGGCTAACTACGT
62	0	0	0	0	0	0	0	0	1	1	Root;Bacteria;Spirochaetes;Spirochaetes;Spirochaetales;Spirochaetaceae;Treponema	CTAAGAATATTCCGCAATGGGGGGAACCCTGACGGAGCGACGCCGCGTGGGCGAGGAAGGCCGGAAGGTTGTAAAGCCCTTTTGCGCGCGAGGAATAAGGGGAGGAGGGAATGCCTTCCCGGTGACTGTAGCGCGCGAATAAGCGCCGGCTAATTACGT
63	0	0	0	0	4	2	0	5	0	1	Root;Bacteria	TGAGGGATATTGGGCAATGGGGGAAACCCTGACCCAGCAACGCCGCGTGAGGGATGACGGTTTTCGGATTGTAAACCTCTGTCCTCTGTGAAGATAGTGACGGTAGCAGAGGAGGAAGCTCCGGCTAACTACGT
64	0	0	0	0	0	1	0	0	0	0.99	Root;Bacteria;Bacteroidetes	TGAGGAATATTGGTCAATGGGCGAGAGCCTGAACCAGCCAAGTAGCGTGCAGGATGACGGCCCTATGGGTTGTAAACTGCTTTTGGCGGGGAGCAAGGCGCTTCTGGCGTTGAGTGTACCCGTCGAATAAGCACCGGCTAACTACGT
65	0	0	0	0	0	0	0	0	2	0.98	Root;Bacteria;Bacteroidetes;Bacteroidetes;Bacteroidales	TGAGGAATATTGGTCAATGGCCGGAAGGCTGAACCAGCCAAGTAGCGTGCAGGACGACGGCCCTACGGGTTGTAAACTGCTTTTATAGGGGAATAAAGTGTGGTACGTGTACCGTTTTGTATGTACCCTATGAATAAGGACCGGCTAATTCCGT
66	0	0	0	0	0	1	0	0	0	0.8	Root;Bacteria;Proteobacteria;Gammaproteobacteria;Chromatiales;Chromatiaceae	TGGGGAATATTGGACAATGGGGGCAACCCTGATCCAGCAATGCCGCGTGGGTGAAGAAGGCCTTCGGGTTGTAAAGCCCTTTCAGTGGGGAAGAAAAGGTCTAGCGTGAAGAGCGTTAGGCGTTGACGTTACCTACAGAAGAAGCACCGGCTAACTCCGT
67	0	0	0	0	25	0	0	13	2	0.99	Root;Bacteria;Firmicutes;"Clostridia";Clostridiales;"Lachnospiraceae"	TGGGGAATATTGCACAATGGGGGGAACCCTGATGCAGCAACGCCGCGTGAGTGAAGAAGTATTTCGGTATGTAAAGCTCTATCAGCAGGGAAGATAATGACGGTACCTGACTAAGAAGCTCCGGCTAAATACGT
68	0	0	0	0	0	1	0	0	0	1	Root;Bacteria	TGGGGAATATTGCACAATGGGCGAAAGCCTGATGCAGCAACGCCGCGTGAGCGATGAAGGCCTTCGGGTTGTAAAGCTCTTTTGTCCGGGACGAACGGCACGGGTAGGAAATGACCTGTGAGTGACGGTACCGGAAGAAAAAGCCACGGCTAACTACGT
69	0	0	0	0	0	0	3	0	0	0.94	Root;Bacteria;Proteobacteria;Gammaproteobacteria	TGGGGAATATTGCACAATGGGCGCAAGCCTGATGCAGCCATGCCGCGTGTATGAAGAAGGCCTTCGGGTTGTAAAGTACTTTAAGCAGTGAAGAAGACTCCGTGGTTAATACCCACGGACGATGACATTAGCTGCAGAATAAGCACCGGCTAACTCTGT
70	0	0	0	0	19	0	0	0	0	1	Root;Bacteria;Bacteroidetes;Bacteroidetes;Bacteroidales	TGAGGAATATTGGTCAATGGCCGAGAGGCTGAACCAGCCAAGTCGCGTGAAGGATGAAGGATCTATGGTTTGTAAACTTCTTTTATACGGGAATAAAGTGAGCCACGTGTGGCTTTTTGTATGTACCGTATGAATAAGCATCGGCTAACTCCGT
71	0	0	0	0	0	0	0	0	1	0.81	Root;Bacteria;Firmicutes;"Erysipelotrichi";"Erysipelotrichales";Erysipelotrichaceae;Erysipelothrix	TAGGGAATTTTCGGCAATGGGCGTAAGCCTGACCGAGCAACGCCGCGTGAGTGAAGACGGCCTTCGGGTTGTAAAGCTCTGTTGTAAGGGAAGAACGGTACGGAGAGAATCCGTAAATGACGGTACCTTACCAGAAAGCCACGGCTAACTACGT
72	0	0	0	0	0	0	0	0	1	0.85	Root;Bacteria;Bacteroidetes	TGAGGAATATTGGTCAATGGGCGGAAGCCTGAACCAGCCAAGTCGCGTGAGGGAAGACGGCCCTACGGGTTGTAAACCTCTTTTGTCGGGGAGCAAATTGGCCACGGGTGGCCAGGCGAGAGTACCCGAAGAAAAAGCATCGGCTAACTCCGT
73	0	0	0	0	0	23	0	0	1	0.85	Root;Bacteria;Firmicutes	TGGGGAATATTGCACAATGGGGGAAACCCTGATGCAGCAACGCCGCGTGAGTGAAGAAGGTTTTCGGATTGTAAAGCTCTGTTAGCAGGGAAGAGGAAGGACGGTACCTGCAGAGGAAGCCACGGCTAACTACGT
74	0	0	3	9	0	0	0	0	0	0.96	Root;Bacteria;Firmicutes;"Bacilli";Bacillales;Bacillaceae	TAGGGAATCTTCCGCAATGGACGCAAGTCTGACGGAGCAACGCCGCGTGAGCGATGAAGGTTTTCGGATCGTAAAACTCTGTTGTTAGGGAAGAACAAGTACCGTTCGAATAGGTCGGTACCTTGACGGTACCTAACCAGAAAGCCCCGGCTAACTACGT
75	0	0	0	0	0	0	0	9	1	1	Root;Bacteria	TGGGGAATATTGGGCAATGGGCGCAAGCCTGACCCAGCAACGCCGCGTGAAGGAAGAAGGCTTTCGGGTTGTAAACTTCTTTTAAGTGGGACGATAATGACGGTACCACTTGAATAAGCTCCGGCTAACTACGT
76	0	0	0	0	0	0	2	0	0	0.83	Root;Bacteria;Proteobacteria;Gammaproteobacteria;Enterobacteriales;Enterobacteriaceae	TGGGGAATATTGCACAATGGGCGCAAGCCTGATGCAGCCATGCCGCGTGTATGAAGAAGGCCTTCGGGTTGTAAAGTACTTTCAGCGGGGAGGAAGGGAGTAAAGTTAATACCTTTGGGCTAATAACTCGGAGGGATGACGGTACCTGAAGAATAAGCACCGGCTAACTACGT
77	0	0	0	0	0	0	0	0	2	0.83	Root;Bacteria;Bacteroidetes	TGAGGAATATTGGTCAATGGCCGAGAGGCTGAACCAGCCAAGTCGCGTGAGGGATGACGGCCCTACGGGTTGTAAACCTCTTTTGTCAGGGAGCAAGGGGCGCCACGTGTGGCGCTGTGAGAGTACCTGAAGAAAAAGCATCGGCTAACTCCGT
78	0	0	0	0	1	0	0	0	0	0.82	Root;Bacteria;Bacteroidetes;Bacteroidetes;Bacteroidales;Prevotellaceae	TGAGGAATATTGGTCAATGGGCGGAAGCCTGAACCAGCCATGCCGCGTGCAGGATGACGGCCCTATGGGTTGTAAACTGCTTTTATAAGGGAATAAAGTGAGCCTCGTGAGGCTTTTTTGCATGTACCTTATGAATAAGGACCGGCTAATTCCGT
79	0	0	0	0	0	0	0	61	9	0.82	Root;Bacteria;Firmicutes;"Clostridia"	TGGGGAATCTTCCGCAATGGGCGAAAGCCTGACGGAGCAACGCCGCGTGAGTGATGACGGCCTTCGGGTTGTAAAGCTCTGTGATCGGGGACGAACGGTCAGCAGACGAATACTCTGCTGAAGTGACGGTACCCGAATAGCAAGCCACGGCTAACTACGT
80	0	0	0	0	0	0	0	0	1	0.95	Root;Bacteria;Bacteroidetes;Bacteroidetes;Bacteroidales;Prevotellaceae;Prevotella	TGAGGAATATTGGTCAATGGGCGGAAGCCTGAACCAGCCAAGTAGCGTGCAGGAAGACGGCCCTACGGGTTGTAAACTGCTTTTATGCGGGGATAAAGTGCGGGACGTGTCCCGCATTGCAGGTACCGCAGGAATAAGGACCGGCTAATTCCGT
81	0	0	0	0	1	0	0	0	0	0.81	Root;Bacteria;Bacteroidetes;Flavobacteria;Flavobacteriales;Flavobacteriaceae	TAAGGAATATTGGACAATGCCCGCAAGGGTGATCCAGCCATGCCGCGTGCAGGAAGACGGCCCTATGGGTTGTAAACTGCTTTTATACCGGAGAAAACCTTCCCTCGTGAGGGGAGCTGATAGTATGGTAAGAATAAGCATCGGCTAACTTCGT
82	0	0	0	0	0	1	0	0	0	0.9	Root;Bacteria;Actinobacteria;Actinobacteria;Actinobacteridae;Actinomycetales	TGGGGAATATTGCACAATGGGCGCAAGCCTGATGCAGCGACGCCGCGTGAGGGACGAAGGCCTTCGGGTTGTAAACCTCTTTCAGCGGGGACGAAGCGAGAGTGACGGTACCCGCAGAAGAAGCACCGGCTAACTACGT
83	0	0	0	0	0	1	0	0	0	0.98	Root;Bacteria;Firmicutes;"Clostridia";Clostridiales	TGGGGAATATTGCACAATGGGGGAAACCCTGATGCAGCGACGCCGCGTGAGCGAAGAAGTATTTCGATATGTAAAGCTCTGTCCTCAAGGAAGATAATGACGGTACTTGAGGAGGAAGCCCCGGCTAACTACGT
84	0	0	0	0	42	8	0	4	4	0.98	Root;Bacteria;Actinobacteria;Actinobacteria;Coriobacteridae;Coriobacteriales;Coriobacterineae;Coriobacteriaceae;Collinsella	TGGGGAATCTTGCGCAATGGGGGGAACCCTGACGCAGCGACGCCGCGTGCGGGACGGAGGCCTTCGGGTCGTAAACCGCTTTCAGCAGGGAAGAGAAAAGACTGTACCTGCAGAAGAAGCCCCGGCTAACTACGT
85	0	0	39	0	0	0	0	0	0	0.95	Root;Bacteria;Firmicutes;"Clostridia";Clostridiales;Incertae Sedis XI	TGGGGAATATTGCACAATGGAGGAAACTCTGATGCAGCGACGTCGCGTGAATGATGAAGGTTTTCGAATCGTAAAGTTCTGTCCTAAGGGACGATAATGACGGTACCTTAGGAGGAAGCCCCGGCTAACTACGT
86	0	0	0	0	0	1	0	0	0	0.96	Root;Bacteria;Firmicutes	TGGGGAATATTGCACAATGGGCGAAAGCCTGATGCAGCAACGCCGCGTGAGCGATGAAGGCCTTCGGGTCGTAAAATTCTGTTGTCAGAGAAGAACGTGCGTGAGAGTAACTGTTCATGTATTGACGGTATCTGACCAGAAAGCCACGGCTAACTACGT
87	0	0	0	0	0	0	0	0	6	0.99	Root;Bacteria	TGAGGAATATTGGTCAATGGGCGGAAGCCTGAACCAGCCATGCCGCGTGCGGGAAGACGGCCCTATGGGCTGTAAACCGCTTTTGCCTGGGGGCAATAAGGGCGCCGAGCGCGTCCGATGAGAGTACCAGGCGAATAAGCATCGGCTAACTCCGT
88	0	0	0	0	0	0	1	0	0	0.93	Root;Bacteria;Proteobacteria;Gammaproteobacteria	TGGGGAATTTTGGACAATGGGCGAAAGCCTGATCCAGCAATGCCGCGTGTGTGAAGAAGGCCTTCGGGTTGTAAAGCACTTTCAGTGGGGAGGAGAGTTTGCGGGTTAAGAGCTTGCTGACGAGACGTTACCCACAGAAGAAGCACCGGCTAACTCCGT
89	0	0	0	0	0	0	0	1	0	0.99	Root;Bacteria;Firmicutes;"Clostridia";Clostridiales;"Lachnospiraceae"	TGGGGAATATTGCACAATGGAGGAAACTCTGATGCAACGACGCCCCGTGAGTGAAGAAGTATTTCGGTATGTAAAGCTCTATCACCAGGGAAGAAAATGACGGTACCTGACTAAGAAGCACCGGCTAAATACGT
90	0	0	0	0	0	0	0	0	55	0.98	Root;Bacteria;Firmicutes;"Bacilli";"Lactobacillales";Lactobacillaceae;Lactobacillus	TAGGGAATCTTCCACAATGGGCGCAAGCCTGATGGAGCAACACCGCGTGAGTGAAGAAGGGTTTCGGCTCGTAAAGCTCTGTTGTTAAAGAAGAACATGCGTGAGAGTAACTGTTCACGCATTGACGGTATTTAACCAGAAAGTCACGGCTAACTACGT
91	0	0	0	0	0	0	0	3	23	0.81	Root;Bacteria;Firmicutes	TGGGGAATATTGCACAATGGGCGAAAGCCTGATGCAGCAACGCCGCGTGAGGGAAGACGGTTTTCGGATTGTAAACCTCTGTTTTCGGTGACGAACAAATGACGGTAACCGAGTAGGAAGCCACGGCTAACTACGT
92	0	0	0	0	0	0	0	2	0	1	Root;Bacteria;Firmicutes;"Clostridia";Clostridiales	TGGGGAATATTGCACAATGGGGGAAACCCTGATGCAGCGACGCCGCGTGAGGGAAGAAGGTTTTCGGATTGTAAACCTCTGTCCTTGGTGACGAAAATGACGGTAGCCAAGGAGGAAGCCACGGCTAACTACGT
93	0	0	0	0	0	1	0	0	0	1	Root;Bacteria	TGGGGAATATTGCACAATGGGCGAAAGCCTGATGCAGCAACGCCGCGTGAGCGATGAAGGCCTTCGGGTCGTAAACTGCTTTTATATGGGGATAAAGTGAGCTACGTGTAGCTTATTGCAGGTACCATATGAATAAGGACCGGCTAATTCCGT
94	0	0	0	0	0	0	0	1	0	0.98	Root;Bacteria;Firmicutes;"Clostridia";Clostridiales;"Lachnospiraceae"	TGGGGAATATTGCACAATGGGGGAAACCCTGATGCAGCGACGCCGCGTGAAGGAAGAAGTATCTCGGTATGTAAACTTCTATCAGCAGGGAAGAAAATGACGGTACCCGAGGAGGAAGCCACGGCTAACTACGT
95	0	0	0	0	0	0	0	1	0	0.88	Root;Bacteria;Firmicutes;"Clostridia";Clostridiales	TGGGGGATATTGCACAATGGGGGGAACCCTGATGCAGCGACGCCGCGTGTGGGGAGACGGTCTTCGGATTGTAAACCACTGTCTTCGGGGACGAATTTATGACGGTACCCGAGGAGGAAGCTCCGGCTAACTACGT
96	0	0	0	0	0	1	0	0	0	0.96	Root;Bacteria	TGAGGAATATTGGTCAATGGCCGCAAGGCTAAACCAGCCAAGCCGCGTGAAGGAAGAAGGTGCTAAGCATCGTAAACTTCTTTTGTCAAGGAACAAAAGGGGCCACGTGTGGCCCTCCGAGGGTACTTGAAGAAAAAGCATCGGCTAACTCCGT
97	0	0	0	0	0	1	0	0	0	1	Root;Bacteria	TGGGGAATATTGGGCAATGGGGGAAACCCTGACCCAGCAACGCCGCGTGAAGGAAGAAGGCCTTCGGGTCGTAAACTTCTTTTAGCAGGGACGAAGGACGTGACGGTACCTGCAGAAAGAGCAACGGCTAACTACGT
98	0	0	0	0	0	0	0	1	0	0.83	Root;Bacteria;Firmicutes;"Clostridia";Clostridiales	TGGGGAATATTGGGCAATGGGGGAAACCCTGACCCAGCAACGCCGCGTGAAGGAAGAAGGCTTTCGGGTTGTAAACTTCTTTTACCAGGGACGAAGGACGTGACGGTACCTGACTAAGAAGCCCCGGCTAACTACGT
99	0	0	0	0	0	0	12	0	0	0.96	Root;Bacteria;Actinobacteria;Actinobacteria	TGGGGAATCTTGCGCAATGGGCGAAAGCCTGACGCAGCAACGCCGCGTGCGGGATGAAGGCCTTCGTGGTTGTAAACCGCTTTCAGCAGGGACGAAAATGACGGTACCTGCAGAAGAAGCCCCGGCTAACTACGT
100	0	0	0	0	0	0	1	0	0	0.98	Root;Bacteria;Proteobacteria;Gammaproteobacteria;Pseudomonadales;Pseudomonadaceae	TGGGGAATTTTCCGCAATGGGCGAAAGCCTGACGGAGCCATGCCGCGTGTGTGAAGAAGGTCTTCGGATTGTAAAGCACTTTAAGTTGGGAGGAAGGGCAGTAAGCTAATACCTTGCTGTTTTGACGTTACCGACAGAATAAGCACCGGCTAACTCTGT
101	0	0	0	0	0	0	0	0	1	1	Root;Bacteria;Firmicutes;"Bacilli";"Lactobacillales";Lactobacillaceae;Lactobacillus	TAGGGAATCTTCCACAATGGACGCAAGTCTGATGGAGCAACGCCGCGTGAGTGAAGAAGGTTTTCGGATCGTAAAGCTCTGTTGTTGGTGAAGAAGGATAGAGGTAGTAACTGGCCTTTATTTGACGGTAATCAACCAGAAAGTCACGGCTAACTACGT
102	0	0	0	0	0	0	37	0	0	0.84	Root;Bacteria;Bacteroidetes;Flavobacteria;Flavobacteriales;Flavobacteriaceae;Flavobacterium	TGAGGAATATTGGTCAATGGGCGCAAGCCTGAACCAGCCATGCCGCGTGCAGGATGACGGTCCTATGGATTGTAAAACTGCTTTTGTACGGGAAGAAACCCTCCTACGTGTAGGAGCTTGACGGTACCGTAAGAATAAGGATCGGCTAACTCCGT
103	0	0	0	0	0	22	0	0	0	0.84	Root;Bacteria;Bacteroidetes;Bacteroidetes;Bacteroidales	TGAGGAATATTGGTCAATGGGCGGAAGCCTGAACCAGCCAAGTAGCGTGCGGGACGAAGGCCCTACGGGTTGTAAACCGCTTTAGTCGGGGAATAAAGTCTCCCACGCGTTGGGAGTTTGCAGGTACCCGAAGAATAAGGACCGGCTAATTCCGT
104	0	0	0	0	0	1	0	0	0	1	Root;Bacteria	TGGGGAATATTGCACAATGGGCGAAAGCCTGATGCAGCAACGCCGCGTGAGCGATGAAGGCCTTCGGGTCGTAAACTGCTTTTATAAGGGAATAAAGTGGGAGTCGTGACTCTTTTGCATGTACCTTATGAATAAGGACCGGCTAATTCCGT
105	0	0	0	0	15	0	0	0	0	1	Root;Bacteria	TCGAGAATTTTGGGCAATGGGGGCAACCCTGACCCAGCAATGCCGCGTGCGGGATGAAGGTCTTCGGATTGTAAACCGCTGTCAAGAGGGACGAATACAATTGACGGTACCTCTGGAGGAAGTCACGGCTAACTACGT
106	0	0	0	0	0	1	0	0	0	0.99	Root;Bacteria;Bacteroidetes;Bacteroidetes;Bacteroidales;Prevotellaceae	TGAGGAATATTGGTCAATGGGCGAGAGCCTGAACCAGCCAAGTAGCGTGCAGGATGACGGCCCTATGGGTTGTAAACTGCTTTTATATGGGGATAAAGTGAGCCACGTGTGGCTTATTGCAGGTATCATATGAATAAGGACCGGCTAATCCGT
107	0	0	0	0	1	0	0	0	0	0.81	Root;Bacteria;Firmicutes;"Clostridia";Clostridiales	TGGGGAATATTGCGCAATGGGGGCAACCCTGACGCAGCAACGCCGCGTGAAGGAAGAAGGTCTTCGGATTGTAAACTTCTGTCTTTAGGGAAGAAGAAAGTGACGGTACCTAAGGAGGAAGCCACGGCTAACTACGT
108	0	0	0	0	0	0	0	3	0	0.97	Root;Bacteria;Firmicutes;"Erysipelotrichi";"Erysipelotrichales";Erysipelotrichaceae;Erysipelotrichaceae Incertae Sedis	TAGGGAATTTTCGGCAATGGGGGAAACCCTGACCGAGCAACGCCGCGTGAAGGAAGAAGGTTTTCGGATTGTAAACTTCTGTTATAAAGGAAGAACGGCGGCTACAGGAAATGGTAGCCGAGTGACGGTACTTTATTAGAAAGCCACGGCTAACTACGT
109	0	0	0	0	0	0	0	0	1	1	Root;Bacteria	TCGAGAATCTTCCGCAATGGGCGAAAGCCTGACGGAGCGATGCCGCGTGAGGGACGAAGGCCTTCGGGTCGTAAACCTCTGTCACCCGGGACGAAGCAAATGACGGTACCGGGAGAGGAAGCCACGGCTAACTACGT
110	0	0	0	0	0	0	0	0	4	0.9	Root;Bacteria;Firmicutes;"Clostridia";Clostridiales;"Lachnospiraceae"	TGGGGAATATTGCACAATGGGGGAAACCCTGATGCAGCAACGCCGCGTGAGTGAAGAAGTCATTCGTGATGTAAAGCTCTATCAGCAGGGAAGAAAATGACGGTACCTGAGTAAGAAGCCCCGGCTAACTACGT
111	0	0	26	3	0	0	0	0	0	0.84	Root;Bacteria;Firmicutes;"Bacilli";Bacillales;Bacillaceae	TAGGGAATCTTCCGCAATGGACGAAAGTCTGACGGAGCGACGCCGCGTGAGTGATGAAGGTCTTCGGATCGTAAAACTCTGTTGTTAGGGAAGAATAAGTATCGACCTAACAAGTCGGTACCTTGACGGTACCTAACCAGAAAGCCCCGGCTAACTACGT
112	0	0	0	0	0	1	0	0	0	1	Root;Bacteria	TGAGGAATATTGGTCAATGGACGAGAGTCTGAACCAGCCAAGTAGCGTGAAGGATGACTGCCCTATGGGTTGTAAAGCACTTTCGGAGGGGAGGAATGAAATGACGTTACCCTCAGAAGAAGCACCGGCTAACTCCGT
113	0	0	0	0	0	0	0	0	3	0.92	Root;Bacteria;Verrucomicrobia;Verrucomicrobiae;Verrucomicrobiales	TTTCGAATCATTCACAATGGGGGCAACCCTGATGGTGCGACGTCGCGTGGAGGATGACTGTCTTCGGATTGTAAACTCCTGTCAAAAGGGACTAATGATATGGTTTGTAGCCATATTTGAATTAACCTTTAGAGGAAGCAGTGGCTAACTCTGT
114	0	0	0	0	0	0	0	0	1	0.87	Root;Bacteria;Proteobacteria;Deltaproteobacteria;Desulfovibrionales	TGGGGAATATTGCGCAATGGGCGAAAGCCTGACGCAGCGACGCCGCGTGAGGGATGAAGGTTTTCGGATCGTAAACCTCTGTCAGAAGGGAAGAAGTTGCATGGGGCCAATCACCTGTGCATTGACGGTACCTTCAAAGGAAGCACCGGCTAACTCCGT
115	0	0	0	0	1	0	0	0	0	1	Root;Bacteria	TGGGGCATATCGGGCAATGGAGGAAACTCTGACTCAGCAACGCCGCGTGGAGGAAGAAGGTTTTCGGATCGTAAACTCCTGTCCTTGGAGACGAGTAGAAGACGGTATCCAAGGAGGAAGCCCCGGCTAACTACGT
116	0	0	0	0	0	0	2	0	0	0.8	Root;Bacteria;Proteobacteria;Gammaproteobacteria;Legionellales;Legionellaceae	TGGGGAATTTTGGACAATGGGCGAAAGCCTGATCCAGCAATGCCGCGTGTGTGAAGAAGGCCTTCGGGTTGTAAAGCACTTTCAGTGGGGAGGAGGCTTGTTAGGTTAAGAGCTAGATAAGTGGACGTTACCCACAGAAGAAGCACCGGCTAACTCCGT
117	0	4	11	10	1	16	1623	0	2	1	Root;Bacteria;Proteobacteria;Gammaproteobacteria;Enterobacteriales;Enterobacteriaceae	TGGGGAATATTGCACAATGGGCGCAAGCCTGATGCAGCCATGCCGCGTGTATGAAGAAGGCCTTCGGGTTGTAAAGTACTTTCAGCGGGGAGGAAGGGAGTAAAGTTAATACCTTTGCTCATTGACGTTACCCGCAGAAGAAGCACCGGCTAACTCCGT
118	0	0	0	0	0	1	0	0	0	0.88	Root;Bacteria;Bacteroidetes	TGAGGAATATTGGTCAATGGACGGAAGTCTGAACCAGCCAAGTAGCGTGCAGGATGACGGCCCTATGGGTTGTAAACTGCTTTTATATGGGAATAAAGTGAGCGACTTTAGTAGGAAATGGCTAGAGTGTGACGGTACCTTGTGAGAAAGCCACGGCTAACTACGT
119	0	0	0	0	0	0	1	0	0	0.96	Root;Bacteria;Fusobacteria;Fusobacteria;Fusobacteriales;Fusobacteriaceae;Sneathia	TGGGGAATATTGGACAATGGAGGGAACTCTGATCCAGCAATTCTGTGTGTGTGAAGAAGGTTTTAGGACTGTAAAACACTTTTAGTAGGGAAGAAAAATGACGGTACCTACAGAAGAAGCAACGGCTAAATACGT
120	0	0	0	0	0	0	1	0	0	0.91	Root;Bacteria;Proteobacteria	TGGGGAATATTGGACAATGGGCGGAAGCCTGACGCAGCGACGTCGCGTGAGTGATGAAGGCCTTCGGGTTGTAAAGCTCTGTGGGGCGAGACGAATAAGTTCCGGCTAATACCCGGAGCGATGACGGTATCGCCTTAGCAAGCACCGGCTAACTCTGT
121	0	0	0	0	0	0	0	1	0	0.99	Root;Bacteria	TGGGGAATCTTCCGCAATGGGCGAAAGCCTGACGGGGCAATGCCGCGTGAGTGATGAAGGAATTCGTTCCGTAAAGCTCTTTTGTTTATGACGAATGTGCAGATTGTGAATAATAATCTGCAATGACGGTAGTAAACGAATAAGCCACGGCTAACTACGT
122	0	0	0	0	0	0	1	0	0	0.97	Root;Bacteria;Proteobacteria;Gammaproteobacteria	TGGGGAATTTTGGACAATGGGGGCAACCCTGATCCAGCCATGCCGCGTGTGTGAAGAAGGCTTTCGGGTTGTAAAGCACTTTCAGCGAGGAGGAAAGGGTATTGCTTAATAGGTAATATCTGTGACGTTACTCGCAGAAGAAGCACCGGCTAACTCCGT
123	0	2	0	0	0	0	0	6	0	0.96	Root;Bacteria;Proteobacteria;Betaproteobacteria;Burkholderiales;Alcaligenaceae;Achromobacter	TGGGGAATTTTGGACAATGGGGGAAACCCTGATCCAGCCATCCCGCGTGTGCGATGAAGGCCTTCGGGTTGTAAAGCACTTTTGGCAGGAAAGAAACGTCATGGGCTAATACCCCGTGAAACTGACGGTACCTGCAGAATAAGCACCGGCTAACTACGT
124	0	0	1	0	0	0	0	0	0	1	Root;Bacteria;Firmicutes;"Bacilli";Bacillales;Planococcaceae;Pasteuriaceae Incertae Sedis	TAGGGAATCTTCCACAATGGGCGAAAGCCTGATGGAGCAACGCCGCGTGAGTGAAGAAGGTTTTCGGATCGTAAAACTCTGTTGTAAGGGGAAGAACAAGTACAGTAGTAACTGGCTGTACCTTGACGGTACCTTATTAGAAAGCCACGGCTAACTACGT
125	0	0	1	0	0	0	55	0	0	0.82	Root;Bacteria;Proteobacteria;Betaproteobacteria;Burkholderiales;Burkholderiaceae	TGGGGAATTTTGGACAATGGGCGAAAGCCTGATCCAGCAATGCCGCGTGTGTGAAGAAGGCCTTCGGGTTGTAAAGCACTTTTGTTCGGGGAAGAAAGCTTCGTCGCTAATACCGATGGAGGATGACGGTACCGGAAGAATAAGCACCGGCTAACTACGT
126	0	0	0	0	0	0	0	1	0	0.92	Root;Bacteria;Proteobacteria;Alphaproteobacteria;Rhizobiales	TGGGGAATATTGGACAATGGGCGCAAGCCTGATCCAGCCATGCCGCGTGTGTGATGAAGGCCTTAGGGTTGTAAAGCACTTTCGTCCGGGACGATAATGACGGTACCGGAAGAAGAAGCCCCGGCTAACTTCGT
127	0	0	0	0	1	1	0	0	0	0.96	Root;Bacteria;Firmicutes;"Bacilli";Bacillales;Bacillaceae	TAGGGAATCTTCCGCAATGGACGAAGGTCTGACGGAGCAACGCCGCGTGAGTGATGAAGGTTTTCGGATCGTAAAACTCTGTTGTTAGGGGAAGAACAAGTACCGTTCGAATAGGACGGTGCCATGACGGTACCTAACCAGAAAGCCCCGGCTAACTACGT
128	0	0	0	0	0	1	0	0	0	0.92	Root;Bacteria;Firmicutes	TGGGGAATATTGCACAATGGGGGAAACCCTGATGCAGCGACGCCGCGTGAAGGAAGAAGTATCTCGGTATGTAAAGCTCTGTTGCGAGGGAAGAACGGCCCGCCCAGGAAATGGGGCGGGTTTGACGGTACCTCGCCAGAAAGTGACGGCTAACTACGT
129	0	0	0	0	3	41	0	18	1	1	Root;Bacteria	TCGGGAATATTGCGCAATGGAGGAAACTCTGACGCAGTGACGCCGCGTGCAGGAAGAAGGTTTTCGGATTGTAAACTGCTTTAGACAGGGAAGAATAAAGACAGTACCTGTAGAATAAGCTCCGGCTAACTACGT
130	0	0	0	0	0	0	1	0	0	1	Root;Bacteria	TGGGGAATATTGGACAATGGGCGAAAGCCTGATCCAGCCATGCCGCGTGGAGGATGAAGGCCCTCTGGGTTGTAAACTTCTTTTCTTTGGGACGAAACCCCTGTTTCTACGGGGACTGACGGTACCAGAGGAATAAGCACCGGCTAACTCCGT
131	0	0	0	0	0	0	0	0	1	1	Root;Bacteria	TGGGCAATATCGCACAATGGGCGAAAGCCTGATACATCAACGCCGCGAGAACAATGAAAGCCTTCGGGTCCTAAAGCTCTGTCCTCAAGGAAGATAATGACAGTACTTGAGGAGGAAACCACGGCTAACTACCT
132	0	5	0	0	0	0	0	0	0	0.81	Root;Bacteria	TGCGCGTCACGAGGTCTGGGGGCAGCCCAGCAAGCGCGACAGCGAGAAGCGAGGCGATGAAGGCGAGGAGAGAGCACGGCGAGAAAAGCGCGGGCAGCAGGAGCCAGCAGCGCGTGAGAGTCAGCGGGGGCCAAGCCAGCGCCTGCACCACACCGGAGATTCCACAGCGATTACGCACCGATTATAGCCGATTACGGAGCGGTAGGGACCCCAGCAGTGA
133	0	0	0	0	0	0	6	0	0	0.81	Root;Bacteria;Chlamydiae;Chlamydiae;Chlamydiales	TCGAGAATTTTTCGCAATGGGCGCAAGCCTGACGAAGCGACGCCGTGTGAGTGAAGAAGGCCTTCGGGTTGTAAAGCTCTTTCGCTAGGGAACAAGAGATTCTGGATAATACCCAGGAGATTTGATGGTACTTGGTAAAGAAGCACCGGCTAACTCCGT
134	0	0	0	0	1	0	0	0	3	0.93	Root;Bacteria;Bacteroidetes	TGAGGAATATTGGTCAATGGGCGGAAGCCTGAACCAGCCAAGTAGCGTGCAGGAAGACGGCCCTCCGGGTTGTAAACTGCTTTTAGTTGGGAATAAAACGGGGCTCGTGAGCCCCCTCGCATGTACCATCAGAAAAAGGACCGGCTAATTCCGT
135	0	0	0	0	2	1	0	0	0	1	Root;Bacteria;Firmicutes;"Clostridia";Clostridiales;"Lachnospiraceae"	TGGGGATATTGCACAATGGAGGAAACTCTGATGCAGCGACGCCGCGTGAGTGAAGAAGTATTTCGGTATGTAAAGCTCTATCAGCAGGGAAGAAAATGACGGTACCTGACTAAGAAGCCCCGGATAACTACGT
136	0	0	0	0	78	69	0	0	15	0.92	Root;Bacteria;Bacteroidetes;Bacteroidetes;Bacteroidales;Prevotellaceae;Prevotella	TGAGGAATATTGGTCAATGGGCGAGAGCCTGAACCAGCCAAGTAGCGTGCAGGATGACGGCCCTATGGGTTGTAAACTGCTTTTATAGGGGAATAAAGTGAGAGTCGTGACTCTTTTTGCATGTACCCTATGAATAAGGACCGGCTAATTCCGT
137	0	3	0	0	0	0	106	0	0	0.89	Root;Bacteria;Proteobacteria;Betaproteobacteria;Burkholderiales;Comamonadaceae;Variovorax	TGGGGAATTTTGGACAATGGGCGCAAGCCTGATCCAGCCATGCCGCGTGCAGGATGAAGGCCTTCGGGTTGTAAACTGCTTTTGTACGGAACGAAACGGCCTTTTCTAATAAAGAGGGCTAATGACGGTACCGTAAGAATAAGCACCGGCTAACTACGT
138	0	0	0	0	0	0	7	0	0	1	Root	GCGCGCAAATTACCCACTCCCGACCCGGGGAGGTAGTGACGAAAATAACAATACAGGACTCTTTCGAGGCCCTGTAATTGGAATGAGTCCACTTTAAATCCTTTAACGAGGATCCATTGGAGGGCAAGTCTGGT
139	0	0	0	0	0	0	4	0	0	0.98	Root;Bacteria;Cyanobacteria;Cyanobacteria;Chloroplast;Streptophyta	TGGGGAATTTTCCGCAATGGGCGAAAGCCTGACGGAGCAATGCCGCATGGAGGTAGAAGGCCTACGGGTCGTGAACTTCTTTTCCCGGAGAAGAAACAATGACGATATCTGGGGAATAAGCATCGGCTAACTCTGT
140	0	0	0	0	0	0	5	0	0	0.8	Root;Bacteria;Proteobacteria;Alphaproteobacteria;Rhodospirillales;Acetobacteraceae	TGGGGAATATTGGACAATGGGGGAAACCCTGATCCAGCAATGCCGCGTGGGTGATGAAGGCCTTCGGGTTGTAAAGCCCTTTCGGCGGGGACGATGATGACGGTACCCGCAGAAGAAGCCCCGGCTAACTTCGT
141	0	0	0	0	1	0	0	0	0	0.96	Root;Bacteria;Acidobacteria;Acidobacteria;Acidobacteriales;Acidobacteriaceae;Gp3	TGGGGAATCTTGCACAATGGGGGAAACCCTGATGCAGCGACGCCGCGTGAGCGATGAAGCCCTTCGGGGTGTAAAGCTCTTTCGGCAGGGAAGAAAAATGACGGTACCTGCAGAAGCAGCTGCGGCTAACTACGT
142	0	0	0	0	1	0	0	0	0	1	Root;Bacteria	TGGGGAATCTTGCGCAATGGGCGAAAGCCTGACGCAGCAACGCCGCGTGAGGGAGGACGGCCTTCGGGTTGTAAACCTCTTTCGACATCGACGAAGGCCCTCACGTGTGGGGATGGACGGTAGGTGTCAAAGAAGCACCGGCTAACTACGT
143	0	0	0	0	2	0	0	0	0	1	Root;Bacteria;Firmicutes;"Clostridia";Clostridiales;"Lachnospiraceae"	TGGGGAATATTGCACAATAGGGGAAACCCTGATGCAGCGACGCCGCGTGAGTGAAGAAGTAATTCGTTATGTAAAGCTCTATCAGAGGGAAGAAAATGACGGTACCTGACTAAGAAGCTCCGGCTAACTACGT
144	0	0	0	0	0	0	1	0	0	0.93	Root;Bacteria;Proteobacteria;Betaproteobacteria;Burkholderiales;Comamonadaceae	TGGGGAATTTTGGTACAATGGGCGAAAGCCTGATCCAGCAATGCCGCGTGCAGGATGAAGGTCTTCGGGTTGTAAACTGCTTTTGTACGGAACGAAAAAGCTTCTCCTAATAACTCGGAGGGATGACGGTACCTGAAGAATAAGCACCGGCTAACTACGT
145	0	0	0	0	4	0	0	0	0	0.99	Root;Bacteria	TTTCGAATCATTCACAATGGGGGAAACCCTGATGGTGCAACGCCGCGTGAGGGATGACGGCCTTCGGGTTGTAAACCTCTGTCACACAGGACTAACCGTAAGGTTCATAGCCTTACCTGAATTAACTGTGAGAGGAAGTAGTGGCTAACTCCGT
146	0	0	0	0	0	0	55	0	0	1	Root;Bacteria;Proteobacteria;Gammaproteobacteria;Legionellales;Legionellaceae;Legionella	TGGGGAATATTGGACAATGGGGGCAACCCTGATCCAGCAATGCCGCGTGTGTGAAGAAGGCCTGAGGGTTGTAAAGCACTTTCAGTGGGGAGGAGGCTTGTTAGGTTAAGAGCTAGATAAGTGGACGTTACCCACAGAAGAAGCACCGGCTAACTCCGT
147	0	0	0	0	1	0	0	0	0	0.92	Root;Bacteria;Firmicutes;"Clostridia";Clostridiales;"Lachnospiraceae"	TAGGGAATATTGCACAATGGAGGAAACTCTGATGCAGCCATGCCGCGTGTGTGAAGAAGTATTTCGGTATGTAAAGCTCTATCAGCAGGGAAGAAGATGACGGTACCTGACTAAGAAGCACCGGCTAAATACGT
148	0	0	0	0	0	0	11	0	0	1	Root	TCACTGGGGGACTTCAATAACGAGTCGATCAAGGTGACCTACCTCTCAAGCGCCTTGATGAGTGTGGTGGAGTCCGGCTCAACCGGTTGCGGCGGCGCGCACCCCAACAATCATTACGACCCCTTTGTGCTGGATTTGCTGCGGGCGGTTATATGGACTTCACCCGCCTGCTCAAGGACGTGAAATATGGCGAGTACAAGCTGGAGTATGGTGATCGGCTGTCGCGTTTTCTGAGCAAGGCCGTGAACCGGCATTCCGAGGATGACAAGGAGTGCACCGAG
149	0	0	0	0	0	0	1	0	0	0.98	Root;Bacteria;Bacteroidetes;Bacteroidetes;Bacteroidales	TGAGGAATATTGGTCAATGGACGAGAGTCTGAACCAGCCAAATAGCGTGAAGGATGACTGCCCTATGGGTTGTAAACTTCTTTTATAAGGGATAAAGTGAGGGACGTGTCCCTTTTGTATGTACCTTATGAATAAGGATCGGCTAACTCCGT
150	0	0	0	0	0	0	0	0	1	0.99	Root;Bacteria	TACGGAATTTTCCGCGATGGGGGAAACCCTGACACGACGCAACGACCGCGTGAGCGAACAACGCCTATCGGGTCATAAAGCTCTGTTGTATACAGCGAAGAACGTCAACATGCACCGAAATGGTCGTGCGAGTGACGGTACTTTACCACAAAGCCACGAGCTAACGTACGCTA
151	0	0	0	0	0	1	0	0	0	0.85	Root;Bacteria;Actinobacteria;Actinobacteria;Actinobacteridae;Actinomycetales;Micrococcineae	TGGGGAATCTTGCACAATGGGCGAAAGCCTGATGCAGCGACGCCGCGTGAGGGGATGACGGCCTTCGGGTTGTAAACCTCTTTCAGTAGGGAAGAAGCCGCTTGCGGTGACGGTACCTGCAGAAGAAGCGCCGGCTAACTACGT
152	0	0	0	0	0	1	0	0	0	0.85	Root;Bacteria;Bacteroidetes;Bacteroidetes;Bacteroidales;Prevotellaceae	TAGGGAATATTGCACAATGGAGGAAACTCTGATGCAGCCAAGTAGCGTGCAGGATGACGGCCCTATGGGTTGTAAACTGCTTTTATATGGGGATAAAGTGAGCCACGTGTGGCTTATTGCAGGTACCATATGAATAAGGACCGGCTAATTCCCGT
153	0	0	0	0	2	0	0	0	0	1	Root;Bacteria	TGAGGAATCTTGCGCAATGGGGGCAACCCTGACGCAGCCACGCCGCGTGCCGGAAGACGGCCCTATGGGTTGTAAACGGCTTTTATAAGGGAAGAACCCGTCCCGTTCGCGGGACGCTGACGGTACCTTACGAATCAGCACCGGCTAACTCCGT
154	0	0	0	0	2	0	0	0	0	1	Root;Bacteria	TCGGGAATATTGCACAATGGAGGAAACTCTGATGCAGTGACGCCGCGTATAGGAAGAAGGTTTTCGGATTGTAAACTATCGTCGTTAGGGGAAGAAAAAAGACAGTACCTAAGGAGGAAGCTCCGGCTAACTACGT
155	0	0	0	0	1	0	0	0	0	0.93	Root;Bacteria;Bacteroidetes;Bacteroidetes;Bacteroidales	TGAGGAATATTGGTCAATGGACGAGAGTCTGAACCAGCCAAGTAGCGTGCAGGATGACGGCCCTATGGGTTGTAAACTGCTTTTATAAGGGAATAAAGTGAGTCTCGTGAGACTTTTTGCATGTACCAAATGAATAAGCCCCGGCTAACTACGT
156	0	0	0	0	0	0	1	0	0	0.88	Root;Bacteria;Bacteroidetes;Sphingobacteria;Sphingobacteriales;Flexibacteraceae	ACGGAGTTAGCCGGTGCTTACTCATACAGTACCGTCAATGCCTCTCGCAAGAGTCGTTTCTTCCTGTATAAAAGCAGTTTACAACGCATAACGCCTTCATCCTGCACGCGGCATGGCTGGGTCAGACTTGCGTCCATTGCCCAATATTACCTA
157	0	0	0	0	0	0	0	0	1	0.95	Root;Bacteria	CTAAGAATCTTCCACAATGGACGAAAGTCTGATGGAGCGACGCCGCGTGAACGATGAAGGCCGTGAGGTTGTAAAGTTCTTTTCTGGAGGGGGAATAAGGATGGCAGGGAATGGCCGTCCGATGACGTGAATCCAGGAATAAGCCCCGGCTAACTACGT
158	0	0	0	0	0	2	0	0	0	1	Root;Bacteria	TGGGGGATATTGCACAATGGAGGAAACTCTGATGCAGCAACGCCGCGTGAGGGAAGAAGGATTTCGGTTTGTAAACCTCTGTCATTGGTGACGATAATGACGGTAGCCGATGAGGAAGCTCCGGCTAATACGT
159	0	0	0	0	0	1	0	0	0	0.83	Root;Bacteria;Proteobacteria;Gammaproteobacteria;Enterobacteriales;Enterobacteriaceae;Shigella	TGGGGAATATTGCACAATGGGCGCAAGCCTGATGCAGCCATGCCGCGTGTATGAAGAAGGCCTTCGGGTTGTAAAGTACTTTCAGCGGGGAGGAAGGGAGTAAAGTTAATACCTTTGCATGTACCTTATGAATAAGGACCGGCTAATTCCGT
160	0	0	0	0	0	0	1	0	0	0.96	Root;Bacteria;Bacteroidetes;Sphingobacteria;Sphingobacteriales;Crenotrichaceae	ACGGAGTTAGCCGGTGCTTATTCCTCTGGTACCGTCAGTCCCCGTAGAAACGGGGGTTTCGTCCCAAAGAAAAGAAGTTTACAACCCAGAGGGCCTTCATCCTCCACGCGGCATGGCTGGTTCAGACTTGCGTCCATTGACCAATATTCCTTA
161	0	0	0	0	0	92	0	0	0	1	Root;Bacteria;Actinobacteria;Actinobacteria;Actinobacteridae;Bifidobacteriales;Bifidobacteriaceae;Bifidobacterium	TGGGGAATATTGCACAATGGGCGCAAGCCTGATGCAGCGACGCCGCGTGCGGGATGGAGGCCTTCGGGTTGTAAACCGCTTTTGTTCAAGGGCAAGGCACGGGGTTTCCCGTGTTGAGTGGATTGTTCGAATAAGCACCGGCTAACTACGT
162	0	0	0	0	20	0	0	0	0	1	Root;Bacteria	TAGGGAATTTTGCGCAATGGGCGAAAGCCTGACGCAGCAACGCCGCGTGAACGAGACGCCCTTCGGGGTGTAAAGTTTTGTCAGTAGGGACGAAAGATGACGGTACCTACAGAGGAAGCACCGGCTAACTCCGT
163	0	0	0	0	1	0	0	0	0	0.94	Root;Bacteria;Firmicutes;"Clostridia";Clostridiales;"Ruminococcaceae";Faecalibacterium	TGGGGAATATTGGGCAATGGGGGAAACCCTGACCCAGCAACGCCGCGTGGAGGAAGAAGGTCTTCGGATTGTAAAACTCCTGTTGTTGAGGAAGATAATGACGGTACTCAACAAGGAAGTGACGGCTAACTACGT
164	0	0	0	0	2	0	16	2	0	1	Root;Bacteria;Firmicutes;"Bacilli";"Lactobacillales";Streptococcaceae;Streptococcus	TAGGGAATCTTCGGCAATGGACGGAAGTCTGACCGAGCAACGCCGCGTGAGTGAAGAAGGTTTTCGGATCGTAAAGCTCTGTTGTAAGAGAAGAACGAGTGTGAGAGTGGAAAGTTCACACTGTGACGGTATCTTACCAGAAAGGGACGGCTAACTACGT
165	0	0	0	0	448	25	0	76	18	0.99	Root;Bacteria;Firmicutes;"Clostridia";Clostridiales;"Ruminococcaceae";Faecalibacterium	TGGGGAATATTGCACAATGGGGGAAACCCTGATGCAGCGACGCCGCGTGGAGGAAGAAGGTCTTCGGATTGTAAACTCCTGTTGTTGAGGAAGATAATGACGGTACTCAACAAGGAAGTGACGGCTAACTACGT
166	0	0	0	0	0	0	1	0	0	0.84	Root;Bacteria;Actinobacteria;Actinobacteria;Actinobacteridae;Actinomycetales	TGGGGAATATTGCACAATGGGCGCAAGCCTGATGCAGCGACGCCGCGTGAGGGATGACGGCCTTCGGGTTGTAAACCTCTTTCAATAGGGACGAAGCGCAAGTGACGGTACCGCCTTAGCAAGCACCGGCTAACTCTGT
167	0	0	0	0	0	0	0	1	0	1	Root;Bacteria	TGGGGAATCTTGCACAATGGGCGAAAGCCTGATGCAGCAACGCCGCGTGAGCGAAGAAGGCCTTTGGGTCGTAAAGCTCTGTCGGTAGGGAAGAAGGAAGTGACGGTACCTACCGAGGAAGCCCCGGCTAACTACGT
168	0	0	0	0	0	0	1	0	0	0.8	Root;Bacteria;Proteobacteria;Alphaproteobacteria;Sphingomonadales;Sphingomonadaceae	TGGGGAATATTGGACAATGGGCGAAAGCCTGATCCAGCAATGCCGCGTGAGTGATGAAGGCCTTAGGGTTGTAAAGCTCTTTTACCCGGGATGATAATGACGTTACCGCAGAAGAAGCACCGGCTAACTCCGT
169	0	0	0	0	0	0	0	0	2	0.99	Root;Bacteria	TGGGGGATATTGCACAATGGGCGAAAGCCTGATGCAGCAACGCCGCGTGAGGGAAGAAGGTCTTCGGATTGTAAACCTTTGTCCTTGCCGACGAAGAAAGTGACGGTAGGCAAGGAGGAAGTCACGGCTAACTACGT
170	0	0	0	0	0	2	0	27	6	0.82	Root;Bacteria;Firmicutes;"Clostridia";Clostridiales	TAGGGAATCTTGCACAATGGGCGAAAGCCTGATGCAGCAACGCCGCGTGAAGGATGAAGGCCTTCGGGTTGTAAACTTCTGTTCTTAGGGAAGAAGAAAGTGACGGTACCTAAGGAGAAAGCCCCGGCTAACTACGT
171	0	0	0	0	0	0	0	0	1	1	Root;Bacteria	TGGGGAATATTGCACAATGGGCGCAAGCCTGATGCAGCAACGCCGCGTGCGGGACGACGGCCTTCGGGTTGTAAACCGCTGTCCTTGGTGAAGAAACAAATGACGGTAACCATGGAGGAAGCCACGGCTAACTACGT
172	0	0	0	0	6	0	0	0	1	1	Root;Bacteria	TGGGGAATATTGGGCAATGGGGGAAACCCTGACCCAGCAACGCCGCGTGAAGGAAGAAGGTCTTCGGATCGTAAACTTCTATCCTTGGTGAAGAGGAGAAGACGGTAGCCAAGAAGGAAGCCCCGGCTAACTACGT
173	0	0	0	0	1	0	5	0	0	0.97	Root;Bacteria;Proteobacteria;Alphaproteobacteria;Rhizobiales;Phyllobacteriaceae;Mesorhizobium	TGGGGAATATTGGACAATGGGCGAAAGCCTGATCCAGCCATGCCGCGTGAGTGATGAAGGCCCTAGGGTTGTAAAGCTCTTTCAACGGTGAAGATAATGACGGTAACCGTAGAAGAAGCCCCGGCTAACTTCGT
174	0	0	0	0	0	1	0	0	0	0.96	Root;Bacteria;Firmicutes;"Bacilli";Bacillales;"Paenibacillaceae";"Paenibacillaceae 1";Paenibacillus	TAGGGAATCTTCCGCAATGGGCGAAAGCCTGACGGAGCAATGCCGCGTGAGTGATGAAGGTTTTCGGATCGTAAAGCTCTGTTGCCAGGGAAGAACGTCCTTGAGAGTAACTGCTCAAGGAGTGACGGTACCTGAGAAGAAAGCCCCCGGCTAACTACGT
175	0	0	0	0	0	0	1	0	0	0.99	Root;Bacteria	TGGGGAATTTTCCGCAATGGGCGAAAGCCTGACGGAGCAATGCCGCGTGGAGGTAGAAGGCCCACGGGTCGTGAACTTCTTTTCCCGGGATGATAATGACAGTACCGGGAGAATAAGCTCCGGCTAACTCCGT
176	0	0	0	0	0	3	0	0	2	0.98	Root;Bacteria;Firmicutes;"Clostridia";Clostridiales;"Lachnospiraceae"	TGGGGAATATTGCACAATGGGGGAAACCCTGATGCAGCGACGCCGCGTGAGTGAAGAAGTTATTCGTAACGTAAAGCTCTATCAGCAGGGAAGAAAATGACGGTACCTGACTAAGAAGCCCCGGCTAACTACGT
177	0	0	0	0	0	1	0	0	0	0.89	Root;Bacteria;Firmicutes;"Bacilli"	TGGGGAATATTGCACAATGGGCGAAAGTCTGATGGAGCAACGCCGCGTGAATGAAGAAGGCCTTCGGGTCGTAAAATTCTGTTGTCAGAGAAGAACGTGCGTGAGAGTAACTGTTCATGTATTGACGGTATCTGACCAGAAAGCCACGGCTAACTACGT
178	0	0	0	0	0	7	0	0	0	0.89	Root;Bacteria;Firmicutes;"Clostridia";Clostridiales;"Peptostreptococcaceae";"Peptostreptococcaceae Incertae Sedis"	TAGGGAATCTTCGGCAATGGGCGAAAGCCTGATGCAGCAACGCCGCGTGAGCGATGAAGGCCTTCGGGTCGTAAAGCTCTGTCCTCAAGGAAGATAATGACGGTACTTGAGGAGGAAGCCCCGGCTAACTACGT
179	0	0	0	0	1	0	0	0	0	0.83	Root;Bacteria;Firmicutes;"Clostridia";Clostridiales;"Ruminococcaceae"	TGGGGAATATTGCACAATGGGGGAAACCCTGATGCAGCAACGCCGCGTGAAGGAAGACGGTTTTCGGATTGTAAACTTCTGTTCTTAGTGAAGAATAATGACGGTACTCAACAAGGAAGTGACGGCTAACTACGT
180	0	0	0	0	0	1	0	0	0	1	Root;Bacteria	TGGGGAATATTGCACAATGGGCGAAAGCCTGACGCAGTGACGCCGCGTGCAGGAAGAAGGTTTTCGGATTGTAAACTGCTTTAGACAGGGAAGAATAAAGACAGTACCTGTAGAATAAGCTCCGGCTAACTACGT
181	0	0	0	0	0	0	0	0	1	0.99	Root;Bacteria	TGGGGAATATTGCACAATGGGGGGAACCCTGATGCAGCGACGCCGCGTGAAGGAAGAAGGTATTCGTATTGTAAACTTCTGTCGCAGATGACGAAGAATGACGGTAATCTGCAAGAAAGCACCGGCTAACTACGT
182	0	0	0	0	1	0	0	2	0	1	Root;Bacteria	TGGGGAATATTGGGCAATGGACGCAAGTCTGACCCAGCAACGCCGCGTGAAGGAAGAAGGCTTTCGGGTTGTAAACTTCTTTGACAGGGGAAGAGCAGAAGACGGTACCCTGAAAACAAGCCACGGCTAACTACGT
183	0	0	0	1	0	0	0	0	0	0.84	Root;Bacteria;Proteobacteria;Alphaproteobacteria;Rhizobiales;Bradyrhizobiaceae	TGGGGAATATTGGACAATGGGCGCAAGCCTGATCCAGCCATGCCGCGTGAGTGATGAAGGCCCTAGGGTTGTAAAGCTCTTTTGTGCGGGAAGATAATGACGGTACCTAACCAGAAAGCCCCGGCTAACTACGT
184	0	0	0	0	0	0	0	8	2	1	Root;Bacteria;Firmicutes;"Clostridia";Clostridiales;Veillonellaceae;Mitsuokella	TGGGGAATCTTCCGCAATGGGCGCAAGCCTGACGGAGCAACGCCGCGTGAGTGAAGAAGGGTTTCGACTCGTAAAGCTCTGTTGTCGGGGACGAATGTGGAGATGGTGAATAACCATTTTCAATGACGGTACCTGACGAGGAAGCCACGGCTAACTACGT
185	0	0	0	0	0	13	0	0	0	0.82	Root;Bacteria;Firmicutes;"Clostridia";Clostridiales;Clostridiaceae;"Clostridiaceae 1"	TGGGGAATATTGCACAATGGGCGAAAGCCTGATGCAGCAACGCCGCGTGAGCGATGAAGGCCTTCGGGTCGTAAAGCTCTGTCTTCAGGGACGATAATGACGGTACCTGAGGAGGAAGCCACGGCTAACTACGT
186	0	0	0	0	49	5	0	18	29	1	Root;Bacteria	TGGGGAATATTGGGCAATGGGCGCAAGCCTGACCCAGCAACGCCGCGTGAAGGAAGAAGGCTTTCGGGTTGTAAACTTCTTTTGTCAGGGACGAGTAGAAGACGGTACCTGACGAATAAGCCACGGCTAACTACGT
187	0	0	0	0	1	0	0	0	0	0.85	Root;Bacteria;Firmicutes;"Clostridia";Clostridiales	TGGGGAATATTGCACAATGGGCGAAAGCCTGATGCAGCAACGCCGCGTGAAGGAAGAAGGTCTTCGGATCGTAAACTTCTGTCCTTGGGGAAGATAATGACGGTACCTTTGGAGGAAGCCCCGGCTAACTACGT
188	0	0	0	0	1	0	0	0	0	0.8	Root;Bacteria;Actinobacteria;Actinobacteria;Coriobacteridae;Coriobacteriales;Coriobacterineae;Coriobacteriaceae	TGAGGAATATTGGTCAATGGGGGCAACCCTGACGCAGCAACGCCGCGTGCGGGACGACGGCCTTCGGGTTGTAAACCGCTTTCAGCAGGGAAGAACCGAGACGGTACCTGCAGAAGAAGCCCCGGCTAACTACGT
189	0	0	0	0	0	0	0	0	1	0.99	Root;Bacteria	TGGGGAATATTGGGCAATGGGCGAAAGCCTGACCCACCGACGCCGCGTGAGGGAAGAAGGTCTTCGGATTGTAAACTTTATTTATCTGGGAAGAAGCAAGTGACGGTACCTGAAGAGAAAGCCACGGCTAACTACGT
190	0	0	0	0	0	1	0	0	0	0.98	Root;Bacteria;Actinobacteria;Actinobacteria;Actinobacteridae;Actinomycetales	TGGGGAATATTGCACAATGGGCGCAAGCCTGATGCAGCGACGCCGCGTGAGGGATGGAGGCCTTCGGGTTGTAAACCTCTTTCAGCAGGGAAGAAGCTTTCGGGTGACGGTACCTGCAGAAGAAGCGCCGGCTAACTACGT
191	0	0	0	0	0	1	0	0	0	1	Root;Bacteria	TGGGGAATATTGCACAATGGGGGAAACCCTGATGCAGCAACGCCGCGTGAGTGATGACGGCCTTCGGATTGTAAACTTCTTTTATTTAGGACGAAGGATGACGGTACTAAATGAATAAGCTCCGGCTAACTACGT
192	0	0	0	0	1	0	0	0	0	0.9	Root;Bacteria	GCACAGATGCTGATGAATGGAGAGGCAGAAGGAGTCACAAAGACTCCGGCTGATTACCAGTCGGAAGAACAGGCAAAACAGGCAAGCGAACGCACCCAAAGCAGGAAAGACCAGCCATCTTTCGCAGGTAGATCTCAAGACGATGGCGCAGTCGAATCCTTTCTACAAGGAAGCCTCGAAAATCATGCAGGGCAAACTCACAGAGACCGAT
193	0	0	0	0	0	0	0	0	1	1	Root;Bacteria;Firmicutes;"Erysipelotrichi";"Erysipelotrichales";Erysipelotrichaceae	TAGGGAATTTTCGTCAATGGGGGGAACCCTGAACGAGCAATGCCGCGTGAGTGAGGAAGGTCTTCGGATCGTAAAGCTCTGTTGTAAAGGAAGAACGTCGTACACAGGAAATGGTGTGCGAGTGACGGTACTTTACCAGAAAGCCACGGCTAACTACGT
194	0	0	0	0	0	9	0	0	0	0.95	Root;Bacteria;Bacteroidetes;Bacteroidetes;Bacteroidales;Prevotellaceae	TGAGGAATATTGGTCGATGGGCGAGAGCCTGAACCAGCCAAGTAGCGTGCAGGATGACGACCCTATGGGTTGTAAACTGCTTTTATATGGGGATAAAAGTGAGCCACGTGTGGCTCATTGCAGGTACCATATGAATAAGGACCGGCTAATTCCGT
195	0	0	0	0	5	9	0	0	2	1	Root;Bacteria	TGGGGAATTTTGCGCAATGGGGGCAACCCTGACGCAGCAACGCCGCGTGCGGGACGAAGGCGTCCGCGTCGTAAACCGCTTTCAGCGGGGAACACCTAACGAGGGTACCCGCAGAAGAAGCCCCGGCTAAATACGT
196	0	0	0	0	0	0	1	0	0	0.96	Root;Bacteria;Proteobacteria;Alphaproteobacteria;Caulobacterales;Caulobacteraceae	ACGAAGTTAGCCGGAGCTTCTTCTGCGGGTACCGTCATTATCGTCCCCGCTGAAAGAATTTTACAATCCTAAGACCTTCATCATTCACGCGGCATGGCTGCGTCAGGCTTTCGCCCATTGCGCAAGATTCCTAA
197	0	0	0	0	1	0	0	0	0	0.96	Root;Bacteria;Proteobacteria;Gammaproteobacteria;Aeromonadales;Succinivibrionaceae;Succinivibrio	ACGGAGTTAGCCGGTGCTTCTTCTGAGGGTAACGTCATTTCCTTCCTCCCCTCCGAAAGTGCTTTACAACCCGAAGGCCTTCTTCACACACGCGGCATGGCTGCATCAGAGTTTCCTCCATTGTGCAATATTCCCTA
198	5	0	0	0	0	5	0	0	0	0.82	Root;Bacteria;Firmicutes;"Bacilli";Bacillales;Bacillaceae;"Bacillaceae 1";Bacillus;Bacillus c	TAGGGAATCTTCCGCAATGGACGAAAGTCTGACGGAGCAACGCCGCGTGAACGAAGAAGGCCTTCGGGTCGTAAAGTTCTGTTGTTAGGGAAGAACAAGTACCAGAGTAACTGCTGGTACCTTGACGGTACCTAACCAGAAAGCCACGGCTAACTACGT
199	0	0	0	0	1	0	0	0	0	0.96	Root;Bacteria;Bacteroidetes;Bacteroidetes;Bacteroidales	TGGGGAATATTGCACAATGGACGAGAGTCTGAACCAGCCAAGTAGCGTGCAGGATGACGGCCCTATGGGTTGTAAACTGCTTTTATAAGGGAATAAAGTGAGTCACGTGTGACTTTTTGCATGTACCTTATGAATAAGGACCGGCTAATTCCGT
200	0	0	0	0	0	0	0	0	2	0.85	Root;Bacteria;Proteobacteria;Deltaproteobacteria	TGGGGAATATTGCGCAATGGGCGAAAGCCTGACGCAGCGACGCCGCGTGAGGGATGAAGGTCTTCGGATCGTAAACCTCTGTCAGAAGGGAAAAATGTACAGTGCCCCAATCAACACTGTATTGATGGTACCTTCAGAGGAAGCACCGGCTAACTCCGT
201	0	0	0	0	0	1	0	0	0	1	Root;Bacteria;Bacteroidetes;Sphingobacteria;Sphingobacteriales;Sphingobacteriaceae	TAAGGAATATTGGTCAATGGAGGCAACTCTGAACCAGCCATGCCGCGTGCAGGATGACTGCCCTATGGGTTGTAAACTGCTTTTGTCCAGGAATAAACCTTTCTACGTGTAGAGAGCTGAATGTACTGGAAGAATAAGGATCGGCTAACTCCGT
202	2	0	0	0	0	1	0	0	0	1	Root;Bacteria;Firmicutes;"Bacilli";Bacillales;"Staphylococcaceae";Salinicoccus	TAGGGAATCTTCCGCAATGGACGAAAGTCTGACGGAGCAACGCCGCGTGAGTGAAGAAGGGTTTCGGCTCGTAAAACTCTGTTGTCAGGGAAGAACGTCCCCGTGAGTAACTGCACGGGGAGTGACGGTACCTGACCAGAAAGCCACGGCTAACTACGT
203	0	0	0	0	0	0	3	0	0	0.87	Root;Bacteria;Firmicutes;"Erysipelotrichi";"Erysipelotrichales";Erysipelotrichaceae	TAGGGAATTTTCGGCAATGGGCGCAAGCCTGACCGAGCAACGCCGCGTGAGTGATTAAGGCCTTCGGGTTGTAAAGCTCTGTTGTAAGGGAAGAACATTCAGGATAGGAAATGATCTTGAACTGACGGTACCTTACCAGAAAGCCACGGCTAACTACGT
204	0	0	0	0	0	1	0	0	0	0.88	Root;Bacteria;Firmicutes;"Bacilli";"Lactobacillales";Streptococcaceae;Streptococcus	TGGGGAATATTGCACAATGGGCGAAAGCCTGACCGAGCAACGCCGCGTGAGTGAAGAAGGTTTTCGGATCGTAAAGCTCTGTTGTAAGAGAAGAACGTGTGTGAGAGTGGAAAGTTCACACAGTGACGGTAACTTACCAGAAAGGGACGGCTAACTACGT
205	0	0	0	0	0	1	0	0	0	0.9	Root;Bacteria;Firmicutes	TGGGGAATATTGCACAATGGGCGAAACCCTGACCGAGCAACGCCGCGTGAGTGATGAAGGTCTTCGGATTGTAAAGCTCTGTTGTAAGGGAAGAACGGCATCTAGAGAATAGGTGAGTGACGGTACCTTACCAGAAAGCTACGGCTAACTACGT
206	4	0	0	0	0	0	0	0	0	0.92	Root;Bacteria;Firmicutes	TAGGGAATCTTCCGCAATGGACGAAAGTCTGACGGAGCAACGCCGCGTGAGGGAAGAAGGCCTTCGGGTCGTAAAGCTCTGTTATTAGAGAAGAAAACTTCAGTAGTCAAATAGACTATTGAATTGACGGTATCTAAAAAGAAAGTCACGGCTAACTACGT
207	1	0	0	0	0	0	0	0	0	0.84	Root;Bacteria;Proteobacteria;Alphaproteobacteria;Rhizobiales;Hyphomicrobiaceae;Devosia	TGGGGAATATTGGACAATGGGCGAAAGCCTGATCCAGCCATGCCGCGTGAGTGATGAAGGCCTTAGGGTTGTAAAGCTCTTTCAGTGGGGAAGATAATGACGGTACCCACAGAAGAAGCCCCCGGCTAACTTCGT
208	0	7	9	4	1	0	825	0	0	0.83	Root;Bacteria;Proteobacteria;Betaproteobacteria;Burkholderiales;Incertae sedis 5	TGGGGAATTTTGGACAATGGGGGCAACCCTGATCCAGCCATGCCGCGTGCGGGAAGAAGGCCTTCGGGTTGTAAACCGCTTTTGTCAGGGAAGAAATCCTTTGGGCTAATAACTCGGAGGGATGACGGTACCTGAAGAATAAGCACCGGCTAACTACGT
209	0	0	0	0	0	0	1	0	0	1	Root;Bacteria;Proteobacteria;Gammaproteobacteria	TGGGGAATATTGGACAATGGGGGGAACCCTGATCCAGCCATGCCGCGTGTGTGAAGAAGGCCTTATGGTTGTAAAGCACTTTAAGCGAGGAGGAGGGAGTAAAGTTAATACCTTTGCTCATTGACGTTACCCGCAGAAGAAGCACCGGCTAACTCCGT
210	1	0	0	0	0	0	0	0	0	0.92	Root;Bacteria;Proteobacteria;Alphaproteobacteria;Rhizobiales	TGGGGAATATTGGACAATGGGGGCAACCCTGATCCAGCCATGCCGCGTGAGTGATGAAGGCCCTAGGGTTGTAAAGCTCTTTTAACGGGGGAAGATAATGACGGTACCCGTAGAATAAGCCCCGGCTAACTTCGT
211	0	4	0	0	0	0	2	0	0	0.99	Root;Bacteria;Actinobacteria;Actinobacteria;Actinobacteridae	TGGGGAATATTGCACAATGGGCGCAAGCCTGATGCAGCGACGCCGCGTGGGGGATGACGGCCTTCGGGTTGTAAACTCCTTTCAGCCATGACGAAGCCTCTTTTGGGGTGACGGTAGTGGTAGAAGAAGCACCGGCTAACTACGT
212	0	4	0	0	0	0	0	0	0	1	Root;Bacteria;Bacteroidetes;Flavobacteria;Flavobacteriales;Flavobacteriaceae;Elizabethkingia	TGAGGAATATTGGACAATGGGTGGAAGCCTGATCCAGCCATCCCGCGTGCAGGAAGACGGCCCTATGGGTTGTAAACTGCTTTTATCTGGGGATAAACCTACTTACGTGTAAGTAGCTGAAGGTACCAGAAGAATAAGCACCGGCTAACTCCGT
213	0	0	0	0	1	0	0	0	0	0.86	Root;Bacteria;Firmicutes;"Clostridia";Clostridiales;"Ruminococcaceae";Faecalibacterium	TGAGGAATATTGGTCAATGGACGAGAGTCTGAACCAGCCAAGTAGCGTGGAGGAAGAAGGTCTTCGGATTGTAAACTCCTGTTGTTGAGGAAGATAATGACGGTACTCAACAAGGAAGTGACGGCTAACTACGT
214	0	0	0	0	0	0	0	3	0	0.95	Root;Bacteria;Firmicutes;"Bacilli";"Lactobacillales";Lactobacillaceae;Lactobacillus	TAGGGAATCTTCCACAATGGACGCAAGTCTGATGGAGCAACGCCGCGTGAGTGAAGAAGGCTTTCGGGTCGTAAAACTCTGTTGTTGGAGAAGAATGGTCGGCAGAGTAACTGTTGTCGGCGTGACGGTATCCAACCAGAAAGCCACGGCTAACTACGT
215	0	0	0	0	0	0	0	2	0	0.92	Root;Bacteria;Firmicutes;"Bacilli";"Lactobacillales";Lactobacillaceae;Lactobacillus	TAGGGAATCTTCCACAATGGACGAAAGTCTGATGGAGCAACGCCGCGTGAGTGAAGAAGGGTTTCGGCTCGTAAAACTCTGTTGTTAAAGAAGAACATATCTGAGAGTAACTGTTCAGGTATTGACGGTATTTAACCAGAAAGCCACGGCTAACTACGT
216	0	0	0	0	0	0	0	0	1	1	Root;Bacteria	TGGGGAATATTGGGCAATGGGCGAAAGCCTGACCCAGCGACGCCGCGTGAAGGAAGAAGGCCTTCGGGTTGTAAACTTTAGTAAGCAGGGAAGAAGAAAGTGACGGTACCTGCAGAGTAAGCCACGGCTAACTACGT
217	0	0	0	0	5	62	9	1	6	1	Root;Bacteria;Firmicutes;"Bacilli";"Lactobacillales";Streptococcaceae;Streptococcus	TAGGGAATCTTCGGCAATGGGGGCAACCCTGACCGAGCAACGCCGCGTGAGTGAAGAAGGTTTTCGGATCGTAAAGCTCTGTTGTAAGAGAAGAACGTGTGTGAGAGTGGAAAGTTCACACAGTGACGGTAACTTACCAGAAAGGGACGGCTAACTACGT
218	0	0	0	0	0	0	0	0	1	0.96	Root;Bacteria;Firmicutes;"Clostridia";Clostridiales;"Lachnospiraceae"	TGGGGAATATTGCACAATGGAGGGAACTCTGATGCAGCGACGCCGCGTGAGTGAAGAAGTATCTCGGTATGTAAAACTCTATCAGCAGGGAAGATAATGACGGTACCTGACTAAGAAGCACCGGCTAAATACGT
219	0	0	0	0	1	0	0	0	0	1	Root;Bacteria	TGGGGAATATTGGGCAATGGGCGAAAGCCTGACCCAGCGACGCCGCGTGAAGGAAGAAGGCCCTCGGGTTGTAAACTTCAGTCAACAGGGAAGAAACAAATGACGGTACCTGTGGAGGAAGCCACGGCTAACTACGT
220	0	0	0	0	0	2	0	0	0	0.92	Root;Bacteria;Firmicutes;"Bacilli";Bacillales;Bacillaceae;"Bacillaceae 1";Bacillus	TAGGGAATCTTCCGCAATGGACGAAAGTCTGACGGAGCAACGCCGCGTGAGTGATGAAGGCCTTCGGGTCGTAAAACTCTGTTGTTAGGGAAGAACAAGTACCGTTCGAATAGGGCGGTACCGTGACGGTACCTAACCAGAAAGCCACGGCTAACTACGT
221	0	0	0	0	3	0	0	0	0	0.87	Root;Bacteria;Tenericutes;Mollicutes	TAGGGAATTTTCGGCAATGGACGGAAGTCTGACCGAGCAACGCCGCGTGAATGATGAAGTATTTCGGTATGTAAAGTTCTTTTATTTGGGAAGAAAAAACAAATTGACGGTACCAAATGAATAAGCCCCGGCTAACTACGT
222	0	0	0	0	0	0	0	1	0	0.85	Root;Bacteria;Firmicutes;"Clostridia";Clostridiales	TGGGGGATATTGCACAATGGAGGGAACTCTGATGCAGCAACGCCGCGTGAGGGAAGAAGGTCTTCGGATTGTAAACCTTTGTCCTCAGGGAAGATAATGACGGTACCTGAGGAGGAAGCTCCGGCTAACTACGT
223	0	0	0	0	1	0	0	0	0	0.88	Root;Bacteria	CCATGAGGTTGTGACCAGGGATAGCAGTGCTCTTGCCGTTGCGATACTTGCCCAAACGAGGACCCAGGCAGATAGCACCTACCAATGCCAATACACCACCTACACTGTGAACAATGGCAGAACCTGCGAAGTCGTGGAAGGCAGCACCAAAGGTGTCCATCATGAATGAGCCTGCGTCAGCGTTGCAAA
224	0	0	0	0	0	0	0	1	0	0.98	Root;Bacteria;Firmicutes;"Clostridia";Clostridiales	TGGGGGATATTGCACAATGGGGGGAACCCTGATGCAGCGACGCCGCGTGAGGGAAGAAGGTTTTCGGATTGTAAACCTCTGTCTTTAGTGACGATAATGACGGTAGCTAAAGAGGAAGCCACGGCTAACTACGT
225	0	0	0	0	1	0	0	2	0	1	Root;Bacteria	TGGGGAATATTGGGCAATGGGGGAAACCCTGACCCAGCAACGCCGCGTGGAGGAAGAAGGTCTTCGGATTGTAAACTCCTGTCCTTAGGGAAGAAACAAATGACGGTACCTGAGGAGGAAGCTCCGGCTAACTACGT
226	0	0	0	0	0	0	0	1	0	0.92	Root;Bacteria;Firmicutes;"Clostridia";Clostridiales;"Ruminococcaceae"	TGGGGGATATTGCACAATGGAGGAAACTCTGATGCAGCGACGCCGCGTGAGGGAAGACGGTCTTCGGATTGTAAACCTCTGTCTTAGGGGAAGAAAATGACGGTACCCTAAGAGGAAGCTCCGGCTAACTACGT
227	0	0	0	0	0	0	6	0	0	0.99	Root;Bacteria;Proteobacteria;Betaproteobacteria;Burkholderiales;Comamonadaceae	TGGGGAATTTTGGACAATGGGCGCAAGCCTGATCCAGCCATGCCGCGTGCAGGATGAAGGCCTTCGGGTTGTAAACTGCTTTTGTACGGAACGAAAGGTTCTGCCCTAATACGGTGGGAATATGACGGTACCGTAAGAATAAGCACCGGCTAACTACGT
228	0	0	0	0	0	0	0	28	4	0.86	Root;Bacteria;Firmicutes;"Clostridia";Clostridiales;"Ruminococcaceae";Ruminococcus	TGGGGGATATTGCGCAATGGGGGCAACCCTGACGCAGCAACGCCGCGTGAAGGATGAAGGTTTTCGGATTGTAAACTTCTTTTATTAAGGACGAAACTTGACGGTACTTAATGAATAAGCTCCGGCTAACTACGT
229	0	0	0	0	0	0	1	0	0	0.99	Root;Bacteria;Actinobacteria;Actinobacteria;Actinobacteridae;Actinomycetales;Actinomycineae;Actinomycetaceae;Varibaculum	TGGGTGATATTGCACAATGGGCGCAAGCCTGATGCAGCGACGCCGCGTGGGGGATGAAGGCCTTCGGGTTGTAAACTTCTTTTGCTCTGAACAAGGCGCACTTTGGGGTGTGTTGAGTGTAGGGGTTGATTAGCGCCGGCTAACTACGT
230	0	0	0	0	0	1	0	0	0	0.94	Root;Bacteria;Firmicutes;"Clostridia";Clostridiales	TGGGGAATATTGCACAATGGGCGAAAGCCTGATGCAGCAACGCCGCGTGAGCGATGAAGGCCTTCGGATTGTAAACTCCTGTCGTTAGGGACGATAATGACGGTACCTAACAAGAAAGCACCGGCTAACTACGT
231	0	0	0	0	0	0	0	1	0	0.97	Root;Bacteria;Bacteroidetes;Sphingobacteria;Sphingobacteriales	TAAGGAATATTGGTCAATGGACGCAAGTCTGAACCAGCCATGCCGCGTGAAGGATGAAGGTCCTCTGGATTGTAAACTTCTTTTATAGGGGGCGAAAAAAGGGAATTCTTTCTCACTTGACAGTACCCTATGAATAAGCACCGGCTAACTCCGT
232	0	0	0	0	1	0	0	0	0	0.99	Root;Bacteria;Bacteroidetes;Bacteroidetes;Bacteroidales	TGAGGAATATTGGTCAATGGGCGCGAGCCTGAACCAGCCAAGTAGCGTGAAGGATGACTGCCCTATGGGTTGTAAACTTCTTTATGCGGGAATAAAGTGAGTCTCGTGAGGCTTTTTGCATGTACCTTATGAATAAGGACCGGCTAATTCCGT
233	0	2	0	0	0	0	0	0	0	0.86	Root;Bacteria	CGACATCGGACTGCTTGACGGCTAACGCTCGGCACTGTCTTCCCGCAGTGTTCCATGGAGGGACCACGCTCACCTTGGAGTCGGGTTTTGTTGCCCGATACTGGTTATCGTTGCTTGCGGTGGAGAGAGATGCCGAGGACGGGGGAGTGGTACCGCCACTGCGGTGAGATACGATGGATAGCTCCGGACTAACG
234	0	0	0	0	0	0	0	0	4	0.89	Root;Bacteria;Firmicutes;"Clostridia";Clostridiales	TGGGGAATATTGCACAATGGAGGGAACTCTGATGCAGCGATGCCGCGTGAGGGAAGAAGGTTTTAGGATTGTAAACCTCTGTTGACAGGGACGATAATGACGGTACCTGTTGAGGAAGCTCCGGCTAACTACGT
235	0	0	0	0	9	2	0	0	0	0.88	Root;Bacteria;Bacteroidetes;Bacteroidetes;Bacteroidales;Prevotellaceae;Prevotella	TGAGGAATATTGGTCAATGGGCGAGAGCCTGAACCAGCCAAGTAGCGTGCAGGAAGACGGCCCTATGGGTTGTAAACTGCTTTTATATGGGGATAAAGTGAGTCACGTGTGACTTATTGCAGGTACCATATGAATAAGGACCGGCTAATTCCGT
236	0	0	0	0	0	0	0	0	2	0.97	Root;Bacteria;Firmicutes;"Clostridia";Clostridiales	TGGGGAATATTGCACAATGGGCGCAAGCCTGATGCAGCAACGCCGCGTGAGGGAAGACGGTCTTCGGATTGTAAACCTCTGTCCTTGGTGACGAAACAAATGACGGTAGCCGAGGAGGAAGCCACGGCTAACTACGT
237	0	0	3	0	0	0	0	0	0	0.85	Root;Bacteria;Firmicutes;"Bacilli";Bacillales;"Paenibacillaceae";"Paenibacillaceae 1"	TAGGGAATCTTCCGCAATGGACGCAAGTCTGACGGAGCAACGCCGCGTGAGTGAGGAAGGCCTTCGGGTCGTAAAGCTCTGTTGCCAGGGAAGAACAAGCACTTGAGTAACTGCAAGAGCTTTGACGGTACCTGAGAAGAAAGCCCCGGCTAACTACGT
238	0	0	0	0	0	0	0	0	1	1	Root;Bacteria	TGAGGGATATTGCACAATGGGCGCAAGCCTGATGCAGCAACGCCGCGTGAAGGATGACGGTTTTCGGATTGTAAACTTCTGTTCTTAGTGATGATAATGACATTAGCTAAGGAGAAAGCCACGGCTAACTACGT
239	0	0	0	0	0	0	0	0	23	0.87	Root;Bacteria;Firmicutes;"Clostridia";Clostridiales;"Ruminococcaceae";Ruminococcus	TGGGGAATATTGCACAATGGGGGAAACCCTGATGCAGCGATGCCGCGTGGAGGAAGAAGGTTTTCGGATTGTAAACTCCTGTCTTAAGGGACGATAATGACGGTACCTTAGGAGGAAGCTCCGGCTAACTACGT
240	0	0	0	0	0	0	0	0	1	1	Root;Bacteria	TGGGGAATATTGCGCAATGGAGGCAACTCTGACGCAGCAATGCCGCGTGAGTGAAGAAGGAATTCGTTCCGTAAAGCTCTGCCGTTAGGGAAGAGAGCAGACGGTACCTAACAAGCAAGCCCCGGCTAACTACGT
241	0	0	0	0	2	0	0	0	2	1	Root;Bacteria	TGGGGAATATTGGGCAATGGGCGAAAGCCTGACCCAGCGACGCCGCGTGAGGGAAGAAGGTCTTCGGATTGTAAACCTTAGTCAACAGGGAAGAAGAAAGTGACGGTACCTGTGGAGGAAGCCACGGCTAACTACGT
242	0	0	0	0	0	0	0	0	1	1	Root;Bacteria	TGGGGAATATTGCGCAATGGGGGGAACCCTGACGCAGCAACGCCGCGTGCAGGAAGAAGGTCTTCGGATTGTAAACTGTTGTCGCAGGGGAAGAAGGAAGTGACGGTACCCTGTGAGAAAGCCACGGCTAACTACGT
243	0	0	0	0	1	0	0	0	0	0.88	Root;Bacteria;Bacteroidetes;Bacteroidetes;Bacteroidales;Prevotellaceae	TGAGGAATATTGGTCAATGGGCGAGAGCCTGAACCAGCCAAGTAGCGTGCGGGATGACTGCCCTATGGGTTGTAAACCGCTTTTGATTGGGAATAAAGTGAGTCTCGTGAGACTTTTTGCATGTACCTTATGAATAAGGACCGGCTAATTCCGT
244	0	0	0	0	0	2	0	2	0	0.86	Root;Bacteria;Actinobacteria;Actinobacteria;Actinobacteridae;Bifidobacteriales;Bifidobacteriaceae;Bifidobacterium	TGGGGAATATTGCACAATGGGCGCAAGCCTGATGCAGCGACGCCGCGTGCAGGATGACGGCCTTCGGGTTGTAAACCGCTTTTGATTGGGAGCAAGCCTTCGGGTGAGTGTACCTTTCGAATAAGCACCGGCTAACTACGT
245	0	0	0	0	0	1	0	0	0	0.98	Root;Bacteria;Firmicutes;"Bacilli";"Lactobacillales";Streptococcaceae;Lactococcus	TAGGGAATCTTCGGCAATGGGGGCAACCCTGACCGAGCAACGCCGCGTGAGTGAAGAAGGTTTTCGGATCGTAAAACTCTGTTGTTAGAGAAGAACGTTAAGTAGAGTGGAAAATTACTTAAGTGACGGCATCTAACCAGAAAGGGACGGCTAACTACGT
246	0	0	0	0	0	0	0	0	1	0.96	Root;Bacteria;Bacteroidetes;Bacteroidetes;Bacteroidales;Prevotellaceae	TGAGGAATATTGGTCAATGGTCGAGAGACTGAACCAGCCAAGTAGCGTGCAGGACGACGGCCCTATGGGTTGTAAACTGCTTTTATATGGGGATAAAGTGCGGCACGTGTGCCGTTTTGTAGGTACCATATGAATAAGGACCGGCTAATTCCGT
247	0	0	0	0	1	1	0	0	0	1	Root;Bacteria	TGAGGAATCTTGCGCAATGGGGGCAACCCTGACGCAGCCACGCCGCGTGCCGGAAGACGGCCCTATGGGTTGTAAACGGCTTTTACCAGGGGAAGAAAGTGCACCTTTCGAGGAGCATTGACGGTACCTGGAGAATCAGCACCGGCTAACTCCGT
248	0	0	0	0	0	0	14	0	0	1	Root	GCGCGCAAATTACCCAATCCTGACATGGGGAGGTAGTGACAATAAATAACAATACTGGGCTCATCGAGTCTGGTAATTGGAATGAGTACAATCTAAATCCCTTAACGAGGATCCATTGGAGGGCAAGTCTGGT
249	0	0	0	0	0	0	9	0	0	0.99	Root;Bacteria;Bacteroidetes;Flavobacteria;Flavobacteriales;Flavobacteriaceae;Epilithonimonas	TGAGGAATATTGGACAATGGGTGAGAGCCTGATCCAGCCATCCCGCGTGAAGGACTAAGGCCCTATGGGTTGTAAACTTCTTTTATACTGGGATAAACCTACTTACGTGTAAGTAGCTGAAGGTACAGTATGAATAAGCACCGGCTAACTCCGT
250	0	0	0	0	0	1	0	0	0	1	Root;Bacteria;Firmicutes	TAGGGAATCTTCCACAATGGGCGAAAGCCTGATGGAGCAACGCCGCGTGGGTGAAGAAGGTCTTCGGATCGTAAAACCCTGTTGTTAGAGAAGAACGACTTTAGTAGGAAATGGCTAGAGTGTGACGGTACCTTATGAGAAAGCCACGGCTAACTACGT
251	0	0	0	0	0	0	3	0	0	0.96	Root;Bacteria;Verrucomicrobia;Verrucomicrobiae;Verrucomicrobiales;Verrucomicrobiaceae;Verrucomicrobiaceae_genera_incertae_sedis	TCGAGAATAATTCACAATGGGGGCAACCCTGATGGTGCAACGCCGCGTGGAGGATGACGGTCTTCGGATTGTAAACTCCTGTCATCTGGGAGTAAGACCTGGCGATGAATAGTCGACAGGGTTGATAGTACCAGAAGAGGAAGGGACGGCTAACTTCGT
252	0	0	0	0	0	0	2	0	0	1	Root;Bacteria	TTAGGAATTTTCCGCAATGGGCGAAAGCCTGACGGAGCAACGCCGCGTGAGTGGTGAAGACCCTTGGGTTGTAAAGCTCTGTCGGAGGGGAAGAAATAATGACGGTACCCTCCAAGAAAGCCCCGGCTAACTACGT
253	0	0	0	0	2	0	0	0	0	1	Root;Bacteria	TGGGGAATATTGCGCAATGGGGGGAACCCTGACGCAGCAACGCCGCGTGAAGGAAGAAGGCCTTCGGGTTGTAAACTTTTGTCTTTAGTGAAAAGGAAGGATGGTAGCTAAGGAGGAAGCCACGGCTAACTACGT
254	0	0	0	0	1	0	0	0	0	0.99	Root;Bacteria;Firmicutes;"Clostridia";Clostridiales;"Lachnospiraceae"	TGGGGAATATTGCACAATAGGGGAAACCCTGATGCAGCGACGCCGCGTGAAGGAAGAAGTATTTCGGTATGTAAACTTCTATCAGCAGGGAAGAAGATGACGGTACCTGACTAAGAAGCACCGGCTAAATACGT
255	0	0	0	0	2	0	59	0	0	0.84	Root;Bacteria;Proteobacteria;Alphaproteobacteria;Sphingomonadales;Sphingomonadaceae	TGGGGAATATTGGACAATGGGCGAAAGCCTGATCCAGCAATGCCGCGTGAGTGATGAAGGCCTTAGGGTTGTAAAGCTCTTTTACTGGGGATGATAATGACAGTACCCAGAGAATAAGCCCCGGCTAACTCCGT
256	0	0	0	0	0	1	0	0	0	0.87	Root;Bacteria;Firmicutes	ACGTAGTTAGCCGTAGCTTTCTGGTAAGGTACCGTCACTCACCTATTTTCTAGATGCCGTTCTTCCCTTACAGCAGAGCTTTACAATCCGAAGACCTTCATCACTCACGCGGCGTTGCTCGGTCAGGGTTTCCCCCATTGCCGAAAATTCCCTA
257	0	0	0	0	201	62	0	485	64	1	Root;Bacteria;Firmicutes;"Clostridia";Clostridiales;"Lachnospiraceae"	TGGGGAATATTGCACAATGGGGGAAACCCTGATGCAGCGACGCCGCGTGAAGGAAGAAGTATCTCGGTATGTAAACTTCTATCAGCAGGGAAGAAAATGACGGTACCTGACTAAGAAGCCCCGGCTAACTACGT
258	0	0	0	0	0	1	0	0	0	0.85	Root;Bacteria;Proteobacteria;Gammaproteobacteria;Enterobacteriales;Enterobacteriaceae	TTAGGAATATTCGTCAATGGAGGAAACTCTGAACGAGCAATGCCGCGTGAGTGATGAAGGTCTTATAGATTGTAAAGTACTTTCAGCGGGGAGGAAGGGAGTAAAGTTAATACCTTTGCTCATTGACGTTACCCGCAGAAGAAGCACCGGCTAACTCCGT
259	0	0	0	0	0	0	0	0	2	1	Root;Bacteria	TGGGGAATATTGGGCAATGGGCGAAAGCCTGACCCAGCAACGCCGCGTGAAGGAAGAAGGTCTTCGGATTGTAAACTTCTTTTATCAGGGACGAAGGAAGTGACTGTACCTGATGAATAAGCCACGGCTGACTACGT
260	0	0	0	0	0	0	0	1	0	0.87	Root;Bacteria;Firmicutes;"Erysipelotrichi";"Erysipelotrichales";Erysipelotrichaceae;Erysipelothrix	TAGGGAATTTTCGGCAATGGGGGAAACCCTGACCGAGCAACGCCGCGTGAGTGATGACGGCCTTCGGGTTGTAAAGCTCTGTTGTAAGGGAAGAACGGTAGATAGAGAATATCTAAATGACGGTACCTTACCAGAAAGCCACGGCTAACTACGT
261	0	0	0	0	0	16	0	0	0	0.96	Root;Bacteria;Actinobacteria;Actinobacteria;Actinobacteridae;Bifidobacteriales;Bifidobacteriaceae;Bifidobacterium	TGGGGAATATTGCACAATGGGCGCAAGCCTGATGCAGCGACGCCGCGTGAGGGATGGAGGCCTTCGGGTTGTAAACCTCTTTTGTTAGGGAGCAAGGCATTTTGTGTTGAGTGTACCTTTCGAATAAGCACCGGCTAACTACGT
262	0	0	0	0	0	6	0	0	0	0.96	Root;Bacteria;Proteobacteria;Gammaproteobacteria;Pseudomonadales;Moraxellaceae	TGGGGAATATTGGACAATGGGCGAAAGCCTGATCCAGCCATGCCGCGTGTGTGAAGAAGGCCTTTTGGTTGTAAAGCACTTTAAGTGGGGGAGGAGGCTACCAAGATTAATACCCTTGGATAGTGGACGTTACCCACAGAATAAGCACCGGCTAACTCTGT
263	0	0	0	0	0	0	0	1	0	1	Root;Bacteria;Firmicutes;"Clostridia";Clostridiales;Incertae Sedis XIII;Mogibacterium	TAGGGAATCTTGCACAATGGGCGAAAGCCTGATGCAGCAACGCCGCGTGAAGGATGAAGGCCTTCGGGTTGTAAACTTCTGTTCTAAGGGAAGAAACAAATGACGGTACCTTAGGAGCAAGCCCCGGCTAACTACGT
264	0	0	0	0	0	0	0	0	1	0.82	Root;Bacteria	TGGGGAATATTGCGCAATGGAGGAAACTCTGACGCAGCGATGCCGCGTGGGCGAAGAAGGGCTCCGGCCCGTAAAGCCCTGCCGCCGGGGAAGAGTAAAGACGGTACCCGGCAAGCAAGCCCCGGCCAATCACGT
265	0	0	0	0	0	0	1	0	0	0.97	Root;Bacteria;Proteobacteria;Alphaproteobacteria;Rhizobiales;Bradyrhizobiaceae	TGGGGAAGTATTGGACAATGGGGGCGAACCCTGATCCAGCCATGCCGCGTGAGTGATGAAGGCCCTAGGGTTGTAAAGCTCTTTTGTGCGGGAAGATAATGACGGTACCGCAAGAATAAGCCCCGGCTAACTTCGT
266	0	0	0	0	0	0	1	0	0	0.99	Root;Bacteria;Proteobacteria;Gammaproteobacteria;Pseudomonadales;Moraxellaceae;Acinetobacter	TGGGGAAGTATTGGACAATGGGGGAACCCGTGATCCAGCCATGCCGCGTGTGTGAAGAAGGCCTTATGGTTGTAAAGCACTTTAAGCGAGGAGGAGGCTACTGAGACTAATACTCTTGGATAGTGGACGTTACTCGCAGAATAAGCACCGGCTAACTCTGT
267	0	0	0	0	2	0	0	0	0	1	Root;Bacteria	TGGGGAATATTGCACAATGGGCGAAAGCCTGATGCAGCAACGCCGTGTGAGCGATGAAGGCCTTCGGGTCGTAAAGCTCTATCAGCAGGGAAGAAGATGGCGGTACCTGACTAAGAAGCACCGGCTAAATACGT
268	0	0	0	0	0	0	1	0	0	0.96	Root;Bacteria;Proteobacteria;Gammaproteobacteria	TGGGGAATATTGCACAATGGGCGCAAGCCTGATGCAGCCATGCCGCGTGTGTGAAGAAGGCTTTCGGGTTGTAAAGCACTTTCAGCGAGGAGGAGGCTCTTCTAGTTAATACCTAGGATGAGTGGACGTTACTCGCAGAATAAGCACCGGCTAACTCTGT
269	0	0	0	0	0	0	0	0	1	1	Root;Bacteria	TGGGGAATATTGGGCAATGGAGGAAACTCTGACCCAGCAATGCCGCGTGAATGAAGAAGGTCTTCGGATTGTAAAGTTCTTTAGTCAGGGAAGAAGTCAATGACGGTACCTGAAGAATAAGCTCCGGCTAACTACGT
270	0	0	0	0	0	0	0	0	2	0.92	Root;Bacteria;Bacteroidetes	TGAGGAATATTGGTCAATGGGCGGAAGCCTGAACCAGCCAAGTCGCGTGAGGGAAGACGGTCCTATGGATTGTAACCCTCTTTTGCCGGGGAGCAATGCCACCTTTGCGAAGGTGGAGGGAGAGTACCCGGAGAAAAAGCATCGGCTAACTCCGT
271	0	0	0	0	1	0	0	0	0	0.91	Root;Bacteria	CACCAGGAACTTATGCCGCAGGGCAAAGCCCACCACCCGGCCATAGCCGTTCAGGAGCTTCCCATTGGTCTTTCTCTCTTTCTTCTGTTTCTTCATCATGCCGGAGGCCATGGCGGGAACCAGGGTCAAGGACACAAATCAGGGAG
272	0	0	0	0	0	0	0	0	2	0.99	Root;Bacteria	TTAGGAATATTCGGCAATGGGCGAAAGCCTGACCGAGCAATGCCGCGTGTGAGATGAAGGTCCTCTGGATTGTAAATCACTTTTATTAGGGAAGAACGGTAAGTATAGGAAATGCTACTTACGTGACGGTACCTTTTGAATAAGCCCCGGCTAACTACGT
273	0	0	0	8	0	0	0	0	0	0.8	Root;Bacteria;Actinobacteria;Actinobacteria;Actinobacteridae;Actinomycetales;Pseudonocardineae;Pseudonocardiaceae;Amycolatopsis	TGGGGAATATTGCACAATGGGCGCAAGCCTGATGCAGCGACGCCGCGTGAGGGATGACGGCCTTCGGGTTGTAAACCTCTTTCGCCAGGGACGAAGCCTTCGGGTGACGGTACCTGGATAAGAAGCACCGGCTAACTACGT
274	0	0	0	0	0	0	0	0	1	0.92	Root;Bacteria;Bacteroidetes;Bacteroidetes;Bacteroidales	TGAGGAATATTGGTCAATGGGCGGAAGCCTGAACCAGCCAAGTAGCGTGCAGGAAGACGGCCCTATGGGTTGTAAACTGCTTTTGTGCGGGGGTAAAGTCACTCACGAGTTGGGTGTTTGCAAGTACCGCATGAATAAGGATCGGCTAATTCCGT
275	0	0	0	0	1	0	0	0	0	1	Root;Bacteria	TGGGGGATATTGGACAATGGGGGAAACCCTGATCCAGCGATGCCGCGTGAGGGAAGAAGGTTTTCGGATTGTAAACCTCTGTGGACAGTGACGATAATGACGGTAGCTGTTTAGAAAGCCACGGCTAACTACGT
276	0	0	0	0	0	2	0	0	0	0.99	Root;Bacteria;Tenericutes;Mollicutes;Mycoplasmatales;Mycoplasmataceae;Mycoplasma	TAGGGAATTTTCCGCAATGAGCGAAAGCTTGACGGAGCGACACAGCGTGCAGGATGAAGGTTTTCGGATTGTAAACTGCTGTTGTAAGGGAAGAAAAAATTTGATAGGAAATGATTAAATCTTGACGGTACCTTATTAGAAAGTGACGACTAACTATGT
277	0	0	0	0	0	0	0	0	1	0.97	Root;Bacteria	TGAGGAATATTGGTCAATGGCCGAGAGGCTGAACCAGCCAAGCCGCGTGAGGGAAGAAGGCCCTACGGGTCGTAAACCTCTTTTGTCAGGGAACAAAAACCGGTACGTGTACCGGGTTGAGTGTACCTGAAGAAAAAGCATCGGCTAACTCCGT
278	1	0	16	0	0	0	0	0	0	1	Root;Bacteria;Firmicutes;"Bacilli";Bacillales	TAGGGAATCTTCCGCAATGGACGAAAGTCTGACGGAGCAACGCCGCGTGAGTGATGAAGGTCTTCGGATCGTAAAACTCTGTTGTTAGGGAAGAACAAGTACGTTAGTAACTGAACGTACCTTGACGGTACCTAACCAGAAAGCCCCGGCTAACTACGT
279	0	0	0	0	1	0	0	0	0	0.97	Root;Bacteria;Bacteroidetes	TGAGGAATATTGGTCAATGGACGAGAGTCTGAACCAGCCAAGTAGCGTGCAGGATGACGGCCCTATGGGTTGTAAACTGCTTTTATAAGGGAGAGAAAAGACTGTACCTGCAGAAGAAGCCCCGGCTAACTACGT
280	0	0	3	0	0	0	0	0	0	0.83	Root;Bacteria;Actinobacteria;Actinobacteria;Actinobacteridae;Actinomycetales	TGGGGAATCTTGCGCAATGGGCGAAAGCCTGACGCAGCAACGCCGCGTGGGGGATGACGGCCTTCGGGTTGTAAACCTCTTTCGACGCTGAGGAAGCCTGCCTTGTTGAGTGGGTGACGGTAGGTGTAGAAGAAGCACCGGCTAACTACGT
281	0	0	0	1	0	0	0	0	0	0.9	Root;Bacteria;Firmicutes;"Bacilli";Bacillales	TAGGGAATCATCCGCAATGGGCGAAAGCCTGACGGTGCAACGCCGCGTGAGTGAAGAAGGTTTTCGGATCGTAAAGCTCTGTTATCTGGGAAGAACAAGTACTAGTCAAATAGGCTGGTACCTTGACGGTACCCGATCAGAAAGCCCCGGCTAACTACGT
282	0	0	0	0	2	1	0	0	0	0.99	Root;Bacteria;Proteobacteria;Betaproteobacteria;Burkholderiales;Alcaligenaceae;Sutterella	TGGGGAATTTTGGACAATGGGGGCAACCCTGATCCAGCCATGCCGCGTGCAGGATGAAGGTCTTCGGATTGTAAACTGCTTTTGTCAGGGACGAAAAGGAGCGTGTTAATACCATGTTCTGCTGACGGTACCTGAAGAATAAGCACCGGCTAACTACGT
283	0	0	0	0	1	0	0	0	0	1	Root;Bacteria	TGGGGAATATTGGGCAATGGGCGCAAGCCTGACCCAGCAACGCCGCGTGAAGGATGAAGGTTTTCGGATTGTAAACTTCTGTCCTCAGGGGACGAACTAAATGACGGTACCTGAGGAGGAAGCCCCGGCTAACTACGT
284	0	0	0	0	0	1	0	0	0	1	Root;Bacteria	ACGTAGTTAGCCGGTGCTTATTCAACGGGTAAACTCACTCACGCTTGCTCCCCGATAAAAGAAGTTTACAATCCGAAAACCTTCATCCTTCACGCGGCGTTGCTGCGTCAGGGTTTCCCCCATTGCGCAATATCCCCCA
285	0	3	1	4	3	0	951	3	0	1	Root;Bacteria;Proteobacteria;Alphaproteobacteria;Sphingomonadales;Sphingomonadaceae	TGGGGAATATTGGACAATGGGCGAAAGCCTGATCCAGCAATGCCGCGTGAGTGATGAAGGCCTTAGGGTTGTAAAGCTCTTTTACCCGGGATGATAATGACAGTACCGGGAGAATAAGCTCCGGCTAACTCCGT
286	0	0	0	0	0	2	0	0	0	0.97	Root;Bacteria	TGAGGAATCTTGGGCAATGGGGGAAACCCTGACCCAGCCACGCCGCGTGGAGGAAGACACCCCTATGGGGCGTAAACTCCTTTTCTGCGGGAAGAACCCCCGGGTATGCCCGGGCTGACGGTACCGCAGGAACAAGGACCGGCTAACTCCGT
287	1	0	0	8	0	0	0	0	0	1	Root;Bacteria;Proteobacteria;Betaproteobacteria;Burkholderiales;Burkholderiaceae;Burkholderia	TGGGGAATTTTGGACAATGGGCGAAAGCCTGATCCAGCAATGCCGCGTGTGTGAAGAAGGCCTTCGGGTTGTAAAGCACTTTTGTCCGGAAAGAAATCCTTGGCTCTAATACAGTCGGGGGATGACGGTACCGGAAGAATAAGCACCGGCTAACTACGT
288	1	0	0	0	1	1	0	0	0	1	Root;Bacteria;Firmicutes;"Bacilli";Bacillales;Bacillaceae	TAGGGAATCTTCCGCAATGGACGAAAGTCTGACGGAGCAACGCCGCGTGAGCGATGAAGGTCTTCGGATCGTAAAGCTCTGTTGTTAGGGAAGAACAAGTACAAGAGTAACTGCTTGTACCTTGACGGTACCTAACCAGAAAGCCACGGCTAACTACGT
289	0	0	0	0	0	1	0	0	0	0.94	Root;Bacteria;Actinobacteria;Actinobacteria;Actinobacteridae;Actinomycetales	TGGGGAATATTGCACAATGGGGGAAACCCTGATGCAGCGACGCCGCGTGGGGGATGACGGCCTCCGGGTTGTAAACCTCTTTCAGTAGGGGAGAAGCCCTTCGGGGTGACGGTACCTGCAGAAGAAGTACCGGCTAACTACGT
290	2	0	0	0	0	0	0	0	0	1	Root;Bacteria;Actinobacteria;Actinobacteria;Actinobacteridae;Actinomycetales	TGGGGAATATTGCACAATGGGCGAAAGCCTGATGCAGCGACGCCGCGTGAGGGATGACGGCTTTCGGGTTGTAAACCTCTTTCAGCAGGGAAGAAGCGCAAGTGACGGTACCTGCAGAAGAAGTGCCGGCTAACTACGT
291	0	0	0	0	0	0	0	0	2	0.93	Root;Bacteria;Bacteroidetes	TGAGGAATATTGGTCAATGGGCGGAAGCCTGAACCAGCCATGCCGCGTGCAGGAATAAGGCCCTATGGGTCGTAAACTGCTTTTGTGCGGGAGCAATAAGGGCTACGTGTAGCCTGATGAGAGTACCGTACGAATAAGCATCGGCTAACTCCGT
292	0	0	0	0	28	2	0	0	3	0.95	Root;Bacteria;Bacteroidetes;Bacteroidetes;Bacteroidales;Prevotellaceae;Prevotella	TGAGGAATATTGGTCAATGGGCGAGAGCCTGAACCAGCCAAGTAGCGTGCAGGATGACGGCCCTATGGGTTGTAAACTGCTTTTATAGGGGAATAAAGTGAGCCACGTGTGGTTTTTTGCATGTACCCTATGAATAAGGACCGGCTAATTCCGT
293	0	0	0	0	0	0	1	0	0	0.84	Root;Bacteria;Proteobacteria;Alphaproteobacteria;Rhizobiales;Bradyrhizobiaceae	TGGGGAATATTGGACAATGGGGGGAACCCTGATCCAGCCATGCCGCGTGTGTGAAGAAGGCCTTATGGTTGTAAAGCTCTTTTGTGCGGGAAGATAATGACGGTACCGCAAGAATAAGCCCCGGCTAACTTCGT
294	0	0	0	0	0	0	4	0	0	0.98	Root;Bacteria;Proteobacteria;Betaproteobacteria;Burkholderiales;Oxalobacteraceae	TGGGGAATTTTGGACAATGGGCGAAAGCCTGATCCAGCAATGCCGCGTGAGTGAAGAAGGCCTTCGGGTTGTAAAGCTCTTTTGTCAGGGAAGAAACGGTGGGAGCTAATATCTCCTGCTAATGACGGTACCTGAAGAATAAGCACCGGCTAACTACGT
295	0	0	0	0	1	0	0	0	0	0.99	Root;Bacteria;Proteobacteria;Betaproteobacteria;Burkholderiales;Comamonadaceae;Comamonas	TGGGGAATTTTGGACAATGGGCGAAAGCCTGATCCAGCAATGCCGCGTGCAGGATGAAGGCCCTCGGGTTGTAAACTGCTTTTGTACGGAACGAAAAGCCTGGGGCTAATATCCCCGGGTCATGACGGTACCGTAAGAATAAGCACCGGCTAACTACGT
296	0	0	0	0	0	1	0	0	0	0.83	Root;Bacteria;Firmicutes;"Clostridia";Clostridiales	TGGGGAATATTGCACAATGGGCGAAAGCCTGATGCAGCAACGCCGCGTGAGCGATGAAGGCCTTCGGGTCGTAAAGCTCTGTCCTCAAGGAAGAGAGAAGACTGTACCTGCAGAAGAAGCCCCGGCTAACTACGT
297	0	0	0	0	25	0	0	59	0	0.82	Root;Bacteria;Firmicutes	TAGGGAATTTTCGGCAATGGGGGAAACCCTGACCGAGCAACGCCGCGTGAAGGAAGAAGTAATTCGTTATGTAAACTTCTGTCATAGAGGAAGAACGGTGGATATAGGGAATGATATCCAAGTGACGGTACTCTATAAGAAAGCCACGGCTAACTACGT
298	0	0	0	0	0	0	0	0	3	1	Root;Bacteria;Bacteroidetes;Bacteroidetes;Bacteroidales;Prevotellaceae	TGAGGAATATTGGTCAATGGGCGAGAGCCTGAACCAGCCAAGTAGCGTGCAGGACGACGGCCCTATGGGTTGTAAACCGCTTTTATACGGGGATAAAACGGGGGACGTGTCCCTCCTTGCAGGTACCGTATGAATAAGGACCGGCTAATTCCGT
299	0	0	0	0	2	0	0	0	0	0.95	Root;Bacteria	TGGGGAATATTGGGCAATGGAGGCAACTCTGACCCAGCAATGCCGCGTGGGCGATGAAGGTAGTTTTATTGTAAAGCTCTTTTCTCTGGAACGAACAAATGACGGTACCAGAGGAATAAGCCCCGGCTAATCCGT
300	0	0	0	0	0	0	0	0	1	0.98	Root;Bacteria	TAGGGAATCTTCGTCAATGGGCGCAAGCCTGAACGAGCGATGCCGCGTGGGTGAAGGAGCTTTTCGGAGTGTAAAGCCCTGTTGTGGATGAAAAAGGACAAGAGCAGGAAATGGCTTTAGTTTGATGGAAGTCCACGAGGAAGTCACGGCTAACTACGT
301	0	0	0	0	0	0	2	0	0	0.95	Root;Bacteria;Proteobacteria;Betaproteobacteria;Burkholderiales;Oxalobacteraceae	TGGGGAATTTTGGACAATGGGGGCAACCCTGATCCAGCAATGCCGCGTGAGTGAGGAAGGCCTTCGGGTTGTAAAGCTCTTTTGTCAGGGAAGAAACGGTGATCTCTAATATAGATTGCTAATGACGGTACCTGAAGAATAAGCACCGGCTAACTACGT
302	0	0	0	0	0	0	0	1	0	0.85	Root;Bacteria;Firmicutes;"Clostridia";Clostridiales	TGGGGAATATTGCACAATGGAGGGAACTCTGATGCATCGACGCCGCATGAGTGAATAACTATTTCGGTATGTAAAGCTCTATCACCAGGGAAGAAAATGACGGTACCTGACTAAGAAGCACCGGCTAAATACCT
303	0	0	0	0	0	0	0	0	1	1	Root;Bacteria	TGGGGAATATTGCGCAATGGAGGCAACTCTGACGCAGCGATGCCGCGTGAGTGAGGAAGGGATTCGTCCCGCAGAGCTCAGGAGTCAGCAAAGAGAGAGACGGTCGCTGACTTTAAGCCCCGGCTAACTACGT
304	0	0	0	0	0	0	1	0	0	1	Root	CTGGTGACCTCACTTTGAGTAGCAGGTCGTATTGGGCTTCGGGAGCTTCAGAGGGTCTGTGAAGTTCTGAAATCATACGCAGAAATGTGTGTACATGCATTCTTTAGGGGGTGGGCCTAATTCCCTTACATCAGTTTCTCGGGAGGT
305	0	0	0	0	1	0	0	0	0	0.81	Root;Bacteria;Firmicutes;"Clostridia";Clostridiales;"Ruminococcaceae";Faecalibacterium	TGGGGAATATTGCGCAATGGGGGAAACCCTGATGCAGCGACGCCGCGTGGAGGAAGAAGGTCTTCGGATTGTAAACTCCTGTTGTTGAGGAAGATAATGACGGTACCTGAGTAAGAAGCCCCGGCTAACTACGT
306	0	0	0	2	0	0	0	0	0	0.96	Root;Bacteria;Firmicutes;"Bacilli";Bacillales;Bacillaceae	TAGGGAATCTTCCGCAATGGACGAAAGTCTGACGGAGCAACGCCGCGTGAGTGATGAAGGTTTTCGGATCGTAAAACTCTGTTGTTAGGGAAGAACAAGTACTAAAGTAACTGTTAGTACCTTGACGGTACCTAACCAGAAAGCCCCGGCTAACTACGT
307	0	0	0	0	0	1	0	0	0	0.93	Root;Bacteria;Firmicutes;"Bacilli";"Lactobacillales"	TAGGGAATCTTCGGCAATGGACGAAAGTCTGACCGAGCAACGCCGCGTGAGTGAAGAAGGTTTTCGGATCGTAAAACTCTGTTGTTAGAGAAGAACAAGGACGTTAGTAACTGAACGTCCCCTGACGGTATCTAACCAGAAAGCCACGGCTAACTACGT
308	0	0	0	0	0	0	0	0	2	0.9	Root;Bacteria;Bacteroidetes;Bacteroidetes;Bacteroidales;Prevotellaceae	TGAGGAATATTGGTCAATGGCCGAGAGGCTGAACCAGCCAAGTAGCGTGCAGGATGACGGCCCTACGGGTTGTAAACTGCTTTTGCGGGAGGATAACCGGCGCCACGTGTGGCGCCCTGCAGGTATCCCGTGAATAAGGACCGGCTAATTCCGT
309	0	0	0	0	1	1	0	0	0	0.9	Root;Bacteria;Proteobacteria	TGGGGAATCTTGGACAATGGGCGCAAGCCTGATCCAGCGACGCCGCGTGGGTGAAGAAGGCCTTCGGGTTGTAAAGCCCTTTCGCCGGGGACGATGATGACGGTACCCGGAGAAGAAGCACCGGCTAACTCCGT
310	0	0	0	0	0	0	40	0	0	0.95	Root;Bacteria;Proteobacteria;Betaproteobacteria;Burkholderiales;Burkholderiaceae	TGGGGAATTTTGGACAATGGGGGCAACCCTGATCCAGCAATGCCGCGTGTGTGAAGAAGGCCTTCGGGTTGTAAAGCACTTTTGTCCGGAAAGAAAACGATCTGGTTAATACCTGGGTCGGATGACGGTACCGGAAGAATAAGCACCGGCTAACTACGT
311	0	0	0	0	19	0	0	0	7	0.8	Root;Bacteria;Firmicutes;"Clostridia"	TGGGGAATATTGGGCAATGGGGGAAACCCTGACCCAGCAACGCCGCGTGAAGGAAGAAGGCCTTCGGGTTGTAAACTTCTTTTACCAGGGACGAAAAAGATGACGGTACCTGGAGAAAAAGCAACGGCTAACTACGT
312	0	0	0	0	1	0	0	0	1	0.95	Root;Bacteria;Proteobacteria;Deltaproteobacteria;Desulfovibrionales;Desulfovibrionaceae;Desulfovibrio	TGGGGAATATTGCGCAATGGGCGAAAGCCTGACGCAGCGACGCCGCGTGAGGGATGAAGGTCTTCGGATCGTAAACCTCTGTCAGAAGGGAAGAAACTAGGGTGCTCTAATCATCATCCTACTGACGGTACCTTCAAAGGAAGCACCGGCTAACTCCGT
313	0	0	0	0	0	0	60	0	0	0.97	Root;Bacteria;Proteobacteria;Betaproteobacteria;Burkholderiales;Comamonadaceae	TGGGGAATTTTGGACAATGGACGCAAGTCTGATCCAGCCATTCCGCGTGCAGGACGAAGGCCTTCGGGTTGTAAACTGCTTTTGTACGGAACGAAAAGGTCTCTATTAATACTAGGGGCTCATGACGGTACCGTAAGAATAAGCACCGGCTAACTACGT
314	0	0	0	0	0	0	0	1	0	1	Root;Bacteria	TTAGGAATATTCGTCAATGGGGGAAACCCTGAACGAGCAATGCCGCGTGAGTGATGACGGTCTTATAGATTGTAAAACTCTGTTGTGAAGAAAGAAACCTTACTATAGGTAATGATAGTAAGCTGACGGTACTTCACCAGAAAGCCCCGGCTAACTACGT
315	0	0	0	0	0	0	0	1	0	1	Root;Bacteria	TTAGGAATATTCGACAATGGAGGAAACTCTGATCGAGCAATGCCGCGTGAGTGATGACGGTCCTTTGGATTGTAAAACTCTTTTATTAGGGAAGAACGACTAGTATAGGAAATGATACTAGAGTGACGGTACCTTTTGAATAAGCCCCGGCTAACTACGT
316	0	0	0	0	0	0	0	0	1	1	Root;Bacteria	TTAGGAATATTCGTCAATGGGGGAAACCCTGAACGAGCAATGCCGCGTGAGTGATGACGGTCCTCTGGATTGTAAAACTCTGTTGTTTGGAAAGAACTGTAAGAAGAGGAAATGCTTCTTACTTGACGGTACCATTCAAGAAAGCCACGGCTAACTACGT
317	0	0	0	0	0	0	0	1	2	1	Root;Bacteria	TTAGGAATATTCGTCAATGGGGGGAACCCTGAACGAGCAATGCCGCGTGAATGAAGAAGGCCCTATGGGTTGTAAAATTCTGTTGTTTGGAAAGAAATGTAAAGTTAGGAAATGAACTTTACTTGACGGTACCATTCAAGAAAGCCACGGCTAACTACGT
318	0	0	0	0	16	18	0	28	6	0.8	Root;Bacteria;Firmicutes;"Erysipelotrichi";"Erysipelotrichales";Erysipelotrichaceae	TAGGGAATTTTCGGCAATGGGGGCAACCCTGACCGAGCAACGCCGCGTGAGTGATGAAGGTCTTCGGATTGTAAAGCTCTGTTGTAAGGGAAGAACGGCATCTAGAGAATAGGTGAGTGACGGTACCTTACCAGAAAGCTACGGCTAACTACGT
319	0	0	1	0	14	134	0	9	0	1	Root;Bacteria;Firmicutes;"Erysipelotrichi";"Erysipelotrichales";Erysipelotrichaceae;Turicibacter	TAGGGAATCTTCGGCAATGGGCGAAAGCCTGACCGAGCAACGCCGCGTGAATGATGAAGGCCTTCGGGTTGTAAAATTCTGTTATAAGGGAAGAACGACTTTAGTAGGAAATGGCTAGAGTGTGACGGTACCTTATGAGAAAGCCACGGCTAACTACGT
320	0	0	0	0	0	0	1	0	0	0.95	Root;Bacteria;Proteobacteria;Betaproteobacteria;Burkholderiales;Comamonadaceae	TGGGGAATATTGGACAATGGGCGCAAGCCTGATCCAGCCATACCGCGTGGGTGAAGAAGGCCTTCGGGTTGTAAACTGCTTTTGTACGGAACGAAAAAGCTCCTTCTAATACAGGGGGCCCATGACGGTACCGTAAGAATAAGCACCGGCTAACTACGT
321	0	0	0	0	0	1	0	0	0	1	Root;Bacteria;Firmicutes;"Clostridia";Clostridiales;"Lachnospiraceae"	TGGGGAATATTGCACAATGGGGGAAACCCTGATGCAGCGACGCCGCGTGAGCGAAGAAGTATTTCGGTATGTAAAGCTCTATCAGCAGGGAAGAAAATGACGGTACCTGACTAAGAAGGACCGGCTAATTCCGT
322	0	0	0	0	1	0	0	0	0	0.89	Root;Bacteria;Bacteroidetes;Bacteroidetes;Bacteroidales;Prevotellaceae	TGAGGAATATTGGTCAATGGGCGGAAGCCTGAACCAGCCATGCCGCGTGACGGAATACGGCCCTATGGGTTGTAAACTGCTTTTAGTTGGGAATAAAGTGCACCACGTGTGGTGTTTTGTATGTACCATCAGAAAAAGGACCGGCTAATTCCGT
323	0	0	0	0	0	0	1	0	0	0.84	Root;Bacteria;Proteobacteria;Betaproteobacteria;Burkholderiales	TGGGGAATATTGCACAATGGGCGCAAGCCTGATGCAGCCATGCCGCGTGTGTGAAGAAGGCCTTCGGGTTGTAAAGCTCTTTTGTCAGGGAAGAAACACCGGCTCTAACACAGTCCGGGAATGACGGTACCTGAAGAATAAGCACCGGCTAACTACGT
324	0	0	0	0	1	0	0	0	0	0.95	Root;Bacteria	GTATGGCAGACGGACTTGGATATGGAGATAACACAAAGGCAGCGTTGATTACTCGTGGAATCAAGGAAATCAGCCGTCTGGGTGTTGCTATGAGTGCAAATACAGAGACTTTAAATGGCTTGTCAGGCATTGGAGATCTGATTATAACCTGT
325	0	0	0	0	1	0	0	0	0	0.93	Root;Bacteria	AAGGCCAGCATGAACACGTTCATCCGGAGAAACATGGTGCCGTAGCGGACCACATCCGGCTCCTGGTTAAAGATCGACACGAGACGCGAGGCAAAGAGAAAGAGAACTGCGGCACTCGCAAAGGTGATGACAAGT
326	0	0	0	0	0	4	0	0	0	0.93	Root;Bacteria;Firmicutes;"Clostridia";Clostridiales;"Lachnospiraceae"	TGGGGAATATTGCACAATGGGCGAAAGCCTGATGCAGCAACGCCGCGTGAAGGAAGAAGGTCTTCGGATTGTAAACTTCTATCAGCAGGGAAGAAGAAAATGACGGTACCTGACTAAGAAGCTCCGGCTAACTACGT
327	0	0	0	0	1	0	0	0	0	0.86	Root;Bacteria	GGTGCGCATGATGGACAGGTTCTCGCTGATGGGGTTCAGAATGCGGATGGCCTTGCGGGCTTCGTCCTCAGCGGGGATATGCAGCATATCCAGCTCGGCATTGGAGTAGAAAGCCAGCGTGGAGGCCTCGTAGAAGCCCTGTGCA
328	0	0	0	0	1	0	0	0	0	0.8	Root;Bacteria;Firmicutes;"Erysipelotrichi";"Erysipelotrichales";Erysipelotrichaceae;Erysipelotrichaceae Incertae Sedis	TAGGGAATTTTCGTCAATGGGGGGAACCCTGAACGAGCAATGCCGCGTGAGTGAGGAAGGTCTTCGGATCGTAAAGCTCTGTTGTAAGAGAAAAACGGCACTCATAGGGAATGATGAGTGAGTGACGGTACCTGACTAAGAAGCTCCGGCTAAATACGT
329	0	0	0	0	0	0	1	0	0	0.8	Root;Bacteria;Proteobacteria;Gammaproteobacteria;Pseudomonadales;Moraxellaceae;Acinetobacter	TGGGGAATATTGCACAATGGGCGCAAGCCTGATGCAGCCATGCCGCGTGTGTGAAGAAGGCCTTATGGTTGTAAAAGCACTTTTAAGCGAGGAGGAGGGTACTGGTATTAATACTACCAGCTACTGGACGTTACTCGCAGAATAAGCACCGGCTAACTCTGT
330	0	0	0	0	0	0	0	0	3	0.92	Root;Bacteria;Firmicutes;"Clostridia";Clostridiales;"Ruminococcaceae";Ruminococcus	TGGGGGATATTGCACAATGGAGGGAACTCTGATGCAGCGATGCCGCGTGGAGGAAGAAGGTTTTCGGATTGTAAACTCCTGTCTTAAAGGACGATAATGACGGTACTTTAGGAGGAAGCTCCGGCTAACTACGT
331	0	0	0	0	1	0	0	0	0	0.98	Root;Bacteria;Firmicutes;"Clostridia";Clostridiales;"Lachnospiraceae"	TGGGGAATATTGCACAATGGGGGAAACCCTGATGCAGCGACGTCGCGTGAAGGAAGAAGTATTTCGGTATGTAAACTTCTATCAGCAAGGAAGAAAATGACGATACTTGACTAAGAAGCCCCCGGCTAAAATACGT
332	0	0	0	0	0	1	0	0	0	1	Root;Bacteria;Firmicutes	TAGGGAATCTTCGGCAATGGGCGAAAGCCTGACCGAGCAACGCCGCGTGAATGATGAAGGCCTTCGGGTTGTAAAATTCTGTTGTAAGAGAAGAACGTGTGTGAGAGTGGAAAGTTCACACAGTGACGGTAACTTACCAGAAAGGGACGGCTAACTACGT
333	0	0	0	0	3	4	0	0	0	0.91	Root;Bacteria;Bacteroidetes;Bacteroidetes;Bacteroidales;Prevotellaceae;Prevotella	ACGGAATTAGCCGGTCCTTATTCATAAGGTACATGCAAAAAGCCTCACGAGACTCACTTTATTCCCTTATAAAAGCAGTTTACAACCCATAGGGCCGTCATCCTGCACGCTACTTGGCTGGTTCAGACTCTCGTCCATTGACCAATATTCCTCA
334	0	0	0	0	2	0	0	0	1	1	Root;Bacteria	TGGGGAATATTGGGCAATGGACGCAAGTCTGACCCAGCAACGCCGCGTGAAGGAAGAAGGCTTTCGGGTTGTAAACTTCTTTTAAGGGGGAAGAGCAGAAGACGGTACCCCTTGAATAAGCCACGGCTAACTACGT
335	0	0	0	0	0	3	0	0	6	0.99	Root;Bacteria;Firmicutes;"Bacilli";"Lactobacillales";Lactobacillaceae;Lactobacillus	TAGGGAATCTTCCACAATGGGCGCAAGCCTGATGGAGCAACACCGCGTGAGTGAAGAAGGGTTTCGGCTCGTAAAGCTCTGTTGTTGGAGAAGAACGTGCGTGAGAGTAACTGTTCACGCAGTGACGGTATCCAACCAGAAAGTCACGGCTAACTACGT
336	0	0	0	0	12	0	0	8	9	0.83	Root;Bacteria;Firmicutes	TGGGGAATCTTCCGCAATGGGCGAAAGCCTGACGGAGCAATGCCGCGTGAGTGATGAAGGAATTCGTTCCGTAAAGCTCTTTTGTTTATGACGAATGTGCAGATTGTGAACAATGATTTGTAATGACGGTAGTAAACGAATAAGCCACGGCTAACTACGT
337	0	0	0	0	0	0	0	0	7	0.94	Root;Bacteria;Bacteroidetes;Bacteroidetes;Bacteroidales;Prevotellaceae;Prevotella	TGAGGAATATTGGTCAATGGGCGGAAGCCTGAACCAGCCAAGTAGCGTGCAGGACGACGGCCCTATGGGTTGTAAACTGCTTTTATGCGGGGATAAAGTGGGCCACGTGTGGCCTTTTGCAGGTACCGCATGAATAAGGACCGGCTAATTCCGT
338	0	0	0	0	1	1	0	0	0	0.96	Root;Bacteria;Firmicutes	TGGGGAATCTTCCGCAATGGGCGCAAGCCTGACGGAGCAACGCCGCGTGAGTGAAGAAGGTTTTCGGATCGTAAAGCTCTGTTGAGAGGGACGAGAGGCAGGACTAGGAAATGAGTTTTGTAGGACGGTACCTTTCGAGGAAGCCACGGCTAACTACGT
339	0	0	0	0	0	0	0	3	0	1	Root;Bacteria;Firmicutes;"Clostridia";Clostridiales;Veillonellaceae;Mitsuokella	TGGGGAATCTTCCGCAATGGGCGCAAGCCTGACGGAGCAACGCCGCGTGAGTGAAGAAGGGTTTCGACTCGTAAAGCTCTGTTGTCGGGGACGAATGTCAGGACTCAAAATATGGGTTCTGAATGACGGTACCTGACGAGGAAGCCACGGCTAACTACGT
340	0	0	0	0	0	0	0	0	5	0.93	Root;Bacteria;Bacteroidetes;Bacteroidetes;Bacteroidales;Prevotellaceae;Prevotella	TGAGGAATATTGGTCAATGGGCGAGAGCCTGAACCAGCCAAGTAGCGTGCAGGATGACGGCCCTATGGGTTGTAAACTGCTTTTATAAGGGAATAAAGTGGGGCTCGTGAGCTCCTTTGCATGTACCTTATGAATAAGGACCGGCTAATTCCGT
341	0	0	0	0	0	1	0	0	0	0.96	Root;Bacteria	TGGGGATATTGCACAATGGAGGAAACTCTGATGCAGCAACGCCGCGTGAGGGAAGAAGGACTTCGGTTTGTAAACCTTTGTCTTCGGTGACGATAATGACGGTAGCCGAGGAGGAAGCTCCGACTAACTACGT
342	0	0	0	0	0	1	0	0	0	0.82	Root;Bacteria;Firmicutes;"Bacilli";Bacillales;Bacillaceae;"Bacillaceae 1"	TGGGGAATATTACACAATGGGGGAAACCCTGATGGAGCAACGCCGCGTGAGTGATGAAGGTTTTCGGATCGTAAAACTCTGTTGTTAGGGAAGAACAAGTACCGTTCAAATAGGGCGGTACCGTGACGGTACCTAACCAGAAAGCCACGGCTAACTACGT
343	1	0	0	0	0	0	0	0	0	0.92	Root;Bacteria;Firmicutes;"Bacilli";Bacillales;Bacillaceae;"Bacillaceae 1";Bacillus	TAGGGAATCTTCCGCAATGGACGAAAGTCTGACGGAGCAACGCCGCGTGAGCGAAGAAGGCCTTCGGGTCGTAAAGCTCTGTTGTTAGGGAAGAACAAGTATCGTTCGAATAGGGCGGTACCTTGACGGTACCTAACCAGAAAGCCACGGCTAACTACGT
344	0	0	0	0	0	0	0	0	1	1	Root;Bacteria	TGGAGCATATTGGACAAAGGGCGAAAGCGTGACCCAGCAACTCCGTCGTGAAGGAAGAAGGTGTTCGGATTGTAAACTTATTTTATCAGTGATGAAGTAAGAGACGGTACGTGATGAATAAACCCCGGCTAAATACGT
345	0	0	0	0	0	1	0	0	0	0.95	Root;Bacteria;Firmicutes;"Erysipelotrichi";"Erysipelotrichales";Erysipelotrichaceae;Turicibacter	CAGGGAATCTTCGGCAATGGGCGAAAGCCTGACCGAGCAACGCCGCGTGAATGATGAAGGCCTTCGGGTTGTAAAATTCTGTTATAAGGGAAGAACGACACGGGTAGGAAATGACCTGTGAGTGACGGTACCGGAGGAAAAAGCCACGGCTAACTACGT
346	0	0	0	0	1	0	0	0	0	0.83	Root;Bacteria;Actinobacteria;Actinobacteria;Actinobacteridae;Actinomycetales;Streptosporangineae;Thermomonosporaceae	TGGGGAATCTTGCGCAATGGGCGGAAGCCTGACGCAGCGACGCCGCGTGGGGGATGAAGGCCTTCGGGTTGTAAACCCCTTTCAGTGGGGACGAAGCCTGCCTGTTCGGGTGGGTGACGGTACCTGCAGAAGAAGCACCGGCTAACTACGT
347	0	0	0	0	0	1	0	0	0	0.99	Root;Bacteria;Firmicutes	TAGGGAATCTTCGGCAATGGGGGCAACCCTGACCGAGCAACGCCGCGTGAGTGAAGAAGGTCTTCGGGTCGTAAAGCTCTGTCCTCAAGGAAGATAATGACGGTACTTGAGGAGGAAGCCCCGGCTAACTACGT
348	0	0	0	0	0	0	1	0	0	0.86	Root;Bacteria;Actinobacteria;Actinobacteria;Actinobacteridae;Actinomycetales;Micrococcineae;Microbacteriaceae	TAGGGAATATTGCACAATGGGCGAAAGCCTGATGCAGCAACGCCGCGTGAGGGATGAAGGCCTTCGGGTTGTAAACCTCTTTTAGCAGGGAAGAAGCGAAAGTGACGGTACCTGCAGAAAAAGCACCGGCTAACTACGT
349	0	0	0	0	20	9	0	7	4	0.8	Root;Bacteria;Firmicutes	TGGGGAATATTGGGCAATGGGCGAAAGCCTGACCCAGCAACGCCGCGTGAGGGAAGAAGGGTTTCGGCTCGTAAACCTCTGTCCTATGGGACGAAGGAAGTGACGGTACCATAGGAGGAAGCCCCGGCTAACTACGT
350	0	0	0	0	0	0	0	0	1	0.84	Root;Bacteria;Firmicutes;"Clostridia";Clostridiales	TGGGGAATATTGGGCAATGGGCGCAAGCCTGACCCAGCGACGCCGCGTGAGGGAAGAAGGTCTTCGGATTGTAAACCTCTGTTGACAGGGACGATAATGACGGTACCTGTCGAGGAAGCCACGGCTAACTACGT
351	0	0	0	0	1	1	0	0	0	0.8	Root;Bacteria;Firmicutes;"Clostridia";Clostridiales	TGGGGAATATTGCACAATGGGCGAAGGCCTGATGCAGCAACGCCGCGTGAGCGAAGAAGGTCTTCGGATCGTAAAGCTCTGTCCTTAGGGAAGATAATGACGGTACCTGAGGAGGAAGCCCCGGCTAACTACGT
352	0	0	0	0	0	0	4	0	0	0.86	Root;Bacteria;Proteobacteria;Gammaproteobacteria;Legionellales;Legionellaceae	TGGGGAATATTGGACAATGGGGGGAACCCTGATCCAGCGATGCCGCGTGTGTGAAGAAGGCCTGAGGGTTGTAAAGCACTTTTCAGTGGGGAGGAGATGTTTTAGGTTAAGAGCTAGAGACTGAGACGTTACCCACAGAAGAAGCACCGGCTAACTCCGT
353	0	0	0	0	0	1	0	0	0	0.98	Root;Bacteria;Firmicutes;"Clostridia";Clostridiales;"Lachnospiraceae"	TGAGGAATATTGCACAATGGGGGGAACCCTGATGCAGCGACGCCGCGTGAGCAAAGAAGTATTTCGGTATGTAAAGCTCTATCAGCAGGGAAGAAAAAATGACGGTACCTGACTAAGAAGCACCGACTAAGTACGT
354	0	0	0	0	4	0	0	3	0	1	Root;Bacteria	TGGGGAATATTGCACAATGGGGGAAACCCTGATGCAGCAACGCCGCGTGAAGGATGACGGTTTTCGGATTGTAAACTTCTTTTCTTAGTGACGAAGACAGTGACGGTAGCTAAGGAATAAGCATCGGCTAACTACGT
355	0	0	0	0	0	0	0	0	1	0.81	Root;Bacteria;Bacteroidetes	TGAGGAATATTGGTCAATGGGCGGTAGCCTGAACCAGCCAAGTCGCGTGAGGGACGACGGCCCTACGGGTTGTAAACCTCTTTTGCCGGGGAGCAAGGCGTGCCACGGGTGGCGCGCCGGAGAGTACCCGGAGAAAAAGCATCGGCTAACTCCGT
356	0	0	0	0	0	0	0	0	9	0.83	Root;Bacteria	TAAGGGATATTGGTCAATGGGGGAAACCCTGAACCAGCCATGCCGCGTGAGGGAATGAGGCCCTACGGGTCGTGAACCTCTTTTACTCGGGGACAAGGCGTCGCACGTGATGCGGCGTTGAGGGTACCGAGGGAATAAGCGTCGGCTAACTCCGT
357	0	0	0	0	0	0	0	0	2	0.91	Root;Bacteria;Bacteroidetes	TGAGGAATATTGGTCAATGGCCGGAAGGCTGAACCAGCCAAGTCGCGTGAGGGAAGACGGCCCTACGGGTTGTAAACCTCTTTTGTCGGGGAGCAAAGGCGGTCATGCGTGACCGGATGAGAGTACCCGAAGAAAAAGCATCGGCTAACTCCGT
358	0	0	0	0	0	1	0	0	0	0.85	Root;Bacteria;Bacteroidetes;Bacteroidetes;Bacteroidales;Prevotellaceae;Prevotella	TGGGGAAGTATTGCACAATGGGCGAGAGCCTGAACCAGCCAAGTAGCGTGCAGGATGACGGCCCTATGGGTTGTAAACTGCTTTTATATGGGGATAAAGTGAGCTACGTGTAGCTTATTGCAGGTACCATATGAATAAGGACCGGCTAATTCCGT
359	0	0	1	0	0	0	0	0	0	0.94	Root;Bacteria;Firmicutes;"Clostridia";Clostridiales;Incertae Sedis XI	TGGGAATATTGCACAATGGAGGAAACTCTGATGAAGCGACGCCGCGTGAGTGATAAAGGTTTTCGAATCGTAAAGCTCTGTCCTAAGGGACGATAATGACGGTACCTTAGGAGGAAGCCCCGGCTAACTACGT
360	0	0	0	0	0	0	0	0	10	0.99	Root;Bacteria;Firmicutes;"Clostridia";Clostridiales;"Lachnospiraceae"	TGGGGGATATTGGACAATGGGGGGAACCCTGATCCAGCGACGCCGCGTGAGTGAAGAAGTATCTCGGTATGTAAAGCTCTATCAGCAGGGAAGAAGAAATGACGGTACCTGAGTAAGAAGCCCCGGCTAACTACGT
361	0	0	0	0	0	0	0	18	17	0.95	Root;Bacteria;Firmicutes;"Clostridia";Clostridiales;"Lachnospiraceae";Butyrivibrio	TGGGGGATATTGCACAATGGAGGAAACTCTGATGCAGCGACGCCGCGTGAGTGAAGAAGTATTTCGGTATGTAAAGCTCTATCAGCAGGGAAGAAAGACCTCGAAAGAGGGGATGACGGTACCTGA
362	0	0	0	2	0	0	0	0	0	1	Root;Bacteria;Proteobacteria;Alphaproteobacteria;Caulobacterales;Caulobacteraceae	TAGGGAATCTTGCGCAATGGGCGAAAGCCTGACGCAGCCATGCCGCGTGAATGATGAAGGTCTTAGGATTGTAAAATTCTTTCACCGGGGAAGATAATGACGGTACCCGGAGAAGAAGCCCCGGCTAACTTCGT
363	0	0	0	0	0	0	2	0	0	0.81	Root;Bacteria;Proteobacteria;Alphaproteobacteria;Rhizobiales;Bradyrhizobiaceae	TGGGGAATATTGGACAATGGGGGCAACCCTGATCCAGCCATGCCGCGTGAGTGATGAAGGCCCTAGGGTTGTAAAGCTCTTTTGTGCGGGAAGATAATGACGGTACCGCAGAAGAAGCCCCCGGCTAACTCCGT
364	0	0	0	0	0	0	4	0	0	1	Root;Bacteria;Bacteroidetes	TGAGGAATATTGGTCAATGGGCGCAAGCCTGAACCAGCCATGCCGCGTGCAGGAAGAATGCCCTCTGGGTTGTAAACTGCTTTTATTTGGGAATAAACCTTTCTACGTGTAGAAAGCTGAAGGTACCAAATGAATAAGCACCGGCTAACTCCGT
365	0	0	0	0	3	0	0	5	2	1	Root;Bacteria	TGGGGAATATTGGGCAATGGGCGCAAGCCTGACCCAGCAACGCCGCGTGAAGGAAGAAGGCTTTCGGGTTGTAAACTTCTTTTATGAGGGACGAAGGAAGTGACGGTACCTCATGAATAAGCTCCGGCTAACTACGT
366	0	1	0	0	0	0	0	0	0	0.86	Root;Bacteria	TCAGCCAATCATCGCCAAGTACGACACGCGCAACTATACGGTAAACCTCAACGGCAACATCGAACGAAGCCAGCGGCTCATGGCCGTGGCCTACTACGAGACCAGCGGCAACACACAGAGCGAGCGATTGAACGGAAGCCTCGACCCGAGCGAGGATAACGTGGTGACGAACAACGGCGTGCCGGTGAACGCGACAGGATTCGTTACAACTGTGAACGCCGATGCGCGTCTCACGGCCGGCAGCGAGTACGACCAAGGCGCACGGCTGTACTTCTCGCAGG
367	0	0	0	0	0	1	0	0	0	1	Root;Bacteria	TGGGGAATATTGCACAATGGGCGAAAGCCTGATGCAGCAACGCCGCGTGAGCGATGAAGGCCTTCGGGTCGTAAACTTCTTTTAGCAGGGACGAAGGACGTGACGGTACCTGCAGAAAAAAGCAACGGCTAACTACGT
368	0	0	0	0	30	1	0	2	0	0.83	Root;Bacteria;Bacteroidetes;Bacteroidetes;Bacteroidales	TGAGGAATATTGGTCAATGGACGGGAGTCTGAACCAGCCAAGTCGCGTGAAGGAAGACGGATCTATGGTTTGTAAACTTCTTTAGTGCGGGGAACAAAGCGGCGTCGAGACGCCAGATGAGTGTACCGCAAGAATAAGCATCGGCTAACTCCGT
369	0	0	0	0	0	1	0	0	0	0.84	Root;Bacteria;Bacteroidetes	TGAGGAATATTGGTCAATGGACGAGAGTCTGAACCAGCCAAGTAGCGTGCAGGATGACGGCCCTATGGGTTGTAAAGCTCTATCAGCAGGAAAGAAAATGACGGTACCTGACTAAGAAGCACCGGCTAAATACGT
370	0	0	0	0	0	2	0	0	0	0.98	Root;Bacteria;Firmicutes	TAGGGAATCTTCGGCAATGGGCGAAAGCCTGACCGAGCAACGCCGCGTGAATGATGAAGGCCTTCGGGTTGTAAAATTCTGTCTTCAGGGGACGATAATGACGATACCTGAGGAGGAAGCCACGGCTAACTACGT
371	0	0	0	0	0	0	0	0	2	0.99	Root;Bacteria	TGGGGAATATTGGGCAATGGGCGCAAGCCTGACCCAGCAACGCCGCGTGAGGGAAGAAGGTTTTCGGATTGTAAACCTCTGTCCTTGATGAAAAGAAGAAGATGGTAATCGAGGAGGAAGCCCCGGCTAACTACGT
372	0	0	0	0	1	0	0	0	0	0.94	Root;Bacteria;Cyanobacteria;Cyanobacteria;Chloroplast	TGAGGAATTTTCCGCAATGGGCGAAAGCCTGACGGAGCAATGCCGCGTGAAGGAAGAAGGCTCACGGGTCGTAAACTTCTTTTCTCGGAGAAGAATAAAATGACGGTATCTGAGGAATAAGCATCGGCTAACTCTGT
373	0	0	0	0	0	0	52	0	0	0.92	Root;Bacteria;Proteobacteria;Betaproteobacteria;Burkholderiales;Oxalobacteraceae;Herbaspirillum	TGGGGAATTTTGGACAATGGGGGCAACCCTGATCCAGCAATGCCGCGTGAGTGAAGAAGGCCTTCGGGTTGTAAAGCTCTTTTGTCAGGGGAAGAAACGGTGGTGGCGAATAACTACTACTAATGACGGTACCTGAAGAATAAGCACCGGCTAACTACGT
374	0	0	0	0	0	0	0	0	1	0.98	Root;Bacteria	TTAGGAATATTCGGCAATGGGGGAAACCCTGACCGAGCAATGCCGCGTGTGAGATGAAGGTCCTCTGGATTGTAAATCACTTTTATTTGGGAAGAATTGTAAGTAGAGGAAATGATACTTACTTGACGGTACCTTTTGAATAAGCCCCGGCTAACTACGT
375	0	0	0	0	0	0	0	0	1	0.98	Root;Bacteria;Firmicutes;"Erysipelotrichi";"Erysipelotrichales";Erysipelotrichaceae;Catenibacterium	TAGGGAATTTTCGGCAATGGGGGAAACCCTGACCGAGCAACGCCGCGTGAGCGAAGAAGGCCTTCGGATCGTAAAGCTCTGTTGTAAAGGAAGAACGTCGCATGCGGGAAATGGTGTGCGAGTGACGGTACTTTACCAGAAAGCCACGGCTAACTACGT
376	0	0	0	0	0	1	0	0	0	0.99	Root;Bacteria;Firmicutes;"Clostridia";Clostridiales	TGGGGAATATTGCACAATGGGCGAAAGCCTGATGCAGCGACGCCGCGTGAAGGATGAAGTATTTCGGTATGTAAAGCTCTGTCCTCAAGGAAGATAATGACGGTACTTGAGGAGGAAGCCCCGGCTAACTACGT
377	0	0	0	0	0	2	0	0	0	0.84	Root;Bacteria;Actinobacteria;Actinobacteria;Actinobacteridae;Actinomycetales;Micrococcineae	TGGGGAATATTGCACAATGGGCGCAAGCCTGATGCAGCGACGCCGCGTGCGGGATGGAGGCCTTCGGGTTGTAAACCGCTTTTAGCAGGGAAGAAGCGAAAGTGACGGTACCTGCAGAAAAAGCACCGGCTAACTACGT
378	0	0	0	0	0	2	0	0	0	0.86	Root;Bacteria;Proteobacteria	TGGGGAATCTTGGACAATGGGGGCAACCCTGATCCAGCGACGCCGCGTGGGTGACGAAGGCCTTCGGGTTGTAAAGCCCTTTCGCCGGGGACGACGGTGACGGTACCCGGAGAAGAAGCCCCGGCCAACTCCGT
379	0	0	0	0	0	0	0	1	1	0.81	Root;Bacteria;Firmicutes;"Clostridia";Clostridiales	TGGGGAATATTGGGCAATGGGGGCAACCCTGACCCATCGACGCCGCGTGAGGGAAGACAGCCTTCGGGTTGTAAACCTCTGTTGCAGGGGAAGAAGGACGTGACGGTACCCTGCGAGGAAGCTCCGGCTAACTACGT
380	0	0	0	0	0	1	0	0	0	0.81	Root;Bacteria;Actinobacteria;Actinobacteria;Actinobacteridae	TGGGGAATATTGCACAATGGGCGCAAGCCTGAATGCAGCGACGCCGCGTGGGGGATGACGGCCTTCGGGTTGTAAACTCCTTTCGCCGGGGACGAAGCCTCTTTGGGGGTGACGGTACCCGGATAAGAAGCACCGGCTAACTACGT
381	0	0	0	6	0	0	365	1	0	0.82	Root;Bacteria;Actinobacteria;Actinobacteria;Actinobacteridae;Actinomycetales;Propionibacterineae;Propionibacteriaceae;Propionibacterium	TGGGGAATATTGCACAATGGGCGGAAGCCTGATGCAGCAACGCCGCGTGCGGGATGACGGCCTTCGGGTTGTAAACCGCTTTCGCCTGTGACGAAGCGTGAGTGACGGTAATGGGTAAAGAAGCACCGGCTAACTACGT
382	0	0	0	0	0	0	0	1	0	0.82	Root;Bacteria;Firmicutes	TGGGGAATATTAGGCAATGGGGGAAACCCTGACCTAGCGACGCCGCGTGAGGGAAGACGGTCTTCGGATTGTAAACCTCTGTCTTCAGGGACGAAGAAGATGACGGTACCTGAAGAGGAAGCCACGGCTAACTACGT
383	0	0	0	0	1	1	0	0	0	1	Root;Bacteria	TGGGGAATCTTGCGCAATGGGCGAAAGCCTGACGCAGCAACGCCGCGTGGGGGAAGAAGGCCTTCGGGTTGTAAACCTCTTTCAGCGGGGACGAAGCCTCATGTTGAGTGGGGTGACGGTACCCGCACAAGAAGCACCGGCTAACTACGT
384	0	0	0	0	0	0	0	1	0	1	Root;Bacteria	TGGGGAATCTTGCCCAATGGGCGAAAGCCTGAGGCAGCAACGCCGCGTGTGGGATGAAGGCCCTTGGGTTGTAAACCACTTTCAGCAGGGACGAAAATGACGGTACCTGCAGAAGAAGCCCCGGCCAACTACGT
385	0	0	0	0	0	0	0	2	0	0.82	Root;Bacteria;Firmicutes;"Clostridia";Clostridiales;"Ruminococcaceae"	TGGGGAATATTGCACAATGGAGGAAACTCTGATGCAGCGACGCCGCGTGAGGGAAGAAGGTCTTCGGATTGTAAACCTCTGTTGTCAGGGACGATAATGACGGTACCTGACGAGGAAGCCACGGCTAACTACGT
386	0	0	0	0	0	0	0	1	0	0.81	Root;Bacteria;Firmicutes;"Clostridia";Clostridiales;"Lachnospiraceae"	TGGGGAATATTGCACAATGGGGGAAACCCTGATGCAGCGACGCCGCGTGAAGGAAGAAGTATCTCGGTATGTAAACTTCTATCAGCAGGGAAGATAGTGACGGTACCTAACAAGAAAGCACCGGCTAACTACGT
387	0	0	0	0	2	1	0	0	0	1	Root;Bacteria;Bacteroidetes;Bacteroidetes;Bacteroidales;Bacteroidaceae;Bacteroides	TGAGGAATATTGGTCAATGGACGAGAGTCTGAACCAGTCAAGTAGCGTGAAGGATGACTGCCCTATGGGTTGTAAACTTCTTTTATACGGGAATAAAGTGGTCCACGTGTGGATTTTTGTATGTACCGTATGAATAAGGATCGGCTAACTCCGT
388	0	0	9	0	0	1	0	0	0	0.88	Root;Bacteria;Firmicutes;"Clostridia";Clostridiales;"Lachnospiraceae"	TGGGGAATATTGCACAATGGGTGCAAGCCTGATGCAGCGACGCCGCGTGAAGGATGAAGGTCTTCGGATTGTAAACTTCTATCAGCAGGGAAGAATAAATGACGGTACCTGACTAAGAAGCTCCGGCTAACTACGT
389	0	0	0	0	0	0	0	2	0	0.81	Root;Bacteria;Firmicutes;"Erysipelotrichi";"Erysipelotrichales";Erysipelotrichaceae;Erysipelotrichaceae Incertae Sedis	TAGGGAATTTTCGTCAATGGGGGGAACCCTGAACGAGCAATGCCGCGTGAGTGAAGACGGTCTTCGGATTGTAAAGCTCTGTTGTGAGAGAAAAAGGATATATATAGGAAATGATATGTATTTGATGGTATCTCACCAGAAAGTCACGGCTAACTACGT
390	0	0	11	0	0	0	0	0	0	0.96	Root;Bacteria;Firmicutes;"Clostridia";Clostridiales;Clostridiaceae;"Clostridiaceae 1";Clostridium	TGGGGAATATTGCGCAATGGGGGAAACCCTGACGCAGCAACGCCGCGTGGGTGATGAAGGTTTTCGGATCGTAAAACCCTGTTTTCTGGGACGATAATGACGGTACCAGATGAGGAAGCCACGGCTAACTACGT
391	0	0	0	0	0	0	0	0	1	1	Root;Bacteria	TGGGGAATATTAGGCAATGGGGGCAACCCTGACCTAGCAACGCCGCGTGAAGGAAGAAGGCTTTCGGGTTGTAAACTTCTTTGACGAGGGACGAAGAAAGTGACGGTACCTCGAAAACAAGCCACGGCTAACTACGT
392	0	0	102	0	0	0	0	0	0	0.91	Root;Bacteria;Firmicutes;"Bacilli";Bacillales;Bacillaceae	TAGGGAATCTTCCGCAATGGACGAAAGTCTGACGGAGCGACGCCGCGTGAGTGATGAAGGTCTTCGGATCGTAAAACTCTGTTGTTAGGGAAGAACAAGTACTGGAGTAACTGCCGGTACCTTGACGGTACCTAACCAGAAAGCCCCGGCTAACTACGT
393	0	0	85	9	0	0	0	0	0	0.84	Root;Bacteria;Firmicutes;"Bacilli";Bacillales;Bacillaceae;"Bacillaceae 2"	TAGGGAATCTTCCGCAATGGACGAAAGTCTGACGGAGCGACGCCGCGTGAGTGATGAAGGTCTTCGGATCGTAAAACTCTGTTGTCAGGGAAGAACAAGTATCGGCCTAATACGCCGGCACCTTGACGGTACCTGACCAGAAAGCCCCGGCTAACTACGT
394	0	0	0	0	0	3	0	0	0	0.93	Root;Bacteria;Actinobacteria;Actinobacteria;Coriobacteridae;Coriobacteriales;Coriobacterineae;Coriobacteriaceae	TGGGGAATCTTGCGCAATGGGGGCAACTCTGACGCAGCGACGCCGCGTGCGGGATGGAGGCCTTCGGGTCGTAAACCGCTTTCAGCAGGGACGAGAGGAGACGGTACCTGCAGAAGAAGCCCCCGGCTAACTACGT
395	0	0	0	0	0	1	0	0	0	0.89	Root;Bacteria;Firmicutes	TGGGGAATATTGCACAATGGGGGAAACCCTGATGCAGCAACGCCGCGTGAGTGATGACGGCCTTCGGGTTGTAAAACCCTGTTGTTAGAGAAGAAAGTGCGTGAGAGTAACTGTTCACGTTTCGACGGTATCTAACCAGAAAGCCACGGCTAACTACGT
396	0	0	0	0	6	0	0	0	1	0.96	Root;Bacteria;Firmicutes;"Clostridia";Clostridiales;"Lachnospiraceae"	TGGGGAATATTGCACAATGGGGGAAACCCTGATGCAGCGACGCCGCGTGAGTGAAGAAGTTTTTCGGAATGTAAAGCTCTATCAGCAGGGAAGAAGTAAAACGGTACCTGACTAAGAAGCCCCGGCTAACTACGT
397	0	0	0	0	0	0	0	0	1	1	Root;Bacteria	TGGGGGATATTGCACAATGGGCGAAAGCCTGATGCAGCGACGCCGCGTGAGGGAAGACGGTTTTCGGATTGTAAACCTCTGTCGCAGGGGACGAAGGAAGTGACGGTACCCTGTAAGAAAGCCCCGGCTAACTACGT
398	0	0	0	0	0	0	0	0	1	1	Root;Bacteria	TGGGGAATATTGGGCAATGGGCGAAAGCCTGACCCAGCAACGCCGCGTGAAGGAAGAAGGCTTTCGGGTTGTAAACTTCCTTTGTCAGGGACGAAACAAATGACGGTACCTGACGAATAAGCCACGGCTAACTACGT
399	0	0	1	0	0	0	0	0	0	1	Root;Bacteria	TAGGGAATCTTCCGCAATGGACGCAAGTCTGACGGAGCGACGCCGCGTGAGTGATGAAGGTCTTCGGATCGTAAACCGCTTTTGTCAGGGAAGAATCCTTTGGGCTAATAACTCGGAGGGATGACGGTACCTGAAGAATAAGCACCGGCTAACTACGT
400	0	0	0	0	0	0	0	0	1	1	Root;Bacteria	TGGGGAATATTGGGCAATGGGCGAAAGCCTGACCCAGCGACGCCGCGTGAAGGATGAAGGTCTTCGGATTGTAAACCTCAGTCGCAGGGGACGAAGGAAGTGACGGTACCCTGCAAGAAAGCCCCGGCTAACTACGT
401	0	0	0	0	1	1	0	0	1	0.88	Root;Bacteria;Bacteroidetes;Bacteroidetes;Bacteroidales;Prevotellaceae;Prevotella	TGAGGAATATTGGTCAATGGGCGGAAGCCTGAACCAGCCAAGTAGCGTGAAGGATGACTGCCCTATGGGTTGTAAACTTCTTTTATGCGGGGATAAAGTTCGCCACGTGTGGCGTTTTGCAGGTACCGCATGAATAAGGACCGGCTAATTCCGT
402	0	0	0	0	0	0	0	1	3	0.85	Root;Bacteria;Firmicutes;"Clostridia";Clostridiales	TGGGGAATCTTCCGCAATGGGCGAAAGCCTGACGGAGCAATGCCGCGTGAGTGAAGAAGGCCTTCGGGTTGTAAAGCTCTATCCTTGTCCAAGAGAGCAGAGTATAGTAACTGATAGTCTGAGGACGGTAGACAAGAAGGAAGCCCCGGCTAACTATGT
403	0	0	0	0	0	91	0	0	3	0.94	Root;Bacteria;Firmicutes;"Bacilli";"Lactobacillales";Lactobacillaceae;Lactobacillus	TAGGGAATCTTCCACAATGGGCGAAAGCCTGATGGAGCAACGCCGCGTGGGTGAAGAAGGTCTTCGGATCGTAAAACCCTGTTGTTAGAGAAGAAAGTGCGTGAGAGTAACTGTTCACGTTTCGACGGTATCTAACCAGAAAGCCACGGCTAACTACGT
404	0	0	0	0	0	0	1	0	0	0.8	Root;Bacteria;Proteobacteria;Betaproteobacteria;Burkholderiales	TGGGGAATATTGGACAATGGGGGGAACCCTGATCCAGCCATGCCGCGTGTGTGAAGAAGGCCTTATGGTTGTAAACTGCTTTTGTACGGAACGAAAAGCCCTGGGTTAATACCCTGGGGTCATGACGGTACCGTAAGAATAAGCACCGGCTAACTACGT
405	0	0	2	0	0	0	0	0	0	0.89	Root;Bacteria;Firmicutes;"Bacilli";Bacillales;Bacillaceae	TGGGGAATATTGCGCAATGGGGGAAACCCTGACGCAGCAACGCCGCGTGAGTGATGAAGGTCTTCGGATCGTAAAACTCTGTTGTCAGGGAAGAACAAGTGCCGTTCGAATAGGGCGGTACCTTGACGGTACCTAACCAGAAAGCCCCGGCTAACTACGT
406	0	0	0	0	0	14	0	1	0	0.97	Root;Bacteria;Bacteroidetes;Bacteroidetes;Bacteroidales;Bacteroidaceae;Bacteroides	TGAGGAATATTGGTCAATGGACGAGAGTCTGAACCAGCCAAGTAGCGTGAAGGATGAAGGTCCTACGGATTGTAAACTTCTTTTATAAGGGGAATAAAACCTTCCACGTGTGGGGGCTTGTATGTACCTTATGAATAAGCATCGGCTAACTCCGT
407	0	0	0	0	0	0	1	0	0	0.82	Root;Bacteria;Firmicutes	TTAGGAATATTCGTCAATGGGGGAAACCCTGAACGAGCAATGCCGCGTGAGTGATGAAGGTCCTTTGGATCGTAAAGCTCTGTTGTAAAAGGACGAAACCTTATCATAGGTAATGATGATAAGCTGACGGTACTTTACCAGAAAGCCCCGGCTAACTACGT
408	0	0	0	0	0	1	0	0	0	0.95	Root;Bacteria;Firmicutes;"Clostridia";Clostridiales	TGGGGATATTGCACAATAGGGGAAACCCTGATGCAGCGACGCCGCGTGGAGGAAGAAGGTTTTCGAATTGTAAACTCCTGTCGTTAGGGACGATAATGACGGTACCTGAGGAGGAAGCCACGGCTAACTACGT
409	0	0	0	0	0	0	18	0	0	0.93	Root;Bacteria;Bacteroidetes;Flavobacteria;Flavobacteriales;Flavobacteriaceae;Flavobacterium	TGAGGAATATTGGTCAATGGGCGCAAGCCTGAACCAGCCATGCCGCGTGCAGGATGACGGTCCTATGGATTGTAAACTGCTTTTGCACAGGAAGAAACACTGATTCGTGAATCAGCTTGACGGTACTGTGAGAATAAGGATCGGCTAACTCCGT
410	0	0	0	0	0	0	2	0	0	1	Root	GTATCTCAAGCAGGGAGTCGAAGCCAAAGAGGGAGAGCTTCTGGAACTGGGGCTTTGCTAGGGCCCTCAGGCATGCTCCCTCAGGGGAGGTTGTGCATTGATTGGTTTAGAGGAAACACGTGCAAAGGGGGACGTTATTGACAGGACTCTGGTGTTGATCATTAGGTTCAATCATG
411	0	0	0	0	0	1	0	0	0	1	Root	CAGGCTGGCCGGTGCCCCGTTCGTGAAGGTCGAGGCGTCCAAGTTCACGGAGGTCGGCTATGTAGGCCGGGACGTCGAGTCGATGGTTAGAGATCTCGTGGATGTAGCGGTGAACATGGTCCGCGAGGAGCGCGAGGAGGAGGTCGAGGAGATCGCGGAGGAGCGGGTCGAGGAACGGCTGCTGGACCTG
412	0	0	0	0	0	0	2	0	0	1	Root;Bacteria;Firmicutes;"Bacilli";Bacillales;Incertae Sedis XI;Gemella	TAGGGAATCTTCCGCAATGGGCGAAAGCCTGACGGAGCAACGCCGCGTGAGTGAAGAAGGATTTCGGTTCGTAAAGCTCTGTTGTTAGGGGAAGAATGGATATGTAGTAACTATACATGTAAGAGACGGTACCTAACCAGAAAGCCACGGCTAACTACGT
413	0	0	0	0	0	0	1	0	0	0.99	Root;Bacteria;Bacteroidetes;Sphingobacteria;Sphingobacteriales	TAAGGAATATTGGTCAATGGACGCAAGTCTGAACCAGCCATGCCGCGTGGAGGATGAAGGTCCTCTGGATTGTAAACTTCTTTTATTTGGGAAGAAACCACCGATTTCTATTGGTGTTGACGGTACCAGATGAATAAGCACCGGCTAACTCCGT
414	0	0	0	0	0	1	0	0	0	0.82	Root;Bacteria;Firmicutes;"Bacilli"	TAGGGAATCTTCGGCAATGGGGGCAACCCTGACCGAGCAACGCCGCGTGAGTGAAGAGGGTTTTCGGATCGTAAAGCTCTGTTGTAAGAGAAGAACGTGTGTGAGAGTGGAAAGTTCACACAGTGACGGTACTTGAGGAGGAAGCCCCGGCTAACTACGT
415	0	0	0	0	196	44	0	38	11	0.98	Root;Bacteria;Firmicutes;"Clostridia";Clostridiales;"Ruminococcaceae";Subdoligranulum	TGGGGGATATTGCACAATGGGGGAAACCCTGATGCAGCGACGCCGCGTGGAGGAAGAAGGTTTTCGGATTGTAAACTCCTGTCGTTAGGGACGATAATGACGGTACCTAACAAGAAAGCACCGGCTAACTACGT
416	0	0	0	0	0	0	1	0	0	0.97	Root;Bacteria;Proteobacteria	TGGGGAATATTGGACAATGGGGGGAACCCTGATCCAGCCATGCCGCGTGTGTGAAGAAGGCCTTATGGTTGTAAAGCACTTTAAGCGAGGAGGAGGCTCTGGCTAATACCTGGGACTCATGACGGTACCTGAAGAATAAGCACCGGCTAACTACGT
417	0	0	0	0	5	0	0	0	0	0.85	Root;Bacteria;Bacteroidetes;Bacteroidetes;Bacteroidales;Prevotellaceae	TGAGGAATATTGGTCAATGGGCGTAAGCCTGAACCAGCCAAGTAGCGTGAGGGATGACTGCCCTATGGGTTGTAAACCTCTTTTGTTTGGGAATAAAGTGGGCCACGTGTGGTCTATTGCATGTACCATTTGAATAAGGACCGGCTAATTCCGT
418	0	0	0	0	0	13	0	0	0	0.81	Root;Bacteria;Firmicutes	TAGGGAGTTTTCGGCAATGGGGGAAACCCTGACCGAGCAACGCCGCGTGAGTGATGAAGGTCTTCGGATTGTAAAGCTCTGTTGCGAGGGGAAGAACGGCCCGCCCAGGAAATGGGGCGGGTTTGACGGTACCTCGCCAGAAAGTGACGGCTAACTACGT
419	0	0	0	0	0	154	0	0	0	1	Root;Bacteria;Firmicutes;"Clostridia";Clostridiales	TGGGGAATATTGCACAATGGGGGAAACCCTGATGCAGCAACGCCGCGTGAGTGATGAAGGTTTTCGGATCGTAAAGCTCTGTCTTTGGGGAAGATAATGACGGTACCCAAGGAGGAAGCCACGGCTAACTACGT
420	0	0	2	0	0	0	0	0	0	0.84	Root;Bacteria;Firmicutes;"Bacilli";Bacillales;Bacillaceae	TAGGGAATCTTCCGCAATGGACGAAAGTCTGACGGAGCGACGCCGCGTGAGTGATGAAGGTCTTCGGATCGTAAAACTCTGTTGTTAGGGAAGAATAAGTACGGACCGAAAAGGTCAGTACCTTGACGGTACCTAACCAGAAAGCCCCGGCTAACTACGT
421	0	0	0	0	2	8	0	0	0	0.91	Root;Bacteria;Firmicutes;"Bacilli";Bacillales;Planococcaceae;Planococcus	TAGGGAATCTTCCGCAATGGACGAAAGTCTGACGGAGCAACGCCGCGTGAGTGACGAAGGTTTTCGGATCGTAAAACTCTGTTGTGAGGGGAAGAACAAGTGCCAATTAACTACTGGCACCTTGACGGTACCTCACCAGAAAGCCACGGCTAACTACGT
422	0	0	0	0	0	1	0	0	0	0.96	Root;Bacteria;Firmicutes;"Clostridia";Clostridiales	TGGGGAATATTGCGCAATGGGGGAAACCCTGATGCAGCAACGCCGCGTGAGTGATGGCGGCCTTCGGGTTGTAAAGCTCTGTCTTCAGGGACGATAATGACGGTACCTGACTAAGAAGCACCGGCTAAATACGT
423	0	0	0	0	0	0	1	0	0	0.91	Root;Bacteria;Proteobacteria;Gammaproteobacteria	TGGGGAATTTTGGACAATGGGGGCAACCCTGATCCAGCAATGCCGCGTGTGTGAAGAAGGCCTTCGGGTTGTAAAGCACTTTAAGCGAGGAGGAGGGTACTGGTATTAATACTACCAGCTACTGGACGTTACTCGCAGAATAAGCACCGGCTAACTCTGT
424	0	0	0	0	0	1	0	0	0	0.9	Root;Bacteria;Bacteroidetes;Bacteroidetes;Bacteroidales;Bacteroidaceae;Bacteroides	TGAGGAATATTGGTCAATGGACGAGAGTCTGAACCAGCCAAGTAGCGTGAAGGATGAAGGTCCTACGGATTGTAAACTTCTTTTATAAGGGAATAAAACCTCCCACGTGTGGGAGCTTGTATGTACCTTATGAATAAGGACCGGCTAATTCCGT
425	0	0	0	0	0	0	1	0	0	0.83	Root;Bacteria;Firmicutes;"Bacilli";Bacillales;"Staphylococcaceae";Staphylococcus	TGGGGAATTTTGGACAATGGGCGAAAGCCTGATCCAGCAATGCCGCGTGTGTGATGAAGGTCTTCGGATCGTAAAACTCTGTTATTAGGGAAGAACAAACGTGTAAGTAACTGTGCACGTCTTGACGGTACCTAATCAGAAAGCCACGGCTAACTACGT
426	0	0	0	0	1	3	0	6	1	0.99	Root;Bacteria;Firmicutes;"Clostridia";Clostridiales;"Lachnospiraceae"	TGGGGAATATTGCACGGTGGGGGAAACCCTGATGCAGCGACGCCGCGTGAGCGATGAAGTATTTCGGTATGTAAAGCTCTATCAGCAGGGAAGAAAATGACGGTACCTGACTAAGAAGCACCGGCTAAATACGT
427	0	0	0	0	2	0	416	0	0	1	Root;Bacteria;Cyanobacteria;Cyanobacteria;Chloroplast;Streptophyta	TGGGGAATTTTCCGCAATGGGCGAAAGCCTGACGGAGCAATGCCGCGTGGAGGTAGAAGGCCCACGGGTCGTGAACTTCTTTTCCCGGAGAAGAAGCAATGACGGTATCTGAGGAATAAGCATCGGCTAACTCTGT
428	0	0	0	0	0	0	0	0	1	0.98	Root;Bacteria;Spirochaetes;Spirochaetes;Spirochaetales;Spirochaetaceae;Treponema	CTAAGAATATTCCGCAATGGACGAAAGTCTGACGGAGCGACGCCGCGTGGATGAAGAAGGTCGGAAGATTGTAAAATCCTTTTAAGCATGAGGAATAAGGGTGAAGAGAGAAACTTCATTTGGTGACTGTAGTGCTTGAATAAGCAACGGCTAATTACGT
429	0	0	0	0	0	0	6	0	0	0.99	Root;Bacteria;Actinobacteria;Actinobacteria;Actinobacteridae;Actinomycetales;Micrococcineae;Micrococcaceae;Rothia	TGGGGAATATTGCACAATGGGCGCAAGCCTGATGCAGCGACGCCGCGTGAGGGATGACGGCCTTCGGGTTGTAAACCTCTGTTAGCATCGAAGAAGCGAAAGTGACGGTAGGTGCAGAGAAAGCGCCGGCTAACTACGT
430	0	0	0	0	44	2	0	1	0	1	Root;Bacteria	TGGGGAATATTGCACAATGGGCGCAAGCCTGATGCAGCAACGCCGCGTGGAGGAAGACGGTTTTCGGATTGTAAACTCCTGTTCTTAGTGAAGAATAATGACGGTAGCTAAGGAGCAAGCCACGGCTAACTACGT
431	0	0	0	0	0	0	125	0	0	0.96	Root;Bacteria;Proteobacteria;Gammaproteobacteria;Pseudomonadales;Moraxellaceae;Acinetobacter	TGGGGAATATTGGACAATGGGGGGAACCCTGATCCAGCCATGCCGCGTGTGTGAAGAAGGCCTTATGGTTGTAAAGCACTTTAAGCGAGGAGGAGGCTCTTCTAGTTAATACCTAGGATGAGTGGACGTTACTCGCAGAATAAGCACCGGCTAACTCTGT
432	0	0	0	3	0	0	54	0	0	0.85	Root;Bacteria;Bacteroidetes	TAAGGAATATTGGACAATGGACGCAAGTCTGATCCAGCCATGCCGCGTGAAGGATTAAGGTCCTCTGGATTGTAAACTTCTTTTATAGGGGAAGAAAAGCAGAGATTCTTCTTTGTCTGACGGTACCCTATGAATAAGCACCGGCTAACTCCGT
433	0	0	0	0	1	0	0	0	0	0.98	Root;Bacteria;Firmicutes;"Clostridia";Clostridiales;"Lachnospiraceae"	TGGGGAATATTGCACAATGGAGGAAACTCTGATGCAGCGACGCCGCGTGAGTGAAGAAGTATTTCGGTATGTAAAGCTCTATCAGCAGGGAAGATAGTGACGGTATCCGTTTAGAAAGCCACGGCTAACTACGT
434	0	0	0	0	2	0	0	0	0	0.97	Root;Bacteria;Bacteroidetes;Bacteroidetes;Bacteroidales;Prevotellaceae	TGAGGAATATTGGTCAATGGGCGCGAGCCTGAACCAGCCAAGTAGCGTGCAGGATGACGGCCCTATGGGTTGTAAACTGCTTTTATAGGGGGATAAAGTGTGGTACGTGTATCATATTGCAGGTACCCTATGAATAAGGACCGGCTAATTCCGT
435	0	0	0	0	1	0	0	0	0	0.88	Root;Bacteria;Actinobacteria;Actinobacteria;Actinobacteridae;Actinomycetales	TGAGGAATATTGGTCAATGGGCGGAAGCCTGACGCAGCGACGCCGCGTGGGGGATGACGGCCTTCGGGTTGTAAACCTCTTTCGGCCCCGACGAAGCGTTATTGTGACGGTAGGGGTGGAAGAAGCACCGGCCAACTACGT
436	0	0	0	0	0	0	3	0	0	0.99	Root;Bacteria;Acidobacteria;Acidobacteria;Acidobacteriales;Acidobacteriaceae;Gp1	TGGGGAATTTTGCGCAATGGGGGAAACCCTGACGCAGCAACGCCGCGTGGAGGATGAAGTCTCTTGGGACGTAAACTCCTTTCGATAGGGGAAGATAATGACGGTACCTATAGAAGAAGCCCCGGCTAACTTCGT
437	0	0	0	0	0	0	13	0	0	0.98	Root;Bacteria;Proteobacteria;Betaproteobacteria;Burkholderiales;Comamonadaceae	TGGGGAATTTTGGACAATGGGCGAAAGCCTGATCCAGCAATGCCGCGTGTAGGATGAAGGCCCTCGGGTTGTAAACTACTTTTGTACGGAACGAAAAGACTCTCTCTAATAAAGAGGGTCCATGACGGTACCGTAAGAATAAGCACCGGCTAACTACGT
438	0	0	0	0	0	2	0	0	0	0.84	Root;Bacteria;Firmicutes;"Bacilli";"Lactobacillales"	TAGGGAATCTTCCACAATGGGCGAAAGCCTGATGGAGCAACGCCGCGTGAGTGAAGAAGGTTTTCGGATCGTAAAGCTCTGTTGTTGGTGAAGAAGGACATGAGTAGTAACTGGCTCATGTTTGACGGTAATCAACCAGAAAGTCACGGCTAACTACGT
439	0	0	0	0	0	0	21	0	0	1	Root;Bacteria;Proteobacteria;Gammaproteobacteria;Pseudomonadales;Pseudomonadaceae;Pseudomonas	TGGGGAATATTGGACAATGGGCGAAAGCCTGATCCAGCCATGCCGCGTGTGTGAAGAAGGTCTTCGGATTGTAAAGCACTTTAAGTTGGGAGGAAGGGTTGTAGATTAATACTCTGCAATTTTGACGTTACCGACAGAATAAGCACCGGCTAACTCTGT
440	0	0	0	0	0	0	2	0	0	0.97	Root;Bacteria;Proteobacteria;Gammaproteobacteria;Pseudomonadales;Moraxellaceae;Acinetobacter	TGGGGAATATTGGACAATGGGCGAAAGCCTGATCCAGCCATGCCGCGTGTGTGAAGAAGGCCTTTTGGTTGTAGAGCACTTTAAGCGAGGAGGAGGCTACCGAGATTAATACTCCTGGATAGTGGACGTTACTCGCAGAATAAGCACCGGCTAACTCTGT
441	0	0	0	0	0	10	0	114	72	1	Root;Bacteria;Firmicutes;"Erysipelotrichi";"Erysipelotrichales";Erysipelotrichaceae;Catenibacterium	TAGGGAATTTTCGGCAATGGGGGAAACCCTGACCGAGCAACGCCGCGTGAGCGAAGAAGGCCTTCGGGTCGTAAAGCTCTGTTGTAAAGGAAGAACGTCGGACACAGGAAATGGTGTGCGAGTGACGGTACTTTACCAGAAAGCCACGGCTAACTACGT
442	0	0	0	0	2	2	0	0	0	0.96	Root;Bacteria;Firmicutes;"Clostridia";Clostridiales	TGGGGAATATTGCACAATGGGTGAAAGCCTGATGCAGCAACGCCGCGTGAGCGATGAAGGCCTTCGGGTCGTAAAGCTCTGTCCTCAAGGAAGATAATGACGGTACCTGACTAAGAAGCTCCGGCTAAATACGT
443	0	0	0	0	1	0	0	0	0	0.86	Root;Bacteria;Firmicutes;"Clostridia";Clostridiales;"Lachnospiraceae"	TGGGGAATATTGCACAATGAGGGAAACCCTGATGCAGCGACGCCGCATGAGTGATGAAGTATTTCAGTATGTAAAGCTCTGTCAGCAGGGAAGATAATGACGGTACCTGACTAAGAAGCACCGGCTAAATACGT
444	0	0	0	0	0	1	0	0	0	0.85	Root;Bacteria;Firmicutes;"Clostridia";Clostridiales;"Peptostreptococcaceae";"Peptostreptococcaceae Incertae Sedis"	TGGGGAATATTGCACAATGGGCGAAAGCCTGATGCAGCAACGCCGCGTGAGCGATGAAGGCCTTCGGGTCGTAAAGCTCTGTCCTCAAGGAAGATAATGACGGTACTAAATGAATAAGCTCCGGCTAACTACGT
445	0	0	0	0	0	0	1	0	0	1	Root;Bacteria	TAGGGAATATTGCGCAATGGACGAAAGTCTGACGCAGCCACGCCGCGTGAGTGAGGAAGGCCTTCGGGTTGTAAAGCTCTTTCAATAGGGACGAAGCGCAAGTGACGGTACCATAGAAGAAGCACCGGCCAACTACGT
446	0	0	0	0	0	1	0	0	0	0.97	Root;Bacteria;Proteobacteria	TGGGGAATATTGGACAATGGGCGCAAGCCTGATCCAGCAATGCCGCGTGCGTGAAGAAGGCCTTAGGGTTGTAAAGCGCTTTCACCCGCGAAGATGATGACAGTAGCGGGAGAAGAAGCCCCGGCTAACTCCGT
447	0	0	0	0	0	5	0	0	2	0.82	Root;Bacteria;Actinobacteria;Actinobacteria;Coriobacteridae;Coriobacteriales;Coriobacterineae;Coriobacteriaceae;Eggerthella	TGGGGAATTTTGCGCAATGGGGGCAACCCTGACGCAGCAACGCCGCGTGCGGGACGACGGCCTTCGGGTTGTAAACCGCTTTCAGCAGGGAAGAACCTTGACGGTACCTGCAGAAGAAGCCCCGGCTAACTACGT
448	0	0	0	0	0	1	0	0	0	0.88	Root;Bacteria;Proteobacteria;Gammaproteobacteria	TGAGGAATATTCCACAATGAGCGAAAGCTTGATGGAGCAATGCCGCGTGCAGGATGAAGGCCTTCGGGTTGTAAAGCACTTTCGGAGGGGAGGAATGAAATGACGTTACCCTCAGAAGAAGCACCGGCTAACTCCGT
449	0	0	0	0	0	1	0	0	0	0.88	Root;Bacteria;Bacteroidetes;Bacteroidetes;Bacteroidales;Prevotellaceae	TGGGGAATATTGGTCAATGGGCGAGAACCTGAACCAACCAAGTAGCGTGCAGGATGACGGCCCTATGGGTTGTAAACTGCTTTTATAAGGGAATAAAAGTGAGTCTCGTGAGACTTTTTGCATGTACCTTATGAATAAGGACCGGCTAATTCCGT
450	0	0	0	0	0	0	1	0	0	1	Root;Bacteria;Proteobacteria	TGGGGAATCTTAGACAATGGGGGCGAACCCTGATCTAGCCATGCCGCGTGAGTGATGAAGGCCTTAGGGTTGTAAAGCACTTTAAGTTGGGAGGAAGGGCAGTAAGCTAATACCTTGCTGTTTTGACGTTACCGACAGAATAAGCACCGGCTAACTCTGT
451	0	0	0	0	0	0	1	0	0	1	Root;Bacteria	TGGGGAATATTGGACAATGGGGGCAACCCTGATCCAGCCACGCCGCGTGCGGGATGACGGCCTTCGGGTTGTAAACCGCTTTCGCCTGTGACGAAGCGTGAGTGACGGTAATGGGTAAAGAAGCACCGGCTAACTACGT
452	0	0	0	0	2	0	0	5	1	0.99	Root;Bacteria;Firmicutes;"Clostridia";Clostridiales;"Lachnospiraceae"	TGGGGAATATTGCACAATGGGGGAAACCCTGATGCAGCGACGCCGCGTGGATGAAGAAGTATTTCGGTATGTAAAGTCCTATCAGCAGGGAAGAAAATGACAGTACCTGACTAAGAAGCCCCGGCTAACTACGT
453	0	0	0	0	0	1	0	0	0	0.9	Root;Bacteria	TAGGGGAGTCTTCGACAATGGGGGAAACCCGTGATCGAGCAACACCGCGTGAATGATGAAGGTCTTCGGATTGTAAAACTCTGTTGTAAGGGATAAATGGCTTGGGTAGGTAATGACCTAAGTTTGATAGTACCTTACTAGAAAGCAACGACTAACTTCGT
454	0	0	0	0	0	1	0	0	0	1	Root;Bacteria	TAGGGAATTTTGCGCAATGGGCGAAAGCCTGACGCAGCAACGCCGCGTGGGGGAAGAAGGCTCTCGGGTCGTAAACCCCTTTTGCCGGGGAAGATAATGACGGTACCCGGCGAATAAGCCACGGCTAACTACGT
455	0	0	0	0	0	0	3	0	0	0.98	Root;Bacteria	ACGGAGTTAGCCGGGGCTTCTTCCTCGAGTCCTGTCATGATCGCGCACTCGACGAAAGAGCTTTACAAGCGGCATTGCCCTTCTTCACTCACGCGATATTGCTGGATCGGGCTTTCGCCCATTGTCCAAGATTCCCCA
456	0	0	0	0	0	0	1	0	0	0.97	Root;Bacteria;Proteobacteria	TGGGGAATATTGCACAATGGGCGCAAGCCTGATGCAGCCATGCCGCGTGTGTGAAGAAGGCTTTCGGGTTGTAAAGCACTTTCAGCGAGGAGGAAAGGGTATTGCTAATACCTGGGACTCATGACGGTACCTGAAGAATAAGCACCGGCTAACTACGT
457	0	0	64	133	0	0	0	0	0	0.88	Root;Bacteria;Firmicutes;"Bacilli";Bacillales;Bacillaceae;"Bacillaceae 2"	TAGGGAATCTTCCGCAATGGACGAAAGTCTGACGGAGCAACGCCGCGTGAGTGATGAAGGTCTTCGGATCGTAAAACTCTGTTGTCAGGGAAGAACAAGTCATGTTCGAATAGGGCATGGCCTTGACGGTACCTGACCAGAAAGCCCCGGCTAACTACGT
458	0	0	0	0	1	0	0	0	0	1	Root;Bacteria	TGGGGAATATTGCACAATGGAGGAAACTCTGATGCAGCGACGCCGCGTGAGTGAAGAAGTATTTCGGTATGTAAAGTTCTTTTATTTGGGAAGAAAAACAAATTGACGGTACCAAATGAATAAGCCCCCGGCTAACTACGT
459	0	0	0	0	0	1	0	0	0	1	Root;Bacteria	TGGGGAATATTGCACAATGGGCGAAAGCCTGATGCAGCAACGCCGCGTGAGCGATGAAGGCCTTCGGGTCGTAAACCTCTTTTGTTAGGGAGCAAGGCATTTTGTGTTGAGTGTACCTTTCGAATAAGCACCGGCTAACTACGT
460	0	0	0	0	1	0	0	0	0	0.81	Root;Bacteria;Bacteroidetes;Sphingobacteria;Sphingobacteriales;Sphingobacteriaceae	TAAGGAATATTGGTCAATGGAGGCAACTCTGAACCAGCCATGCCGCGTGCAGGAAGAATGCCCTCTGGGTTGTAAACTGCTTTTATCAGGGAATAAACCCTTCTACGTGTAGGAGGCTGAATGTACCTGAGGAATAAGGATCGGCTAACTCCGT
461	0	0	0	0	0	1	0	0	0	0.93	Root;Bacteria;Firmicutes;"Erysipelotrichi";"Erysipelotrichales";Erysipelotrichaceae;Turicibacter	TAGGGAATCTTCGGCAATGGGCGAAAGCCTGACCGAGCAACGCCGCGTGAATGATGAAGGCCTTCGGGTTGTAAAATTCTGTTATAAGGGAAGAGGAAGGACGGTACCTGCAGAGGAAGCCACGGCTAACTACGT
462	0	0	0	0	6	1	0	0	2	0.84	Root;Bacteria;Actinobacteria;Actinobacteria	TGGGGAATATTGCGCAATGGGCGGAAGCCTGACGCAGCGACGCCGCGTGCGGGATGGAGGCCCCCGGGCCGTAAACCGCTTTCAGCGGGGACGATCGTGACTGTACCCGCAGAAGAAGTCCCGGCTAACTACGT
463	0	0	0	0	7	0	0	0	0	1	Root;Bacteria;Firmicutes;"Clostridia";Clostridiales;"Lachnospiraceae"	TGGGGAATATTGCACAATGGGCGAAAGCCTGATGCAGCGACGCCGCGTGATTGAAGAAGTATTTCGGTATGTAAAGATCTATCAGCAAGGAAGAAAATGACGGTACTTGACTAAGAAGCCCCGGCTAACTACGT
464	0	0	0	0	0	0	8	0	0	0.94	Root;Bacteria;Proteobacteria;Betaproteobacteria;Burkholderiales;Incertae sedis 5;Aquabacterium	TGGGGAATTTTGGACAATGGGCGCAAGCCTGATCCAGCAATGCCGCGTGCAGGAAGAAGGCCTTCGGGTTGTAAACTGCTTTTGTCAGGGAAGAAATCCTCTAGGTTAATACCCTTGGGGGGATGACGGTACCTGAAGAATAAGCACCGGCTAACTACGT
465	0	0	0	0	443	8	0	159	19	1	Root;Bacteria;Firmicutes;"Clostridia";Clostridiales;"Lachnospiraceae"	TGGGGAATATTGCACAATGGAGGAAACTCTGATGCAGCGACGCCGCGTGAGTGAAGAAGTATTTCGGTATGTAAAGCTCTATCAGCAGGGAAGATAGTGACGGTACCTGACTAAGAAGCTCCGGCTAAATACGT
466	0	0	0	0	3	0	0	0	0	1	Root;Bacteria	TAGGGAATTTTCGGCAATGGGGGAAACCCTGACCGAGCAATGCCGCGTGAATGACGAAGGTCTTCGGATCGTAAAATTCTGTTGTTAAAGAAGAACTATGGGATTAGGAAATGAGTTCCATTTGACGGTACTTAACTAGAAAGCCCCGGCTAACTATGT
467	0	0	0	0	126	0	0	0	1	1	Root;Bacteria	TGGGGAATATTGGGCAATGGGGGAAACCCTGACCCAGCAACGCCGCGTGGAGGAAGAAGGTTTTCGGATCGTAAACTCCTGTCCTTGGAGACGAGTAGAAGACGGTATCCAAGGAGGAAGCCCCGGCTAACTACGT
468	0	0	0	0	0	0	0	11	0	1	Root;Bacteria;Firmicutes;"Clostridia";Clostridiales;Veillonellaceae;Dialister	TGGGGAATCTTCCGCAATGGGCGAAAGCCTGACGGAGCAACGCCGCGTGAGTGATGACGGCCTTCGGGTTGTAAAACTCTGTGATCCGGGACGAAAAGGCAGAGTGCGAAGAACAAACTGCATTGACGGTACCGGAAAAGCAAGCCACGGCTAACTACGT
469	0	0	0	0	0	1	0	0	0	0.92	Root;Bacteria;Firmicutes;"Clostridia";Clostridiales	TGGGGAATATTGCACAATGGGCGAAAGCCTGATGCAGCAACGCCGCGTGAGCGATGAAGGCCTTCGGGTCGTAAAGCTCTGTCCTCAAGGAAGATTATGACGGTACCTGCAGAAGAAGCCCCCGGCTAACTACGT
470	0	0	0	0	9	2	0	0	1	0.96	Root;Bacteria;Firmicutes	TAGGGAATTTTCGGCAATGGGGGCAACCCTGACCGAGCAACGCCGCGTGAGTGAAGAAGGTCTTCGGATTGTAAAACTCTGTTGTAAGGGAAGAACGGTGAGATGCATAATCTCAAGTGACGGTACCTTACCAGAAAGCCACGGCTAACTACGT
471	0	0	0	0	1	0	0	0	0	1	Root;Bacteria	TGGGGAATATTGGGCAATGGGCGAAAGCCTGACCCAGCAACGCCGCGTGAAGGAAGAAGGTCTTCGGATTGTAAAACTTCTTTTATGAGGGACGAAGGACGTGACGGTACCTGACTAAGAAGCCCCGGCTAACTACGT
472	0	0	0	0	1	9	0	0	0	1	Root;Bacteria	TGGGGAATATTGGGCAATGGGGGAAACCCTGACCCAGCAACGCCGCGTGAAGGAAGAAGGCCTTCGGGTTGTAAACTTCTTTTAGTAGGGACGAAGAACGTGACGGTACCTACAGAAAAAGCAACGGCTAACTACGT
473	0	0	0	0	0	0	0	0	2	0.82	Root;Bacteria;Firmicutes;"Erysipelotrichi";"Erysipelotrichales";Erysipelotrichaceae	TAGGGAATTTTCGGCAATGGGGGAAACCCTGACCGAGCAACGCCGCGTGAGTGAAGAAGGTCTTCGGATTGTAAAGCTCTGTTGTAAGGGAAGAAATGTACTGTGAGAAACAGTACTTGACGGTACCTTACCAGAAAGCTACGGCTAACTACGT
474	0	0	0	0	0	0	0	0	1	0.86	Root;Bacteria;Firmicutes;"Clostridia";Clostridiales;"Lachnospiraceae"	TGGGGAATATTGCACAATGGGGGAAACCCTGATGCAGCGACGCCGCGTGAGTGATGAAGTATTTCGGTATGTAAAGCTCTTTAAGCAGGGAAGATAATGACGGTACCTGCAGAATAAGCACCGGCTAAATACGT
475	0	0	0	0	0	0	4	0	0	0.96	Root;Bacteria;Proteobacteria;Gammaproteobacteria;Pseudomonadales;Pseudomonadaceae	TGGGGAATATTGGACAATGGGCGAAAGCCTGATCCAGCCATGCCGCGTGTGTGAAGAAGGTCTTCGGGATTGTAAAGCACTTTAAAGTTGGGAGAAGGGCAGTAAGCTAATACCTTGCTGTTTTGACGTTACCGACAGAATAAGCACCGGCTAACTCTGT
476	0	0	0	0	0	1	0	0	0	0.88	Root;Bacteria;Firmicutes;"Bacilli";Bacillales;Bacillaceae;"Bacillaceae 1";Bacillus	TAGGGAATCTTCCGCAATGGACGAAAGTCTGACGGAGCAACGCCGCGTGAGTGATGAAGGTTTTCGGATCGTAAAGCTCTGTTGTTAGGGGAAGAACAAGTATCTGTTGAATAAGCAGGTACCTTGACGGTACCTAACCAGAAAGCCACGGCTAACTACGT
477	0	0	0	0	1	1	0	0	0	0.81	Root;Bacteria;Actinobacteria;Actinobacteria;Actinobacteridae;Actinomycetales;Micrococcineae	TGGGGAATATTGCACAATGGGCGAAAGCCTGATGCAGCGACGCCGCGTGCGGGATGACGGCCTTCGGGTTGTAAACCGCTTTCAGCAGGGAAGAAGCGAAAGTGACGGTACCTGCAGAAGAAGCGCCGGCTAACTACGT
478	0	0	0	0	0	0	1	0	0	1	Root;Bacteria	TAAGGAATATTGGTCAATGGACGCAAGTCTGAACCAGCCATGCCGCGTGGAGGATGAAGGCCCTCTGGGTTGTAAACCGCTTTCGCCTGTGACGAAGCGTGAGTGACGGTAATGGGTAAAGAAGCACCGGCTAACTACGT
479	0	0	0	0	61	14	0	0	5	0.93	Root;Bacteria;Bacteroidetes;Bacteroidetes;Bacteroidales;Prevotellaceae;Prevotella	TGAGGAATATTGGTCAATGGACGAGAGTCTGAACCAGCCAAGTAGCGTGCAGGATGACGGCCCTATGGGTTGTAAACTGCTTTTATAAGGGAATAAAGTTGGAGTCGTGACTCTTTTTGCATGTACCTTATGAATAAGGACCGGCTAATTCCGT
480	0	0	0	0	0	0	0	0	31	0.99	Root;Bacteria	TGAGGAATCTTGCGCAATGGGCGAAAGCCTGACGCAGCGACACCGCGTGAGGGATGAAGGTCTTCGGATTGTAAACCTTTGTCAGTGGGGACGAGAACGGACGGTACCTACTGAGGAAGCATCGGCTTACTACGT
481	0	0	0	0	0	0	0	0	1	0.98	Root;Bacteria	TCTTACGAGTAGCAGCAATGGGGAATATTTGGCAACGAGCGCAAGCGTGTCCCAGCAACGCCTCGTGAAGGAAGAAGGCTTTCGGGTTGTAAAATTATTTTGTCAGAGATGAGCAGAAGTCGGTACCTGAGAAATAAGCCTCTGCTATCTATGT
482	0	0	0	0	0	0	0	0	2	1	Root;Bacteria	TTAGGAATATTCGTCAATGGGGGAAACCCTGAACGAGCAATGCCGCGTGAAGGATGACGGTCCTATGGATTGTAAACTTCTGTTGTTAGGGAAGAACGACTAGTATAGGAAATGATACTAGAGTGACGGTACCTTTCAAGAAAGCTCCGGCTAACTACGT
483	0	0	0	0	0	0	0	0	1	1	Root;Bacteria	TGGGGAATATTGGGCAATGGGCGAAAGCCTGACCCAGCGACGCCGCGTGAGCGAAGAAGGTCTTCGGATTGTAAAGCTCTGTTGATGGGGACAATAATGACGGTACCTATCGAGGAAGCCACGGCTAACTACGT
484	0	0	0	0	0	0	0	0	1	0.8	Root;Bacteria;Actinobacteria;Actinobacteria	TGGGGAATTTTGCGCAATGGAGGCAACTCTGACGCAGCAACGCCGCGTGCGGGATGAAGGCCCTCGGGTTGTAAACCGCTTTCAGCAGGGAAGACTTCGACTGTACCTGCAGAAGAAGCCCCGGCTAACTACGT
485	0	0	0	0	5	0	0	0	0	1	Root;Bacteria	TGGGGAATATTGCACAATGGGGGAAACCCTGATGCAGCAACGCCGCGTGAAGGAAGAAGGCCTTTGGGTCGTAAACTTCTGTTCTAAGGGAAGATGATGACGGTACCTTAGGAGCAAGTCCCGGCTAACTACGT
486	0	0	0	0	34	0	0	0	1	0.89	Root;Bacteria;Bacteroidetes;Bacteroidetes;Bacteroidales	TGAGGAATATTGGTCAATGGGCGAGAGCCTGAACCAGCCAAGTAGCGTGCGGGATGACTGCCCTATGGGTTGTAAACCGCTTTTGATTGGGAACAAAGAGCGCCACGTGTGGTGCGTTGCGTGTACCTTTCGAATAAGCATCGGCTAATTCCGT
487	0	0	0	0	0	0	0	0	1	1	Root;Bacteria	TGGGGAATATTGCGCAATGGGGGCAACCCTGACGCAGCAACGCCGCGTGAAGGATGAAGGCTTTCGGGTCGTAAACTTTTGTCATAAGGGACGAAATATGACGGTACCTTATGAGGAAGCCACGGCTAACTACGT
488	0	0	0	0	4	0	0	0	0	1	Root;Bacteria	TGGGGGATATTGCGCAATGGGGGAAACCCTGACGCAGCAACGCCGCGTGAAGGAAGAAGGCTTTCGGGTTGTAAACTTCTGTTCTTAGGGAAGAAGACAGTGACGGTACCTAAGGAGCAAGTCACGGCTAACTACGT
489	2	0	0	0	1	1	0	0	0	1	Root;Bacteria;Firmicutes;"Bacilli";Bacillales;"Staphylococcaceae";Jeotgalicoccus	TAGGGAATCTTCCGCAATGGACGAAAGTCTGACGGAGCAACGCCGCGTGAGTGATGAAGGGTTTCGGCTCGTAAAACTCTGTTGTTAAGGAAGAATACTCGAGGTAGTAACTGGCCTTGAGATGACGGTACTTAACCAGAAAGCCACGGCTAACTACGT
490	3	0	0	0	0	0	0	0	0	0.85	Root;Bacteria;Firmicutes;"Bacilli";Bacillales;Bacillaceae	TAGGGAATCTTCCGCAATGGACGAAAGTCTGACGGAGCAACGCCGCGTGAGTGATGAAGGTTTTCGGATCGTAAAACTCTGTTGTCAGGGGAAGAACAAGTGCGAGAGTAACTGCTCGCGCCTTGACGGTACCTGACCAGAAAGCCACGGCTAACTACGT
491	0	0	0	0	0	4	0	0	0	0.94	Root;Bacteria;Actinobacteria;Actinobacteria;Actinobacteridae;Bifidobacteriales;Bifidobacteriaceae;Bifidobacterium	TGGGGAATATTGCACAATGGGCGCAAGCCTGATGCAGCGACGCCGCGTGCGGGATGACGGCCTTCGGGTTGTAAACCGCTTTTGATTGGGAGCAAGGCATTTTCGTGTTGAGTGTACCTTTCGAATAAGCACCGGCTAACTACGT
492	0	1	0	0	0	0	0	0	0	0.8	Root;Bacteria	TGGCGGCGTTGGGCGGTTGGAAGCCCGAACTGCTCGAAGAATCGCTCCCAGTCGGCGAGGTCCGACTCATGAGTGGCAATGAATAACGGATAGTCCGTTTCGTCGCGGGCGACTTGGTAGCCGCCCCGGGTCCAGATGTAGACGGCGTCGATAGCGGTGTAGGCGAACTCCATGCCCGCGAACTGGGGGAGGATGTACGCTTCCGAGATGGTGGGCGGAGACACAC
493	1	0	0	0	0	0	0	0	0	0.91	Root;Bacteria;Actinobacteria;Actinobacteria;Actinobacteridae;Actinomycetales	TGGGGAATATTGCACAATGGGCGCAAGCCTGATGCAGCGACGCCGCGTGGGGGATGACGGCCTTCGGGTTGTAAACCCCTTTCGCCCACGACGAAGCCCTTTTAGGGTGACGGTAGTGGGATAAGAAGCACCGGCTAACTACGT
494	0	0	0	0	0	2	0	0	0	0.89	Root;Bacteria;Firmicutes;"Clostridia";Clostridiales	TGGGGGATATTGCGCAATGGGGGAAACCCTGACGCAGCAACGCCGCGTGAAGGATGAAGGTTTTCGGATTGTAAACTTCTTTTATTTAGGACGAAGAATGACGGTACTTGAGGAGGAAGCCCCGGCTAACTACGT
495	0	0	0	0	4	0	0	0	1	1	Root;Bacteria	TGGGGAATATTGGGCAATGGGGGAAACCCTGACCCAGCAACGCCGCGTGAAGGAAGAAGGCTTTCGGGTTGTAAACTTCTTTTACCAGGGACGAAGGACGTGACGGGTACCTGGAGAAAAGCCACGGCTAACTACGT
496	0	0	0	0	0	0	0	0	2	1	Root;Bacteria	TGGGGAATATTGGTCAATGGAGGAAACTCTGAACCAGCGACGCCGCGTGAGGGAAGAAGGTCTTCGGATTGTAAACCTTTGTTGACAGGGACGATACAAGACGGTACCTGTCGAGGAAGCCACGGCTAACTACGT
497	0	0	0	0	0	0	0	0	1	0.96	Root;Bacteria;Firmicutes;"Clostridia";Clostridiales	TGGGGGATATTGCGCAATGGGGGAAACCCTGACGCAGCAACGCCGCGTGAAGGAAGAAGGTCTTCGGATCGTAAACTTCTGTCTTCAGGGACGAATAATGACGGTACCTGAGGAGGAAGCCACGGCTAACTACGT
498	0	0	0	0	0	0	0	0	5	1	Root;Bacteria	TCGAGAATCTTCGGCAATGGACGAAAGTCTGACCGAGCGACGCCGCGTGTATGATGAAGGTCTTCGGATTGTAAAGTACTGTCGATAGGGCGGAAATTTACGGTGGTCATCCATCGTATTTGACCTATCTTTTGAGGAAGGACGGGCTAAGTTCGT
499	0	0	0	0	0	0	1	0	0	0.92	Root;Bacteria;Proteobacteria;Betaproteobacteria;Burkholderiales;Burkholderiaceae	TGGGGAATATTGCACAATGGGGGCAACCCTGATCCAGCAATGCCGCGTGTGTGAAGAAGGCCTTCGGGTTGTAAAGCACTTTTGTCCGGAAAGAAAGCGCTCTGGTTAATACCTGGGGCGGATGACGGTACCGGAAGAATAAGCACCGGCTAACTACGT
500	0	0	0	0	0	1	0	0	0	1	Root;Bacteria;Firmicutes	TAGGGAATCTTCGGCAATGGACGAAAGTCTGACCGAGCAACGCCGCGTGAGTGAAGAAGGTTTTCGGATCGTAAAACTCTGTTGTTAGAGAGGAACGACTTTAGTAGGAAATGGCTAGAGTGTGACGGTACCTTATGAGAAAGCCACGGCTAACTACGT
501	0	0	17	0	402	3542	0	39	12	1	Root;Bacteria;Firmicutes;"Clostridia";Clostridiales;"Peptostreptococcaceae";"Peptostreptococcaceae Incertae Sedis"	TGGGGAATATTGCACAATGGGCGAAAGCCTGATGCAGCAACGCCGCGTGAGCGATGAAGGCCTTCGGGTCGTAAAGCTCTGTCCTCAAGGAAGATAATGACGGTACTTGAGGAGGAAGCCCCGGCTAACTACGT
502	0	0	0	0	3	0	0	0	0	1	Root	GCGCGCAAATTACCCAATCCTGACACAGGGAGGTAGTGACAAGAAATAGCAATGCAGGGCCTTTGGTTCTGCAATTGGAATGAGTAGAGCTTAGAACCCTTTACGAGTATCAATTGGAGGGCAAGTCTGGT
503	0	0	0	0	3	0	0	0	1	0.89	Root;Bacteria;Bacteroidetes	TGAGGAATATTGGTCAATGGGCGGAAGCCTGAACCAGCCATGCCGCGTGAAGGAATGAGGCCCTACGGGTCGTGAACTTCTTTTGTGGCGGAGCAATAAGGGCCACGTGTGGTCCGACGAGAGTACGTCACGAATAAGCACCGGCTAACTCCGT
504	0	0	0	0	17	0	0	0	1	1	Root;Bacteria	TGGGGAATATTGGGCAATGGAGGCAACTCTGACCCAGCAACGCCGCGTGAATGATGAAGGTCTTCGGATTGTAAAGTTCTGTGATGGGGGACGAAGAAAGTGACGGTACCCCAATAGCAAGCTACGGCTAACTACGT
505	0	0	0	0	0	0	1	0	0	0.84	Root;Bacteria;Proteobacteria;Betaproteobacteria;Burkholderiales	CGGGGAATTTTCCGCAATGGGCGAAAGCCTGATCCAGCAATGCCGCGTGAGTGAAGAAGGCCCTCGGGTTGTAAAGCTCTTTTGTCAGGGAAGAAAAGGTATCTCCTAATACGGGGTACTGATGACGGTACCTGAAGAATAAGCACCGGCTAACTACGT
506	0	0	0	0	0	0	23	0	0	1	Root;Bacteria	TAGGGAATATTGCGCAATGGACGAAAGTCTGACGCAGCCACGCCGCGTGAGTGAGGAAGGCCTTCGGGTTGTAAAGCTCTGTCATCCGGGAAAACGGCTATCTGGGGAAAGTTCAGGTAGCGTGATGGTACCGGAGGAGGAAGCACCGGCAAACTCTGT
507	0	0	0	0	0	0	0	0	1	1	Root;Bacteria;Firmicutes;"Clostridia";Clostridiales;"Lachnospiraceae"	TGGGGAATATTGCACAATGGGGGAAACCCTGATGCAGCGACGCCGCGTGAAGGAAGAAGTATCTCGGTATGTAAAGCTCTATCAGCAGGGAAGATAATGACGGTACCTGACTAAGAAGCTCCGGCTAAATACGT
508	0	0	0	0	0	2	0	0	0	0.84	Root;Bacteria;Firmicutes;"Bacilli";Bacillales;Planococcaceae;Sporosarcina	TAGGGAATCTTCCACAATGGACGAAAGTCTGATGGAGCAACGCCGCGTGAGCGAAGAAGGTTTTCGGATCGTAAAGCTCTGTTGTGAGGGAAGAACAAGTATGGGGAGTAACTGCCCGTGCCTTGACGGTACCTCATTAGAAAGCCAACGGCTAACTACGT
509	0	0	0	0	0	2	0	1	5	0.93	Root;Bacteria;Firmicutes;"Clostridia";Clostridiales	TGGGGAATATTGCACAATGGGGGAAACCCTGATGCAGCGACGCCGCGTGGAGGAAGAAGGTCTTCGGATTGTAAACTCCTGTCGTTGGGGACGATAATGACGGTACCCAACAAGAAAGCCACGGCTAACTACGT
510	0	0	0	0	0	0	1	0	0	0.89	Root;Bacteria;Proteobacteria;Gammaproteobacteria	TGGGGAATATTGGACAATGGGCGAAAGCCTGATCCAGCCATGCCGCGTGTGTGAAGAAGGTCTTCGGATTGTAAAGCACTTTAAGTTGGGAGGAAGGGCAGTTGCCCTAATATGGCGGGGGGATGACGGTACCGGAAGAATAAGCACCGGCTAACTACGT
511	0	0	0	0	1	1	0	0	0	1	Root;Bacteria	TGGGGAATCTTGCGCAATGGGCGAAAGCCTGACGCAGCGACGCCGCGTGGGGGAAGAAGGCCTTCGGGTTGTAAACCCCTTTCGGTGGGGACGAAGCCTGCTTTGCAGGTGACGGTACCTACAAAAGAAGCACCGGCTAACTACGT
512	0	0	0	0	166	10	0	99	4	1	Root;Bacteria;Firmicutes;"Clostridia";Clostridiales;"Lachnospiraceae"	TGGGGAATATTGCACAATGGGGGAAACCCTGATGCAGCGACGCCGCGTGAGTGATGAAGTATTTCGGTATGTAAAACTCTATCAGCAGGGAAGATAATGACGGTACCTGACTAAGAAGCACCGGCTAAATACGT
513	0	0	0	0	0	0	3	0	0	0.99	Root;Bacteria;Cyanobacteria;Cyanobacteria;Family I;GpI	TGGGGAATTTTCCGCAATGGGCGAAAGCCTGACGGAGCAATACCGCGTGAGGGAGGAAGGCTCTTGGGTTGTAAACCTCTTTTCTCAGGGAAGAAAAAATGACGGTACCTGAGGAATCAGCATCGGCTAACTCCGT
514	0	0	0	0	0	0	0	0	1	1	Root;Bacteria	TCGGGAATATTGCGCAATGGAGGAAACTCTGACGCAGTGACGCCGCGTATAGGAAGAAGGTTTTCGGATTGTAAACTATTGTCGTGAGGGAAGAAATTGACAGTACCTCAGGAGGAAGCTCCGGCTAACTATGT
515	0	0	0	0	0	1	0	0	0	0.96	Root;Bacteria;Bacteroidetes;Sphingobacteria;Sphingobacteriales;Sphingobacteriaceae	TAAGGAATATTGGTCAATGGAGGCAACTCTGAACCAGCCATGCCGCGTGCAGGATGACTGCCCTATGGGTTGTAAACTGCTTTTGTCTGAGAATAAACCTACTTACGTGTAAGTAGCTGAATGTACCAGAAGAATAAGGATCGGCTAACTCCGT
516	0	0	0	0	1	0	0	0	0	1	Root;Bacteria	TGGGGAATATTGGGCAATGGGCGAAAGCCTGACCCAGCAACGCCGCGTGAAGGAAGAAGGTCTTCGGATTGTAAACTTCTTTTATCAGGGACGAAGAAAAGTGACGGTACCTGGAGAAAAAGTCACGGCTAACTACGT
517	0	0	0	0	2	0	0	0	0	1	Root;Bacteria	TGGGGAATATTGCACAATGGGGGGAAACCCTGATGCAGCAACGCCGCGTGAGGAAAGAAGGTTTTCGGATTGTAAACCTCTGTCCCTGGTGACGAAGACAGTGACGGTAACCAGGGAGGAAGCCACGGCTAACTACGT
518	0	0	0	0	0	0	3	0	0	0.97	Root;Bacteria;Proteobacteria;Betaproteobacteria;Burkholderiales;Burkholderiaceae;Ralstonia	TGGGGAATTTTGGACAATGGGGGCAACCCTGATCCAGCAATGCCGCGTGTGTGAAGAAGGCCTTCGGGTTGTAAAGCACTTTTGTCCGGAAAGAAATCGCACTTACTAATATTAGGTGTGGATGACGGTACCGGAAGAATAAGGACCGGCTAACTACGT
519	0	0	0	0	3	0	0	0	0	1	Root;Bacteria;Firmicutes;"Clostridia";Clostridiales;"Lachnospiraceae"	TGGGGAATATTGCACAATGGAGGAAACTCTGATGCGGCAACGCCGCGTGAGTGAAGAAGTATTTCGGTATGTAAAGCTCTATCAGCAGGAAAGAAAATGACGGTACCTGACTAAGAAGCCCCGGCTAACTACGT
520	0	0	0	0	1	0	0	0	0	0.97	Root;Bacteria;Actinobacteria;Actinobacteria;Actinobacteridae;Actinomycetales	TGGGGAATATTGCACAATGGGCGCAAGCCTGATGCAGCGACGCCGCGTGGGGGATGACGGCCTTCGGGTTGTAAACCTCTTTCGCCATCGACGAAGCCTTTCGGGGTGACGGTAGGTGGAGAAGAAGCACCGGCTAAATACGT
521	0	0	0	0	0	0	8	0	0	0.99	Root;Bacteria;Bacteroidetes;Flavobacteria;Flavobacteriales;Flavobacteriaceae;Chryseobacterium	TGAGGAATATTGGACAATGGGTGAGAGCCTGATCCAGCCATCCCGCGTGAAGGACGACGGCCCTATGGGTTGTAAACTTCTTTTGTGTAGGGATAAACCTTTCCACGTGTGGAAAGCTGAAGGTACTATACGAATAAGCACCGGCTAACTCCGT
522	0	0	0	0	0	1	0	0	0	0.81	Root;Bacteria;Firmicutes;"Clostridia";Clostridiales	TGGGGAATATTGCACAATGGGGGAAACCCTGATGCGGCAACGCCGCGTGAGTGATGACGGCCTTCGGATTGTAAACCTCTGTCCTTGGTGAAGATAATGACGGTAGCCAAGGAGGAAGCTCCGGCTAACTACGT
523	0	0	0	0	0	0	1	0	0	0.99	Root;Bacteria	ACGGAGTTAGCCGGTGCTTATTCATAGGGTACCGTCAGACAAAGAAGAATCTCTGCTTTTCTTCCCCTATAAAAGAAGTTTACAATCCAGAGGACCTTAATCCTTCACGCGGCATGGCTGGATCAGACTTGCGTCCATTGTCCAATATTCCTTA
524	0	1	0	0	0	0	0	0	0	1	Root	AAAGGACGTTGACCCGGCCTATTCAGATTCCATCAGGGTGAGCGAACCGGATGGACGCGAGTACGCCGACGAACCACCAGAGCATCCGCTACCGGGTTTCGGTGAGGAGTACGGCCGTTGCGGCGACGAGATTCCACGGTTTTATTGTAGGGA
525	0	0	0	0	1	1	0	0	0	1	Root;Bacteria;Firmicutes;"Clostridia";Clostridiales;Veillonellaceae;Veillonella	TGGGGAATCTTCCGCAATGGACGAAAGTCTGACGGAGCAACGCCGCGTGAGTGATGACGGCCTTCGGGTTGTAAAGCTCTGTTAATCGGGACGAAAGGCCTTCTTGCGAATAGTTAGAAGGATTGACGGTACCGGAATAGAAAGCCACGGCTAACTACGT
526	0	0	0	0	26	0	0	2	19	0.81	Root;Bacteria;Firmicutes;"Clostridia";Clostridiales	TGGGGAATATTGGGCAATGGGCGAAAGCCTGACCCAGCAACGCCGCGTGAAGGAAGAAGGTCTTCGGATTGTAAACTTCTTTTATGAGGGACGAAGGACGTGACGGTACCTCATGAATAAGCCACGGCTAACTACGT
527	0	0	0	0	0	0	0	0	1	0.99	Root;Bacteria;Firmicutes;"Clostridia";Clostridiales;"Lachnospiraceae"	TGGGGAATATTGCACAATGGGCGAAAGCCTGATGCAGCGACGCCGCGTGAGCGAAGAAGTATCTCGGTATGTGAACTTCTATCAGCAGGGAAGATAGTGACGGTACTTGACTAAGAAGCCCCGGCTAACTACGT
528	0	0	0	0	0	1	0	0	0	0.99	Root;Bacteria;Firmicutes;"Clostridia";Clostridiales	TGGGGGATATTGCGCAATGGGGGAAACCCTGACGCAGCAACGCCGCGTGAAGGATGAAGGTTTTCGGATTGTAAAGCTCTGTCTTCAGGGACGATAATGACGGTACCTGAGGAGGAAGCCACGGCTAACTACGT
529	0	0	0	0	2	0	0	0	0	0.81	Root;Bacteria;Firmicutes;"Clostridia";Clostridiales;"Ruminococcaceae"	TGGGGGATATTGCACAATGGGGGAAACCCTGATGCAGCGACGCCGCGTGGAGGAAGAAGGTTTTCGGATTGTAAACTCCTGTCGTTAGGGACGATAATGACGGTACCTGACTAAGAAGCTCCGGCTAAAATACGT
530	0	0	0	0	0	0	0	0	3	0.88	Root;Bacteria;Bacteroidetes	TGAGGAATATTGGTCAATGGACGCGAGTCTGAACCAGCCAAGCCGCGTGAAGGATTAAGGCCCTACGGGTCGTAAACTTCTTTTGTCAGGGAACAAAAGTGGGGACGAGTCCCCATCTGCGTGTACCTGAAGAAAAAGCATCGGCTAACTCCGT
531	0	0	0	0	0	0	0	0	1	0.97	Root;Bacteria	TGAGGAATATTGGTCAATGGCCGAGAGGCTGAACCAGCCAAGCCGCGTGAAGGATTAAGGCCCTACGGGTTGTAAACCTCTTTTGTCAGGGAGCAAGGGGCATCACGTGTGATGCTGTGAGAGTACCTGAAGAAAAAGCATCGGCTAACTCCGT
532	0	0	0	0	0	0	0	0	21	0.82	Root;Bacteria;Firmicutes;"Clostridia";Clostridiales	TGGGGAATATTGCACAATGGGGGGAACCCTGATGCAGCAATGCCGCGTGGGTGAAGAAGCACTCCGGTGCGTAAAGCCCTGTCAGCAGGGAAGAAAATGACAGTACCTGGACAAGAAGCCCCGGCTAACTACGT
533	0	0	0	0	0	0	0	0	1	0.88	Root;Bacteria;Bacteroidetes;Bacteroidetes;Bacteroidales;Prevotellaceae	TGAGGAATATTGGTCAATGGGCGTAAGCCTGAACCAGCCAAGTAGCGTGAGGGATGACTGCCCTACGGGTTGTAAACCTCTTTTGTTTGGGAATAAAGTGCGGGACGTGTCCCGCATTGCATGTACCATTTGAATAAGGACCGGCTAATTCCGT
534	0	0	0	0	0	2	0	0	0	0.82	Root;Bacteria;Actinobacteria;Actinobacteria	TGGGGAATCTTGCGCAATGGGCGAAAGCCTGACGCAGCAACGCCGCGTGGGGGAAGAAGGCCTTCGGGTTGTAAACCTCTTTCAGCGGGGACGAAGCCTGTTTTGCAGGTGACGGTACCCGCAGAAGAAGCACCGGCTAACTACGT
535	0	0	0	0	0	1	0	0	0	0.93	Root;Bacteria;Firmicutes	TAGGGAATCTTCCACAATGGACGAAAGTCTGATGGAGCAACGCCGCGTGAATGAAGAAGGCCTTCGGGTCGTAAAATTCTGTTGTCAGAGAAGAACGTGCGTGAGAGTAACTGTTCATGTATTGACGGTACCTGACTAAGAAGCCCCGGCTAACTACGT
536	0	0	0	0	1	0	0	0	0	0.89	Root;Bacteria	TGAGGAATATTGGTCAATGGGCGGAAGCCTGAACCAGCCATGCCGCGTGCGGGAAGGAGGCCCTATGGGCTGTGAACCGCTTTTGCCTGGAGGCAATAAGGGCGCCGTGCGCGCCCGATGAGAGTACCAGGCGAATAAGCATCGGCTAACTCCGT
537	0	0	0	0	23	0	0	1	0	0.87	Root;Bacteria;Firmicutes;"Clostridia";Clostridiales;"Ruminococcaceae";"Ruminococcaceae Incertae Sedis"	TGGGGGATATTGGACAATGGGGGCAACCCTGATCCAGCGACGCCGCGTGAGGGAAGAAGGTTTTCGGATTGTAAACCTCTGTTGACGGAGAAAAAATGATGGTATCCGTTTAGAAAGCCACGGCTAACTACGT
538	0	0	0	0	0	0	0	0	1	0.85	Root;Bacteria;Firmicutes;"Clostridia";Clostridiales	TGGGGAATATTGCACAATGGAGGAAACTCTGACGCAGCGATGCCGCGTGAGGGAATAAGGTTTTCGGCTCCTCCAACCTCTGTCTTCAGGGACGATAATGACGGTACCTGAGGAGGAAGCTCCGGCTAACTACGT
539	0	0	0	0	1	16	0	0	0	0.84	Root;Bacteria;Bacteroidetes;Bacteroidetes;Bacteroidales;Prevotellaceae	TGAGGAATATTGGTCAATGGACGGAAGTCTGAACCAGCCAAGTAGCGTGCAGGATGACGGCCCTATGGGTTGTAAACTGCTTTTATATGGGAATAAAGTGAGCGACGTGTCGTTTTTGTAGGTACCATATGAATAAGGACCGGCTAATTCCGT
540	0	0	0	0	0	0	0	0	5	0.9	Root;Bacteria;Firmicutes;"Clostridia";Clostridiales;"Ruminococcaceae"	TGGGGGATATTGCACAATGGAGGAAACTCTGATGCAGCGATGCCGCGTGAGGGAAGAAGGTTTTCGGATTGTAAACCTCTGTGGAGCGGGACGATAATGACGGTACCGCTCAAGGAAGCCACGGCTAACTACGT
541	0	0	0	5	0	0	79	0	0	0.93	Root;Bacteria;Proteobacteria;Betaproteobacteria;Burkholderiales;Comamonadaceae;Comamonas	TGGGGAATTTTGGACAATGGGCGCAAGCCTGATCCAGCAATGCCGCGTGCAGGATGAAGGCCTTCGGGTTGTAAACTGCTTTTGTACGGAACGAAAAGCCCTGGGTTAATACCCTGGGGTCATGACGGTACCGTAAGAATAAGCACCGGCTAACTACGT
542	0	0	0	0	0	1	0	0	0	0.96	Root;Bacteria	TGGGGAATCTTGCGCAATGGAGGAAACTCTGACGCAGCTACGCCGCGTGCAGGAAGACACCCCTCAGGGGCGTAGACTGCTTTTATGCGGGAAGAAGGCATTGCGTGCGCGCAGTGTTTGACGGTACCGCAGGAATAAGCACCGGCTAACTCCGT
543	0	0	0	0	115	8	0	5	13	1	Root;Bacteria;Firmicutes;"Clostridia";Clostridiales;"Lachnospiraceae"	TGGGGGATATTGCACAATGGAGGAAACTCTGATGCAGCGACGCCGCGTGAGTGAAGAAGTATTTCGGTATGTAAAGCTCTATCAGCAGGGAAGATAATGACAGTACCTGACTAAGAAGCCCCGGCTAACTACGT
544	0	0	0	0	0	2	0	0	0	0.99	Root;Bacteria;Bacteroidetes;Bacteroidetes;Bacteroidales;Prevotellaceae	TGAGGAATATTGGTCAATGGGCGAGAGCCTGAACCAGCCAAGTAGCGTGCAGGATGACGGCCCTATGGGTTGTAAACTGCTTTTATATGGGGATAAAGTGAGCCACGTGTGGCTTATTGCAGGTACCGTATGAGTAAGGATCGGCTAATTCCGT
545	0	0	0	0	45	0	0	0	0	0.8	Root;Bacteria;Bacteroidetes;Bacteroidetes;Bacteroidales;Prevotellaceae	TGAGGAATATTGGTCAATGGGCGAGAGCCTGAACCAGCCAAGTAGCGTGAGGGATGACTGCCCTATGGGTTGTAAACCTCTTTTGTTTGGGAATAAAGTGCGCCACGTGTGGCGCATTGCATGTACCATTTGAATAAGGACCGGCTAATTCCGT
546	0	0	0	0	0	0	41	0	0	0.94	Root;Bacteria;Proteobacteria;Betaproteobacteria;Burkholderiales;Comamonadaceae;Delftia	TGGGGAATTTTGGACAATGGGCGAAAGCCTGATCCAGCAATGCCGCGTGCAGGATGAAGGCCTTCGGGTTGTAAACTGCTTTTGTACGGAACGAAAAAGCTCCTTCTAATACAGGGGGCCCATGACGGTACCGTAAGAATAAGCACCGGCTAACTACGT
547	0	0	0	0	2	0	0	1	1	0.96	Root;Bacteria;Firmicutes;"Clostridia";Clostridiales;"Lachnospiraceae"	TGGGGAATATTGCACAATGGGGGAAACCCTGATGCAGCGATGCCGCGTGAAGGAAGAAGATTTTCGGATTGTAAACTTCTATCAGCAAGGAAGAAAACGGACAGTACTTGACTAAGAAGCCCCCGGCTAACTACGT
548	0	0	0	0	3	0	0	1	0	0.83	Root;Bacteria;Firmicutes;"Clostridia";Clostridiales;"Ruminococcaceae"	TGGGGAATATTGGGCAATGGGGGCAACCCTGACCCAGCAACGCCGCGTGAAGGAAGAAGGTCTTCGGATTGTAAACTTCTTTGACGAGGGACGATAATGACGGTACCTCGAAAACAAGCCACGGCTAACTACGT
549	0	0	0	0	0	0	3	0	0	0.8	Root;Bacteria;Proteobacteria;Alphaproteobacteria	TGGGGAATTTTGGACAATGGGGGCAACCCTGATCCAGCCATGCCGCGTGCGGGAAGAAGGCCTTCGGGTTGTAAAGCTCTTTTACCCGGGATGATAATGACAGTACCGGGAGAATAAGCTCCGGCTAACTCCGT
550	0	0	0	0	37	269	0	0	1	0.95	Root;Bacteria;Bacteroidetes;Bacteroidetes;Bacteroidales;Prevotellaceae;Prevotella	TGAGGAATATTGGTCAATGGGCGAGAGCCTGAACCAGCCAAGTAGCGTGCAGGATGACGGCCCTATGGGTTGTAAACTGCTTTTATATGGGGATAAAGTGAGCTACGTGTAGCTTATTGCAGGTACCATATGAATAAGGACCGGCTAATTCCGT
551	0	0	0	0	9	701	0	57	2	0.98	Root;Bacteria;Firmicutes;"Clostridia";Clostridiales;Clostridiaceae;"Clostridiaceae 1"	TGGGGAATATTGCACAATGGGGGAAACCCTGATGCAGCAACGCCGCGTGAGTGATGACGGCCTTCGGGTTGTAAAGCTCTGTCTTCAGGGACGATAATGACGGTACCTGAGGAGGAAGCCACGGCTAACTACGT
552	0	0	0	0	1	0	0	0	0	0.97	Root;Bacteria;Firmicutes;"Clostridia";Clostridiales;"Lachnospiraceae"	TGGGGATACTGCACAATGGAGGAAACTCTGATGCAGCGACGCCGCGTGAGTGAAGAAGTATTTCGGATCGTAAAGCTCTATCAGCAGGGAAGATAATGACAGTACCTGACTAAGAAGCCCCGGCTAACTACGT
553	0	0	0	0	1	0	0	0	0	1	Root;Bacteria;Firmicutes;"Clostridia";Clostridiales;"Lachnospiraceae"	TGGGGAAGTATTGCACAATGGGGGAAACCCGTGATGCAGCAACGCCGCGTGAGTGAAGAAGTATTTCGGTATGTAAAGCTCTATCAGCAGGGAAGATAATGACAGTACCTGACTAAGAAGCTCCGGCTAAATACGT
554	0	0	0	0	1	0	0	0	0	1	Root;Bacteria;Bacteroidetes;Bacteroidetes;Bacteroidales;Porphyromonadaceae;Tannerella	TGAGGAATATTGGTCAATGGTCGAGAGACTGAACCAGCCAAGTCGCGTGAAGGATGACTGCCCTATGGGTTGTAAACTTCTTTTACAAGGGAATAAAATGAGATACGTGTATTTTATTGCATGTACCTTGGGAATAAGCATCGGCTAACTCCGT
555	0	0	0	0	0	2	0	0	0	0.87	Root;Bacteria;Bacteroidetes;Bacteroidetes;Bacteroidales	TGAGGAATATTGGTCAATGGACGGAAGTCTGAACCAGCCAAGTAGCGTGCGGGAAGAAGGCCCTATGGGTTGTAAACCGCTTTTACCCGGGAATAACGTGCTCCACGTGTTGGGGTATTGCAGGTACCGGGAGAATAAGGACCGGCTAATTCCGT
556	0	0	0	0	0	1	0	0	0	0.95	Root;Bacteria;Firmicutes	TAGGGAATCTTCGGCAATGGGCGAAAGCCTGACCGAGCAACGCCGCGTGAGTGATGACGGCCTTCGGGTTGTAAAGCTCTGTCTTCAGGGACGATAATGACGGTACCTGAGGAGGAAGCCACGGCTAACTACGT
557	0	0	0	0	0	0	0	0	1	1	Root;Bacteria	TTAGGAATATTCGTCAATGGGGGAAACCCTGAACGAGCAATGCCGCGTGAGTGATGAAGGTCTTTGGATTGTAAAACTCTGTTGTATGGAAAGAATGACTAAAATAGGAAATGATTTTAGTTTGACGGTACCATACCAGAAAGCCCCGGCTAACTACGT
558	0	0	0	0	0	0	0	0	1	0.92	Root;Bacteria;Firmicutes;"Clostridia"	TGGGGAATCTTGGGCAATGGGGGAAACCCTGACCCAGCGACGCCGCGTGAGGGAAGAAGGTCTTCGGATTGTAAACCTTTGTGACAGGGGACGAAGGAAGTGACGGTACCCTGTGAGGAAGCCCCGGCTAACTACGT
559	0	0	0	0	7	0	0	0	1	1	Root;Bacteria	TGGGGAATATTGGGCAATGGGCGAAAGCCTGACCCAGCAACGCCGCGTGAAGGAAGAAGGTTTTCGGATCGTAAACTTCTATCCTTGGTGAAGATAATGACGGTAGCCAAGAAGGAAGCCCCGGCTAACTACGT
560	0	0	0	0	0	0	0	0	1	1	Root;Bacteria	TTAGGAATATTCGTCAATGGGGGAAACCCTGAACGAGCAATGCCGCGTGAGTGATGAAGGTCTTTGGATTGTAAAACTCTGTTGTATGGAAAAAATTGCTAGGTTAGGAAATGAACTTAGTTTGATGGTACCATACCAGAAAGCCCCGGCTAACTACGT
561	1	0	0	0	7	0	0	0	6	0.8	Root;Bacteria;Firmicutes	TGGGGAATATTGCACAATGGGCGCAAGCCTGATGCAGCAACGCCGCGTGAGGGAAGACGGTTTTCGGATTGTAAACCTCTGTCTTTGGTGACGAAGAAGTGACGGTAGCCAAGGAGGAAGCCACGGCTAACTACGT
562	0	0	0	0	0	0	0	0	1	0.85	Root;Bacteria;Bacteroidetes;Bacteroidetes;Bacteroidales;Prevotellaceae	TGAGGAATATTGGTCAATGGGCGGAAGCCTGAACCAGCCAAGTAGCGTGAAGGATGACGGCCCTACGGGTTGTAAACTTCTTTTATGCGGGAACAAAGTGCGCCACGCGTGGCGTTTTGCGCGTACCGCAGGAAAAAGCACCGGCTAATTCCGT
563	0	0	0	0	0	1	0	0	0	0.86	Root;Bacteria;Actinobacteria;Actinobacteria;Actinobacteridae;Bifidobacteriales;Bifidobacteriaceae	TGGGGAATATTGCACAATGGGCGCAAGCCTGATGCAGCGACGCCGCGTGCGGGATGACGGCCTTCGGGTTGTAAACCGCTTTTGATTGGGAGCAAGCGGAAGTGAGTGTACCTTTCGAATAAGCGCCGGCTAACTACGT
564	0	0	2	0	0	0	0	0	0	0.8	Root;Bacteria;Firmicutes;"Bacilli";Bacillales;Bacillaceae;"Bacillaceae 2"	TAGGGAATCTTCCGCAATGGACGAAAGTCTGACGGAGCAACGCCGCGTGAGTGATGAAGGTCTTCGGATCGTAAAACTCTGTTGTCAGGGAAGAACAAGTTGTGTTCTAACAGGACATGACCTTGACGGTACCTGACCAGAAAGCCCCGGCTAACTACGT
565	0	0	0	0	1	0	0	0	0	0.94	Root;Bacteria;Bacteroidetes	TGAGGAATATTGGTCAATGGACGAGAGTCTGAACCAGCCAAGTAGCGTGCAGGATGACGGCCCTATGGGTTGTAAACTTCTTTTAAGTGGGAAGAGCAGAAGACGGTACCACTTGAATAAGCCACGGCTAACTACGT
566	0	0	0	0	0	4	0	0	0	1	Root;Bacteria;Actinobacteria;Actinobacteria;Coriobacteridae;Coriobacteriales;Coriobacterineae;Coriobacteriaceae;Collinsella	TGGGGAATCTTGCGCAATGGGGGGAACCCTGACGCAGCGACGCCGCGTGCGGGACGAAGGCCCTCGGGTCGTAAACCGCTTTCAGCAGGGATGAGACAAGACGGTACCTGCAGAAGAAGCCCCCGGCTAACTACGT
567	0	0	0	0	0	0	0	0	1	0.82	Root;Bacteria;Firmicutes	TGGGGAATATTGTACAATGGAGGAAACTCTGATACAGCAACGCCGCGTGAGTGATGAAGGTTTTAGGATTGTAAAGCTCTGTCTTTGGGGACGAAGAAATGACGGTACCCAAGGAGGAAGCCCCGGCTAACTACGT
568	0	0	0	0	0	0	0	1	0	0.92	Root;Bacteria;Firmicutes;"Clostridia";Clostridiales;"Lachnospiraceae"	TGGGGAATATTGCACAATGGGGGAAACCCTGATGCATCGACGCCCCGTGAAGGAAGAAGTATCTCGGTATGTAAACTTCTATCATCAGGGAAGATAGTGACGGTACCTGACTAACAAGCCCCGGCTAACTACGT
569	1	0	0	0	4	5	0	0	0	0.84	Root;Bacteria;Firmicutes;"Bacilli";Bacillales;Bacillaceae;"Bacillaceae 2";Oceanobacillus	TAGGGAATCTTCCGCAATGGACGAAAGTCTGACGGAGCAACGCCGCGTGAGTGATGAAGGTTTTCGGATCGTAAAACTCTGTTGTTAGGGAAGAACAAGTACGAGAGTAACTGCTCGTACCTTGACGGTACCTAACCAGAAAGCCACGGCTAACTACGT
570	0	0	0	0	0	0	0	0	3	0.88	Root;Bacteria;Actinobacteria;Actinobacteria	TGGGGAATCTTGCGCAATGGGGGCAACCCTGACGCAGCAACGCCGCGTGCGGGACGACGGCCTTCGGGTTGTAAACCGCTTTCAGCGGGGACGATTATGACGGTACCCGCAGAAGAAGCTCCGGCTAACTACGT
571	1	0	0	0	0	2	0	0	0	1	Root;Bacteria;Firmicutes;"Bacilli";Bacillales;Planococcaceae;Caryophanon	TAGGGAATCTTCCACAATGGACGAAAGTCTGATGGAGCAACGCCGCGTGAGTGAAGAAGGATTTCGGTTCGTAAAACTCTGTTGCAAGGGAAGAACAAGTAGCGTAGTAACTGGCGCTACCTTGACGGTACCTTGTTAGAAAGCCACGGCTAACTACGT
572	1	0	0	0	0	0	0	0	0	0.96	Root;Bacteria;Proteobacteria;Betaproteobacteria;Burkholderiales;Oxalobacteraceae	TGGGGAATTTTGGACAATGGGCGCAAGCCTGATCCAGCAATGCCGCGTGAGTGAAGAAGGCCTTCGGGTTGTAAAGCTCTTTTGTCAGGGAAGGAACGGTAGAGGCTAATATCCTTTGCTAATGACGGTACCTGAAGAATAAGCACCGGCTAACTACGT
573	0	0	0	0	0	3	0	0	0	1	Root;Bacteria	TGAGGAATATTCCACAATGAGTGAAAGCTTGATGGAGCAATGCCGCGTGCAGGATGAAGGCCCTCGGGTTGTAAACTGCTTTTATTAGAGAAGATTATGACGGTAACTAATGAATAAGGGACGGCTAACTACGT
574	2	0	0	0	0	0	0	0	0	0.96	Root;Bacteria;Actinobacteria;Actinobacteria;Actinobacteridae;Actinomycetales;Corynebacterineae;Mycobacteriaceae;Mycobacterium	TGGGGAATATTGCACAATGGGCGAAAGCCTGATGCAGCGACGCCGCGTGGGGGATGACGGCCTTCGGGTTGTAAACCTCTTTCACCATCGACGAAGGTCCGGGTTTTCTCGGGCTGACGGTAGGTGGAGAAGAAGCACCGGCCAACTACGT
575	0	0	0	0	4	0	0	0	0	0.96	Root;Bacteria;Proteobacteria;Epsilonproteobacteria;Campylobacterales;Campylobacteraceae;Campylobacter	TAGGGAATATTGCGCAATGGGCGAAAGCCTGACGCAGCAACGCCGCGTGGAGGATGACACTTTTCGGAGCGTAAACTCCTTTTCTTTGGGAAGAATTTTGACGGTACCAAAGGAATAAGCACCGGCTAACTCCGT
576	0	0	0	0	6	0	0	0	0	0.94	Root;Bacteria;Bacteroidetes;Bacteroidetes;Bacteroidales	TGAGGAATATTGGTCAATGGGCGCAAGCCTGAACCAGCCAAGTAGCGTGAAGGATGACTGCCCTATGGGTTGTAAACTTCTTTTATGCGGGAATAAACTCGACCATGTATGGTCGTTTGCATGTACCGCAAGAAAAAGCATCGGCTAATTCCGT
577	0	0	0	0	1	0	0	0	0	0.8	Root;Bacteria;Actinobacteria;Actinobacteria;Coriobacteridae;Coriobacteriales;Coriobacterineae;Coriobacteriaceae	TGGGGAATATTGCGCAATGGGCGGAAGCCTGACGCAGCGACGCCGCGTGCGGGACGGAGGCTCCCGGGCCGTAAACCGCTTTCAGCGGGGACGATTGTGACTGTACCCGCAGAAGAAGCCCCGGCTAACTATGT
578	0	0	0	0	0	0	3	0	0	0.95	Root;Bacteria	TGGGGAATATTGGACAATGGGCTCACGCCCGATCCAGCAATATCGCGTGGGTGAAGAAGGGCACTGTCGCTTGTCAAGCTCTTTCGTCGAGTTTCGATCATGACAGGACTCGAGGAAGAAGCCCCGGCTAACTCCGT
579	0	0	0	0	0	0	0	0	1	1	Root;Bacteria	TTAGGAATATTCGTCAATGGGGGAAACCCTGAACGAGCAATGCCGCGTGAGTGATGAAGGCCCTATGGGTTGTAAAACTCTGTTGTTTGGAAAGAATTGTACAAGTAGGAAATGACTTGTGCTTGACGGTACCATTCAAGAAAGCCACGGCTAACTACGT
580	0	0	0	0	0	0	0	0	2	0.97	Root;Bacteria	TGGGGAATCTTCCGCAATGGGCGAAAGCCTGACGGAGCAATGCCACGTGAGTGATGAAGGAATTCGTTCCGTAAAGCTCTTTTGTTTATGACGAATGTGCAGGTCGTGAATAATGACTTGTAATGACGGTAGTAAACGAATAAGCCACGGCTAACTACGT
581	0	0	0	0	0	0	1	0	0	0.83	Root;Bacteria;Proteobacteria;Gammaproteobacteria	TGGGGAATATTGGACAATGGGCGAAAGCCTGATCCAGCCATGCCGCGTGTGTGAAGAAGGTCTTCGGATTGTAAAGCACTTTAAGTTGGGAGGAAACAATGACGGTATCTGGGGAATAAGCATCGGCTAACTCTGT
582	0	0	0	0	2	4	0	0	0	0.82	Root;Bacteria;Actinobacteria;Actinobacteria;Coriobacteridae;Coriobacteriales;Coriobacterineae;Coriobacteriaceae;Olsenella	TGGGGAATCTTGCGCAATGGGCGGAAGCCTGACGCAGCGACGCCGCGTGCGGGAGGAAGGCCCTCGGGTCGTAAACCGCTTTCAGCAGGGGACGAGGCCGCGAGGTGACGGTACCTGCAGAAGAAGCCCCGGCTAACTACGT
583	0	0	0	0	0	1	0	0	0	0.86	Root;Bacteria;Firmicutes;"Clostridia";Clostridiales;"Lachnospiraceae"	TGGGGAATATTGCACAATGGGCGAAAGCCTGATGCAGCAACGCCGCGTGAGCGAAGAAGTATTTCGGTATGTAAAGCTCTATCAGCAGGGAAGATAATGACGGTACTTGAGGAGGAAGCCCCGGCTAACTACGT
584	0	0	0	0	0	0	7	0	0	1	Root;Bacteria;Proteobacteria;Betaproteobacteria;Burkholderiales;Comamonadaceae	TGGGGAATTTTGGACAATGGGCGCAAGCCTGATCCAGCAATGCCGCGTGCAGGACGAAGGCCTTCGGGTTGTAAACTGCTTTTGTACGGAGCGAAACGGTCTGGGTTAATACCCTGGGCTAATGACGGTACCGTAAGAATAAGCACCGGCTAACTACGT
585	0	0	0	0	0	0	1	0	0	0.97	Root;Bacteria;Proteobacteria;Betaproteobacteria;Burkholderiales;Comamonadaceae	TGGGGAATTTTGGACAATGGGCGAAAGCCTGATCCAGCCATTCCGCGTGCAGGATGAAGGCCCTCGGGTTGTAAACTGCTTTTGTACAGAACGAAAAGGTTTCTACTAATACTAGGAGCTCATGACGGTACTGTAAGAATAAGCACCGGCTAACTACGT
586	0	0	0	0	0	0	0	0	1	0.95	Root;Bacteria;Bacteroidetes;Bacteroidetes;Bacteroidales	TGAGGAATATTGGTCAATGGCCGGGAGGCTGAACCAGCCAAGTCGCGTGGAGGATGAAGGTTCTATGGATTGTAAACTTCTTTTGTGCGGGAATAAAGTCGGGGACGCGTCCCCGTTTGCATGTACCGCACGAATAAGCATCGGCTAACTCCGT
587	0	0	0	0	4	9	0	0	0	1	Root;Bacteria;Firmicutes;"Bacilli";Bacillales;Planococcaceae	TAGGGAATCTTCCGCAATGGACGCAAGTCTGACGGAGCAACGCCGCGTGAGTGACGAAGGTTTTCGGATCGTAAAACTCTGTTGTGAGGGAAGAACACGTACCAGGTAACTACTGGTACCTTGACGGTACCTCACCAGAAAGCCACGGCTAACTACGT
588	0	0	1	0	0	0	15	1	0	1	Root;Bacteria;Proteobacteria;Gammaproteobacteria;Xanthomonadales;Xanthomonadaceae	TGGGGAATATTGGACAATGGGCGCAAGCCTGATCCAGCCATACCGCGTGGGTGAAGAAGGCCTTCGGGTTGTAAAGCCCTTTTGTTGGGAAAGAAATCCAGCTGGCTAATACCCGGTTGGGATGACGGTACCCCAAAGAATAAGCACCGGCTAACTTCGT
589	0	0	0	0	1	0	1	0	0	1	Root	GCGCGCAAATTACACAATCCCGACACGGGGAGGTAGTGACAATAAATACTGATACAGGGCTCTTTTGGGTCTTGTAATTGGAATGAGTACAATTTAAATCACTTAACGAGGAACAATTGGAGGGCAAGTCTGGT
590	0	0	0	0	0	4	0	0	0	0.84	Root;Bacteria;Bacteroidetes	TGAGGAATATTGGTCAATGGGCGGAAGCCTGAACCAGCCATGCCGCGTGAAGGACTAAGGCCCTATGGGTCGTAAACTTCTTTAGACGCAGAGCAATAAGGGCCTCGTGAGGTCCGATGAGAGTATGCGTAGAATAAGCATCGGCTAACTCCGT
591	0	0	0	0	0	0	0	0	2	1	Root;Bacteria	TGGGGAATATTGCGCAATGGGGGAAACCCTGACGCAGCAACGCCGCGTGATTGAAGAAGGTCTTCGGATTGTAAAAATCTTTTATCAGAGACGAAGAAGTGACGGTATCTGATGAATAAGCTCCGGCTAACTACGT
592	0	0	0	0	0	0	64	0	0	0.8	Root;Bacteria;Proteobacteria;Betaproteobacteria;Burkholderiales;Incertae sedis 5;Pelomonas	TGGGGAATTTTGGACAATGGGCGCAAGCCTGATCCAGCCATGCCGCGTGCGGGAAGAAGGCCTTCGGGTTGTAAACCGCTTTTGTCAGGGGAAGAAAAGGTTCTGGCTAATACCTGGGACTCATGACGGTACCTGAAGAATAAGCACCGGCTAACTACGT
593	0	0	0	0	0	0	14	0	0	0.97	Root;Bacteria;Proteobacteria;Alphaproteobacteria;Rhodospirillales;Acetobacteraceae;Craurococcus	TGGGGAATATTGGGCAATGGGCGCAAGCCTGACCCAGCAATGCCGCGTGGGTGAAGAAGGTCTTCGGATTGTAAAGCCCTTTCGGCGGGGGACGATGGTGACGGTACCCGCAGAAGAAGCCCCGGCCAACTTCGT
594	0	0	0	0	0	0	137	0	0	1	Root;Bacteria	TGGGGAATCTTGGTCAATGGGCGCAAGCCTGAACCAGCGATGCCGCGTGAGTGATGAAGGCCTTCGGGTTGTAAAGCTCTGTGGGGCGGGACGAAAAGACAGGTTCTAACAGGACCTGAAATTGACGGTACCGCCTTAGCAAGCACCGGCTAACTCTGT
595	0	0	0	0	0	1	0	0	0	0.8	Root;Bacteria;Actinobacteria;Actinobacteria;Actinobacteridae	TGGGGAATATCGCACAATGGGCGTAAGCCTGATGCAGCGACGCCGCGTGCGGGATGACGGCCTTCGGGTTGTAAACCGCTTTTGGCGGGGAGCAAGGCGCTTCTGGCGTTGAGTGTACCCGTCGAATAAGCACCGGCTAACTACGT
596	0	0	0	0	0	0	6	0	0	0.96	Root;Bacteria;Proteobacteria;Gammaproteobacteria;Legionellales;Legionellaceae	TGGGGAATATTGGACAATGGGGGAAACCCTGATCCAGCAATGCCGCGTGTGTGAAGAAGGCCTGAGGGTTGTAAAGCACTTTCAGTGGGGAGGAGGATTTGAAGGTTAAGAGCCATTAAATTGGACGTTACCCACAGAAGAAGCACCGGCTAACTCCGT
597	0	0	0	0	0	0	0	1	0	1	Root;Bacteria	TGGGGAATATTGCACAATGGGGGAAACCCTGATGCAGCAACGCCGCGTGAAGGATGAAGGCCCTTGGGTCGTAAACTTCTGTTCTAGGGGAAGATAGTGACGGTACCTTAGGAGCAAGTCCCGGCTAACTACGT
598	0	0	0	0	0	2	0	0	0	0.8	Root;Bacteria;Firmicutes	TGGGGAATCTTCCGCAATGGGCGAAAGCCTGACGGAGCAACGCCGCGTGAGTGATGACGGCCTTCGGGTTGTAAAGCTCTTTTGTCCGGGACGAACGGCACGGGTAGGAAATGACCTGTGAGTGACGGTGCCGGAAGAAAAAGCCACGGCTAACTACGT
599	0	0	0	1	0	0	24	0	0	0.99	Root;Bacteria;Proteobacteria;Gammaproteobacteria;Pseudomonadales;Moraxellaceae;Acinetobacter	TGGGGAATATTGGACAATGGGCGAAAGCCTGATCCAGCCATGCCGCGTGTGTGAAGAAGGCCTTTTGGTTGTAAAGCACTTTAAGCGAGGAGGAGGCTACTTGGATTAATACTCTAGGATAGTGGACGTTACTCGCAGAATAAGCACCGGCTAACTCTGT
600	0	0	0	0	0	0	3	1	0	1	Root;Bacteria;Bacteroidetes;Bacteroidetes;Bacteroidales;Porphyromonadaceae;Parabacteroides	TGAGGAATATTGGTCAATGGGCGCGAGCCTGAACCAGCCAAGTCGCGTGAGGGATGAAGGTTCTATGGATCGTAAACCTCTTTTATAAGGGAATAAAGTGCGGGACGTGTCCCGTTTTGTATGTACCTTATGAATAAGGATCGGCTAACTCCGT
601	0	0	0	0	0	1	0	0	0	0.92	Root;Bacteria;Firmicutes	TGGGGAATATTGCACAATGGGCGAAAGCCTGATGCAGCAACGCCGCGTGAGCGATGAAGGCCTTCGGATCGTAAAGCTCTGTTGTAAGAGAAAAACGGCACTCATAGGGAATGATGAGTGAGTGATGGTATCTTACCAGAAAGTCACGGCTAACTACGT
602	0	0	2	0	0	0	0	0	0	0.82	Root;Bacteria;Firmicutes;"Bacilli";Bacillales	TAGGGAATCTTCCGCAATGGACGCAAGTCTGACGGAGCAACACCGCGTGAGTGATGAAGGTCTTCGGATCGTAAAACTCTGTTATTAGGGAAGAACAAGTATCAACCGAATAAGTTGGTACCTTGACGGTACTTAATCAGAAAGCCCCGGCTAACTACGT
603	0	0	0	0	1	0	0	0	0	0.99	Root;Bacteria	TGGGGAATATTGCACAATGGGCGAAAGCCTGATGCAGCAACGCCGCGTGAGGGAAGAAGGTTTTCGGATCGTAAACCTCTGTTGCAGGGGACGAGGAGTAGACGGTACCCTGCGAGGAAGCTCCGGCTAACTACGT
604	0	0	0	0	1	0	0	0	0	1	Root;Bacteria	TGGGGAATATTGGGCAATGGGCGAAAGCCTGACCCAGCAACGCCGCGTGAAGGAAGAAGGCCTTCGGGTTGTAAAACCTCTGTCCTTGGGGAAGAAGAAAAGTGACGGTACCCAAGGAGGAAGCCCCGGCTAACTACGT
605	0	0	0	0	1	0	0	0	0	1	Root;Bacteria	ACGTAGTTAGCCGGAGCTTATTCTACAGGTACTGTCTTTTTCTTCCCTGTCTAAAGCAGTTTACAATCCGAAAACCTTCTTCCTGCACGCGGCGTCACTGCGTCAGAGTTTCCTCCATTGCGCAATATTCCCGA
606	0	0	0	0	0	1	0	0	0	0.98	Root;Bacteria;Firmicutes;"Bacilli";"Lactobacillales"	TAGGGAATCTTCGGCAATGGACGAAAGTCTGACCGAGCAACGCCGCGTGAGTGAAGAAGGTTTTCGGATCGTAAAACTCTGTTGTTAGAGAAGAACAAGGATGAGAGTAACTGGCTCATGTTTGACGGTAATCAACCAGAAAGTCACGGCTAACTACGT
607	0	0	0	0	0	1	0	0	0	1	Root;Bacteria	TGGGGAATATTGCACAATGGGCGCAAGCCTGATGCAGCGACGCCGCGTGAGGGATGGAGGCCTTCGGGTTGTAAACCTCTTTTATCAGGGACGATAATGACGGTACCTGAGGAGGAAGCCACGGCTAACTACGT
608	0	0	0	0	0	0	0	0	15	0.81	Root;Bacteria;Firmicutes;"Clostridia";Clostridiales	TGGGGAATATTGGGCAATGGGCGAAAGCCTGACCCAGCAACGCCGCGTGAAGGATGACGGTCTTCGGATTGTAAACTTCTTTAATTGGGGAAGAACAAATGACCTACCCAAAGAATAAGTCACGGCTAACTACGT
609	0	0	2	0	0	0	0	0	0	0.84	Root;Bacteria;Firmicutes;"Clostridia";Clostridiales;Clostridiaceae;"Clostridiaceae 1";Clostridium	TGGGGAATATTGCGCAATGGGGGAAACCCTGACGCAGCAACGCCGCGTGAGTGATGACGGTCTTCGGATTGTAAAGCTCTGTTTTCAGGGACGATAATGACGGTACCTGAGGAGGAAGCCACGGCTAACTACGT
610	0	0	0	1	0	0	0	0	0	0.91	Root;Bacteria;Firmicutes;"Bacilli";Bacillales;Bacillaceae	TAGGGAATCTTCCGCAGTGGACGAAAGTCTGACGGAGCGACGCCGCGTGAGTGATGAAGGTCTTCGGATCGTAAAACTCTGTTGTTAGGGAAGAACAAGTATCGGCCGAATACGCCGGTACCTTGACGGTACCTAACCAGAAAGCCCCGGCTAACTACGT
611	0	0	0	0	0	1	0	0	0	0.87	Root;Bacteria;Firmicutes;"Bacilli";Bacillales	TAGGGAATCTTCCGCAATGGACGCAAGTCTGACGGAGCAACGCCGCGTGAGTGATGAAGGTTTTCGGATCGTAAAACTCTGTTGCGAGGGAAGAAACCGTGCCAGCTAACTACTGGCACCTTGACGGTACCTCGCCAGAAAGCCACGGCTAACTACGT
612	0	0	0	0	0	0	0	0	1	1	Root;Bacteria	TGGGGAATATTGGGCAATGGGCGAAAGCCTTACCCAGCAATGCCGCGTGAGTGATGAAGGTCTTATGGATTGTAAAACTCTTTGATTAGGGACGAATAAATGACGGTACCTAAAGAACAAGCCCCGGCTAACTATGT
613	0	0	0	0	2	0	0	0	0	1	Root;Bacteria;Firmicutes;"Clostridia";Clostridiales;"Lachnospiraceae"	TGGGGAATATTGCACAATGGGGGAAACCCTGATGCAGCGACGCCGCGTGAAGGAAGAAGTATCTCAATATGTAAACTTCTATCAGCAAGGAAGATAGTGACGGTACCTGACTAAGAAGCCCCGGCTAACTACGT
614	0	0	0	5	0	0	0	0	0	0.84	Root;Bacteria;Firmicutes;"Clostridia"	TAGGGAATCTTCCGCAATGGGCGCAAGCCTGACGGAGCAACGCCGCGTGAATGATGAAGGCCTTCGGGTCGTAAAATTCTGTCTTCTGTGAAGAACAAGTGTGAGAGTGGAATGCTCACACCCTGACGGTAACAGAGGAGGAAGCCCCGGCTAACTACGT
615	0	0	0	0	0	1	0	0	0	0.97	Root;Bacteria	TGGGGAATATTGCACAATGGGCGAAAGCCTGATGCAGCGACGTCGCGTGGAGGAAGAAGGCCTTCGGGCTGTAAACTCCTTTTCCAAGGGGAAGAGTAAGGACGGTACCTTGGGAATAAGCTCCGGCTAACTACGT
616	0	0	0	0	0	0	1	0	0	1	Root;Bacteria	TAGGGAATATTGCGCAATGGACGAAAGTCTGATCCAGCCATGCCGCGTGAAGGATTAAGGTCCTCTGGATTGTAAACTTCTTTTATAGGGGAGAAAGCAGAGATTCTTCTTTGTCTGACGGTACCCTATGAATAAGCACCGGCTAACTCCGT
617	0	0	0	0	0	0	0	0	1	0.9	Root;Bacteria;Firmicutes;"Bacilli";"Lactobacillales"	TAGGGAATTTTCCACAATGGGCGCAAGCGTGATGGAGCAACACCGCGTGAGTGAAGAAGGGTTTCGGCTCGTAAAGCTCTGTTGTTAAAGAAGAACATGCGTGAGAGTAACCGTTCACGCATTGACGGTATCTAACCAGAAAGTCTCGGCTAACTACGT
618	0	0	0	0	0	0	0	0	1	0.98	Root;Bacteria	TGAGGAATATTGGACAATGGCCGGAAGGCTGATCCAGCCATGCCGCGTGAAGGATAAGGTCCTATGGATTGTAAACTTCTTTTGAGTGGGAGCAATAAGGGTGTCGTGACATCCGATGAGAGTACCATTCGAATAAGCATCGGCTAACTCCGT
619	0	0	0	0	0	1	0	0	0	1	Root;Bacteria	CAAGGAATTTTCCGCAATGGGCGCAAGCCTGACGGAGCAACGCCGCGTGCGGGAGGACGCCTTTCGGGGTGTAAACCGCTGTTCGTGGGGACGAAGCACTGACGGTACCCACGGAGGAAGCCCGGCTAACTACGT
620	0	0	0	0	6	0	0	0	0	1	Root;Bacteria	TGGGGAATATTGGGCAATGGAGGGAACTCTGACCCAGCAATGCCGCGTGAGCGAAGAAGGTTTTCGGATTGTAAAGCTCTTTAAGCAGGGGACGAAGAAAGTGACGGTACCTGCAGAATAAGCATCGGCTAACTACGT
621	0	0	0	0	5	0	0	0	0	0.9	Root;Bacteria;Bacteroidetes;Bacteroidetes;Bacteroidales;Prevotellaceae	TGAGGAATATTGGTCAATGGACGAAAGTCTGAACCAGCCAAGTAGCGTGCAGGACGACGGCCCTATGGGTTGTAAACTGCTTTTATGTGGGAATAAAGTGAGGGACGTGTTCCTTTTTGTAGGTATTACATGAATAAGGACCGGCTAATTCCGT
622	0	0	0	0	0	0	0	0	1	0.86	Root;Bacteria;Bacteroidetes;Bacteroidetes;Bacteroidales;Prevotellaceae	TGAGGAATATTGGTCAATGGGCGAGAGCCTGAACCAGCCAAGTAGCGTGCGGGATGAAGGCCCTATGGGTTGTAAACCGCTTTTGCAGGGGGGTAAAGTGCGCCACGTGTGGTGTATTGCAAGTACCCTGCGAATAAGGACCGGCTAATTCCGT
623	0	0	0	0	0	0	3	0	0	0.9	Root;Bacteria;Proteobacteria;Betaproteobacteria;Burkholderiales	TGGGGAATATTGCACAATGGGCGCAAGCCTGATGCAGCCATGCCGCGTGCGGGAAGAAGGCCTTCGGGTTGTAAACCGCTTTTGTCAGGGAAGAAATCCTTTGGGCTAATAACTCGGAGGGATGACGGTACCTGAAGAATAAGCACCGGCTAACTACGT
624	0	0	0	0	1	0	0	0	0	0.92	Root;Bacteria;Bacteroidetes;Bacteroidetes;Bacteroidales;Prevotellaceae	TGGGGGATATTGCACAATGGACGAGAGTCTGAACCAGCCAAGTAGCGTGCAGGATGACGGCCCTATGGGTTGTAAACTGCTTTTATAAGGGATAAAGTGAGCCTCGTGAGGCTTTTTGCATGTACCTTATGAATAAGGACCGGCTAATTCCGT
625	0	0	0	0	1	0	0	0	1	1	Root;Bacteria	TTAGGAATATTCGTCAATGGGGGAAACCCTGAACGAGCAATGCCGCGTGAGTGATGAAGGTCTTTGGATTGTAAAACTCTGTTGTATGGGAAGAACGTTGGTATTAGGAAATGAATGCCAAGTGACGGTACCATACTAGAAAGCCCCGGCTAACTACGT
626	0	0	0	0	0	0	0	1	0	0.96	Root;Bacteria;Firmicutes;"Clostridia";Clostridiales;"Ruminococcaceae"	TGGGGGATATTGCACAATGGGGGAAACCCTGATGCAGCGACGCCGCGTGAGGGAAGAAGGTCTTCGGATTGTAAACCTCTGTCTTCGGGGACGAACACAATGACGGTACTCGAGGAGGAAGCCACGGCTAACTACGT
627	0	0	0	0	0	0	1	0	0	0.86	Root;Bacteria	GCGACCCGCCTCGCGGCGGTTGGCGAAATGCGCTGCGATCATCGCATGCTTTCCCGGAGAAAGCGGATGAACCATGCACTCGAGAGATCGACGACCTTGTCCAGTGTCCCCGGTTCTTCGAAGAGATGGCCCGCACCGGGCACAACA
628	0	0	0	0	0	0	0	1	1	0.99	Root;Bacteria	TGGGGAATATTGCACAATGGGGGAAACCCTGATGCAGCGACGCCGCGTGGAGGAAGAAGGTCTTCGGATTGTAAACTCCTGTCCCAGGGGACGATAATGACGGTACCCTGGGAGGAAGCACCGGCTAACTACGT
629	0	0	0	0	13	0	0	2	1	1	Root;Bacteria;Firmicutes;"Clostridia";Clostridiales;"Ruminococcaceae";Ruminococcus	TGGGGAATATTGCACAATGGGGGAAACCCTGATGCAGCGATGCCGCGTGGAGGAAGAAGGTTTTCGGATTGTAAACTCCTGTTGAAGAGGACGATAATGACGGTACTCTTTTAGAAAGCTCCGGCTAACTACGT
630	0	0	0	0	0	0	1	0	0	0.8	Root;Bacteria;Actinobacteria;Actinobacteria	TGGGGAATCTTGCACAATGGGCGAAAGCCTGATGCAGCGACGCCGCGTGGGGGACGAATGCCTTCGAGTTGTAAACCCCTTTCGGCAGGGAAGAAGCGCAAGTGACGGTACCTGCAGAAGAAGTCCCGGCTAACTACGT
631	0	0	0	0	0	1	0	0	0	0.83	Root;Bacteria;Proteobacteria;Gammaproteobacteria;Chromatiales;Ectothiorhodospiraceae	TGGGGAATATTGGACAATGGGCGCAAGCCTGATCCAGCAATGCCGCGTGTGTGAAGAAGGCCTGCGGGTTGTAAAGCACTTTCAGTAGGGAAGAAAAGCTTGTGGTTAATACCCGCGAGTCTTGACGTAACCTACAGAAGAAGCACCGGCTAACTCCGT
632	0	0	0	0	0	0	1	0	0	0.99	Root;Bacteria;Proteobacteria;Gammaproteobacteria	ACGGAGTTAGCCGGTGCTTCTTCTGCGAGTAACGTCACAGATATTACCTATTAAGCAATACCCTTTCCTCCTCGCTGAAAGTGCTTTACAACCCGAAAGCCTTCTTCACACACGCGGCATGGCTGCATCAGGCTTGCGCCCATTGTGCAATATTCCCCA
633	0	0	0	0	2	1	0	0	0	1	Root;Bacteria	TGGGGAATATTGGGCAATGGGGGAAACCCTGACCCAGCAACGCCGCGTGAGGGAAGAAGGTTTTCGGATTGTAAACCTCTGTCCTAAGAGAAGAGGGGAAGACGGTATCTTAGGAGGAAGCCCCGGCTAACTACGT
634	0	0	0	0	0	0	0	2	0	0.82	Root;Bacteria;Firmicutes;"Clostridia";Clostridiales	TGGGGGATATTGCACAATGGGGGAAACCCTGATGCAGCAACGCCGCGTGAAGGAAGAAGGTCTTCGGATTGTAAACTTCTGTCCTCAGGGAAGATAATGACGGTACCTGAGGAGGAAGCTCCGGCTAACTACGT
635	0	0	0	0	0	1	0	0	0	0.94	Root;Bacteria;Firmicutes;"Clostridia";Clostridiales;"Lachnospiraceae"	TGGGGAAGTATTGCACAATGGGGGAAACCCGTGATGCAGCGACGCCGCGTGAGTGAAGAAGTAATTCGTTATGTAAAGCTCTATCAGCAGAGAAGAAAAATGACGGTACCTGACTAAGAAGCCCCGGCTAACTACGT
636	0	0	0	0	0	0	0	1	0	0.98	Root;Bacteria;Firmicutes;"Clostridia";Clostridiales	TGGGGGATATTGCACAATGGGGGAAACCCTGATGCAGCGACGCCGCGTGAGCGATGAAGGCCTTCGGGTCGTAAAGCTCTGTCCTCGGGGACGATAATGACGGTACCCGAGGAGGAAGCCACGGCTAACTACGT
637	0	0	0	0	0	0	0	1	0	1	Root;Bacteria	TGGGGAATATTGGGCAATGGGCGAAAGCCTTACCCAGCAACGCCGCGTGAGGGAAGAAGGTTTTCGGATTGTAAACCTCTGTCCTGGGGGACGAAGGAAGTGACGGTACCCCGGGAGGAAGCCCCGGCTAACTACGT
638	0	0	0	0	0	0	0	2	0	1	Root;Bacteria	TGGGGAATATTGGGCAATGGGCGAAAGCCTGACCCAGCAACGCCGCGTGAGGGAGGAAGGTTTTCGGATTGTAAACCTCTGTCCTTGGGGAAGAAGTAAGTGACGGTACCCAAGGCGGAAGCCCCGGCTAACTACGT
639	0	0	0	0	0	0	0	3	0	1	Root;Bacteria;Firmicutes;"Erysipelotrichi";"Erysipelotrichales";Erysipelotrichaceae;Erysipelotrichaceae Incertae Sedis	TAGGGAATTTTCGGCAATGGGGGGAACCCTGACCGAGCAACGCCGCGTGAAGGAAGAAGGAATTCGTTCTGTAAACTTCTGTTATAAAGGAAGAACGGCGGATATAGGGAATGATATCCGAGTGACGGTACTTTATGAGAAAGCCACGGCTAACTACGT
640	0	0	0	0	2	0	0	0	0	0.86	Root;Bacteria;Bacteroidetes;Bacteroidetes;Bacteroidales;Porphyromonadaceae	TGAGGAATATTGGTCAATGGGCGAGAGCCTGAACCAGCCAAGTCGCGTGAAGGATGAAGGTTCTATGGATTGTAAACTTCTTTTATTCGAGGGTAAAGTGTGTCACGTGTGGCATATTGCAAGTATCGAATGAATAAGCATCGGCTAACTCCGT
641	0	0	0	0	0	0	4	0	0	0.92	Root;Bacteria;Actinobacteria;Actinobacteria;Actinobacteridae;Actinomycetales	TGGGGAATCTTGCGCAATGGGCGAAAGCCTGACGCAGCAACGCCGCGTGGGGGATGACGGCCTTCGGGTTGTAAACCTCTTTCGACAGGGGACGAAGCTTTCGGGTGACGGTACCTGTAGAAGAAGCACCGGCTAACTACGT
642	0	0	0	0	0	0	41	0	0	0.98	Root;Bacteria;Proteobacteria;Alphaproteobacteria;Caulobacterales;Caulobacteraceae	TTAGGAATCTTGCGCAATGGGCGAAAGCCTGACGCAGCCATGCCGCGTGAATGATGAAGGTCTTAGGATTGTAAAATTCTTTCAGCGGGGACGATAATGACGGTACCCGCAGAAGAAGCTCCGGCTAACTTCGT
643	0	0	0	0	0	0	4	0	0	0.98	Root;Bacteria;Actinobacteria;Actinobacteria;Actinobacteridae;Actinomycetales;Corynebacterineae;Corynebacteriaceae;Corynebacterium	TGGGGAATATTGCACAATGAGCGCAAGCCTGATGCAGCGACGCCGCGTGGGGGATGACGGCCTTCGGGTTGTAAACTCCTTTCGCTAGGGACGAAGCTTTTTGTGACGGTACCTAGATAAGAAGCACCGGCTAACTACGT
644	0	0	0	0	7	0	0	0	66	0.89	Root;Bacteria	TGAGGAATATTGGTCAATGGGCGGAAGCCTGAACCAGCCATGCCGCGTGCGGGAAGGAGGCCCTATGGGCTGTGAACCGCTTTTGCCTGGGGGCAATAAGGGCGTCGCGCACGTCCGATGAGAGTACCAGGCGAATAAGCATCGGCTAACTCCGT
645	0	0	0	0	0	0	0	0	1	0.99	Root;Bacteria	TGGGGAATCTTCCGCAATGGGCGAAAGCCTGACGGAGCAACGCCGCGTGATCGAATGAAGGCCTTCGGGTTGTAAAGATCTGTTGACAGGGACGAATAAGCAATGCGAATAGTTTTGTGTATGACGGTACCTGTTTAGAAAGCTCCGGCTAACTACGT
646	0	0	0	0	3	2	0	0	0	0.88	Root;Bacteria;Actinobacteria;Actinobacteria;Actinobacteridae;Actinomycetales;Micrococcineae	TGGGGAATATTGCACAATGGGCGCAAGCCTGATGCAGCGACGCCGCGTGAGAGATGACGGCCTTCGGGTTGTAAACCTCTTTCAGTAGGGAAGAAGCGAAAGTGACGGTACCTGCAGAAGAAGCACCGGCTAACTACGT
647	0	0	0	0	0	0	0	0	15	0.89	Root;Bacteria;Bacteroidetes	TAGGGAATATTGGGCAATGGAAGGAATTCTGACCCAGCCATGCCGCGTGAAGGAAGACGGTCCTATGGATTGTAAACTTCTTTTATCGCAGAGTAAATTGGGGCACGTGTGCCCCATTGAGAGTATGCGATGAATAAGTATCGGCTAACTCCGT
648	0	0	0	0	2	0	0	0	1	1	Root;Bacteria	TGGGGAATATTGCACAATGGGGGAAACCCTGATGCAGCAACGCCGCGTGAACGAAGAAGGCTCTTGGGTCGTAAAGTTCTGTTCTGAGGGGAAGAAGAAAGTGACGGTACCTCAGGAGAAAGCCCCGGCTAACTACGT
649	0	0	0	0	1	0	0	0	0	1	Root;Bacteria	TGGGGAATATTAGGCAATGGGCGAAAGCCTGACCCAGCGACGCCGCGTGCAGGAAGAAGATCTTCGGATTGTAAACTGCTTTTATAGGGGACGAAACATGACGGTACCCTATGAATAAGCCACGGCTAACTACGT
650	0	0	0	0	0	0	0	0	19	0.93	Root;Bacteria;Bacteroidetes	TAGGGAATATTGGGCAATGGAGGCAACTCTGACCCAGCCATGCCGCGTGAAGGAAGACGGCCCTATGGGTTGTAAACTTCTTTTATCGTGGAGTAAACCCGGTCACGTGTGGCCGGTTGAGAGTACACGAGGAATAAGTATCGGCTAACTCCGT
651	0	0	0	0	0	1	0	0	0	1	Root;Bacteria;Firmicutes;"Bacilli";Bacillales;Bacillaceae	TAGGGAATCTTCCGCAATGGACGAAAGTCTGACGGAGCAACGCCGCGTGAGCGAAGAAGGTCTTCGGATCGTAAAGCTCTGTTGTTAGGGGAAGAACAAGTACCGTTCAAATAGGGCGGTACCTTGACGGTACCTATCGAGGAAGCCCCGGCTAACTACGT
652	0	0	0	0	0	0	1	0	0	1	Root;Bacteria;Proteobacteria;Alphaproteobacteria	TGGGGAATCTTAGACAATGGGGGCAACCCTGATCTAGCCATGCCGCGTGAGTGATGAAGGCCTTAGGGTTGTAAAGCTCTTTTACCCGGGGATGATAATGACAGTACCGGGAGAATAAGCTCCGACTAACTCCGT
653	0	0	0	0	0	0	0	0	2	0.91	Root;Bacteria;Bacteroidetes	TGAGGAATATTGGTCAATGGGCGAAAGCCTGAACCAGCCATGCCGCGTGAAGGAATAAGGCCCTATGGGTCGTAAACTTCTTTTGACGGGGAGCAATAAGGTCTACGTGTAGGCCGATGAGAGTACTCGTCGAATAAGCATCGGCTAACTCCGT
654	0	0	0	0	0	1	0	0	0	0.83	Root;Bacteria;Bacteroidetes;Bacteroidetes;Bacteroidales;Prevotellaceae;Prevotella	TGAGGAATATTGGTCAATGGGCGAGAGCCTGAACCAGCCAAGTAGCGTGCAGGAAGACGGCCCTATGGGTTGTAAACTGCTTTTATAAGGGAATAAAGTGAGTCACGTGTGACTTTTTGCATGTACCTTATGAATAAGGACCGGCTAATTCCGT
655	0	0	0	8	0	0	0	0	0	0.97	Root;Bacteria;Actinobacteria;Actinobacteria;Actinobacteridae;Actinomycetales;Streptosporangineae;Nocardiopsaceae;Nocardiopsis	TGGGGAATCTTGCGCAATGGGCGGAAGCCTGACGCAGCGACGCCGCGTGGGGGATGACGGCCTTCGGGTTGTAAACCTCTTTTACCACTCACGCAGGCTCCGGGTTTTCTCGGGGTTGACGGTAGGTGGGGAATAAGGACCGGCTAACTACGT
656	0	0	0	0	0	0	0	0	1	1	Root;Bacteria	TTAGGAATATTCGTCAATGGGGGAAACCCTGAACGAGCAATGCCGCGTGAGTGATGACGGTCCTTTGGATTGTAAAACTCTGTTGTTAGGGAAGAACGACCTATATAGGAAATGATATAGGAGTGACGGTACCTTTCAAGAAAGCTCCGGCTAACTACGT
657	0	0	0	0	0	1	0	0	0	0.85	Root;Bacteria;Firmicutes;"Bacilli";"Lactobacillales";"Enterococcaceae"	TAGGGAATCTTCGGCAATGGACGAAAGTCTGACCGAGCAACGCCGCGTGAGTGAAGAAGGTTTTCGGATCGTAAAACTCTGTTGTTAGAGAAGAATAAAGACAGTACCTGTAGAATAAGCTCCGGCTAACTACGT
658	0	0	0	0	0	0	2	0	0	0.95	Root;Bacteria;Proteobacteria;Gammaproteobacteria;Pseudomonadales;Incertae sedis 6;Enhydrobacter	TGGGGAATATTGGACAATGGGGGCAACCCTGATCCAGCCATGCCGCGTGTGTGAAGAAGGCCTTTTGGTTGTAAAGCACTTTTAAGCAGGGAGGAGAGGCTAATGGTTAATACCCATTAGATTAGACGTTACCTGCAGAATAAGCACCGGCTAACTCTGT
659	0	0	0	0	0	0	2	0	0	0.86	Root;Bacteria;Actinobacteria;Actinobacteria;Actinobacteridae;Actinomycetales	TGGGGAATATTGCACAATGGGCGCAAGCCTGATGCAGCGACGCCGCGTGAGGGATGACGGCCTTCGGGTTGTAAACCTCTTTCAATAGGGACGAAGCGCAAGTGACGGTACCGGGAGAATAAGCTCCGGCTAACTCCGT
660	0	0	0	0	0	0	0	1	0	1	Root;Bacteria;Actinobacteria;Actinobacteria;Actinobacteridae;Bifidobacteriales;Bifidobacteriaceae;Bifidobacterium	TGGGGAATATTGCACAATGGGCGCAAGCCTAATGCAGCGACGCCGCGTGCGGGATGACGGCCTTCGGGTTGTAAACCGCTTTTGACTGGGAGCAAGCCCTTCGGGGTGAGTGTACCTTTCGAATAAGCACCGGCTAACTACGT
661	0	0	0	0	0	0	0	12	0	0.88	Root;Bacteria;Bacteroidetes;Bacteroidetes;Bacteroidales;Bacteroidaceae;Bacteroides	TGAGGAATATTGGTCAATGGGCGAGAGCCTGAACCAGCCAAGTAGCGTGAAGGAAGACTGCCCTATGGGTTGTAAACTTCTTTTATACGGGAATAAAGTCATCCACGTGTGGATGTTTGTATGTACCGTATGAATAAGGATCGGCTAACTCCGT
662	0	0	2	0	0	0	0	0	0	1	Root;Bacteria	TTAGGAATCTTCCACAATGGGGGCAACCCTGATGGAGCGACACTGCGTGAAGGATGAAGGCTTTCGGGTCGTAAACTTCTGATAGAGGGACGAATGTTGACGGTACCTCTTGATTAGCACCGGCTAACTCCGT
663	0	0	0	0	0	13	0	0	0	0.82	Root;Bacteria;Firmicutes;"Clostridia";Clostridiales;Clostridiaceae;"Clostridiaceae 1";Clostridium	TGGGGAATATTGCACAATGGGCGAAAGCCTGATGCAGCAACGCCGCGTGGGTGATGAAGGTTTTCGGATCGTAAAGCCCTGTCTTTTGGGACGATAATGACGGTACCAAAGGAGGAAGCCACGGCTAACTACGT
664	0	0	0	0	0	0	0	1	0	0.86	Root;Bacteria;Bacteroidetes	TGAGGAATATTGGTCAATGGGCGAGAGCCTGAACCAGCCAAGCCGCGTGAGGGAAGAAGGCGCTCAGCGTCGTAAACCTCTTTAGCCGGGGGACAAAACCTCCTCGCGAAGGAGGCTTGAGAGTACCCGGAGAATAAGCATCGGCTAACTCCGT
665	0	0	0	0	0	2	0	0	0	0.93	Root;Bacteria;Actinobacteria;Actinobacteria;Actinobacteridae;Actinomycetales;Corynebacterineae;Corynebacteriaceae;Corynebacterium	TGGGGAATATTGCACAATGGGCGCAAGCCTGATGCAGCGACGCCGCGTGGGGGATGACGGCCTTCGGGTTGTAAACTCCTTTCGACAGGGACGAAGCTTATGTGACGGTACCTGTAGAAGAAGCACCGGCTAACTACGT
666	0	0	0	0	0	1	0	0	0	0.98	Root;Bacteria;Bacteroidetes	TGAGGAATATTGGTCAATGGGCGAGAGCCTGAACCAGCCAAGTAGCGTGCAGGAAGACGGCCCTATGGGTTGTAAACTGCTTTTATCGGGGAGCAAGCGTGAGTGAGTTTACCCGTTGAATAAGCACCGGCTAACTACGT
667	0	0	0	0	0	0	0	1	0	1	Root;Bacteria	TGGGGAATATTGGGCAATGGGGGAAACCCTGACCCAGCAACGCCGTGTGAAGGAAGAAGGTTTTCGGATCGTAAACTTCTATCCTTGGTGAAAATAGTGATGGTAGCCAAGGAGGAAGCCCCGGCTAACTACGT
668	0	0	0	0	1	0	0	0	0	0.98	Root;Bacteria;Firmicutes;"Clostridia";Clostridiales;"Lachnospiraceae"	TGGGAAATATTGCACAATGGGGGAAACCCTGATGCAGCGACGCCGCGTGAGTGAAGAAGTAATTCGTTATGTAAAGCTCTATCAGCAAGGAAGAAAATGGCGGTACCTGACTAAGAAGCCCCGGCTAACTACGT
669	0	0	0	0	0	1	0	0	0	0.88	Root;Bacteria;Firmicutes;"Clostridia";Clostridiales;"Ruminococcaceae"	TGGGGGATATTGCACAATGGGGGAAACCCTGATGCAGCGACGCCGCGTGGAGGAAGAAGGTTTTCGGATTGTAAACTCCTGTCGTTAGGGACGATAATGACGGTACCTGAGGAGGAAGCCCCGGCTAACTACGT
670	0	0	0	0	0	0	0	12	0	1	Root;Bacteria	TTGGGAATATTGGACAATGGAGGAAACTCTGATCCAGTGACGCCGCGTGAAGGAAGAAGGTCTTCGGATTGTAAACTTATTTTATCAGGGAAGAAGAAAGTGACAGTACCTGAAGAAAAAGGACCGGCAAACTACGT
671	0	0	0	0	0	1	0	0	0	0.88	Root;Bacteria;Bacteroidetes;Bacteroidetes;Bacteroidales;Prevotellaceae;Prevotella	TGAGGAATATTGGTCAATGGGCGAGAGCCTGAACCAGCCAAGTAGCGTGCAGGATGACGGCCCTATGGGTTGTAAACTGCTTTTATAAGGGAATAAAGTGAGCGACGTGTCGTTTTTTGTAGGTACCATATGAATAAGGACCGGCTAATTCCGT
672	0	0	0	0	0	0	0	0	1	1	Root;Bacteria	TGGGGAATATTGCGCAATGGAGGAAACTCTGACGCAGTGACGCCGCGTGCAGGAAGAAGGTTTTCGGATTGTAAACTGCTTTAGACAGGGAAGAGAAAGGACAGTACCTGTAGAATAAGCATCGGCTAACTCCGT
673	0	0	0	0	2	0	1	1	0	0.91	Root;Bacteria;Firmicutes;"Clostridia";Clostridiales	TGGGGAATATTGCACAATGGGGGAAACCCTGATGCAGCAACGCCGCGTGAAGGATGAAGGTTTTCGGATCGTAAACTTCTATCAATAGGGGACGAAGAAAGTGACGGTACCTAAATAAGAAGCCCCGGCTAACTACGT
674	0	0	0	0	0	0	0	0	1	0.85	Root;Bacteria;Firmicutes;"Clostridia";Clostridiales;"Lachnospiraceae"	TGGGGAATATTGCACAATGGGGGCAACCCTGATCCAGCGACGCCGCGTGATTGAAGAAGTATTTCTGTATGTAAAGCTGTCTCATCAGGGAAGAAAGAAATGACGGTACCTGACTAAGAAGCCCCGGCTAACTACGT
675	0	0	0	0	1	2	0	0	0	0.83	Root;Bacteria;Bacteroidetes;Bacteroidetes;Bacteroidales;Prevotellaceae	TGAGGAATATTGGTCAATGGACGAGAGTCTGAACCAGCCAAGTAGCGTGCAGGATGACGGCCCTATGGGTTGTAAACTGCTTTTGTAAGGGAATAAAGTGAGCCTCGTGAGGCTTTTTGCATGTACCTTATGAATAAGGACCGGCTAATTTCAT
676	0	0	0	0	9	2	0	0	1	0.9	Root;Bacteria;Firmicutes;"Clostridia";Clostridiales;"Ruminococcaceae"	TGGGGGATATTGCACAATGGAGGGAACTCTGATGCAGCGACGCCGCGTGAGGGAAGAAGGTCTTCGGATTGTAAACCTCTGTCTTCGGTGACGAAAATGACGGTAGCCGAGGAGGAAGCCACGGCTAACTACGT
677	0	0	0	0	556	71	0	286	121	0.89	Root;Bacteria;Firmicutes;"Clostridia";Clostridiales;"Lachnospiraceae";"Lachnospiraceae Incertae Sedis"	TGGGGAATATTGCACAATGGGGGAAACCCTGATGCAGCGACGCCGCGTGAGTGAAGAAGTATTTCGGTATGTAAAGCTCTATCAGCAGGGAAGAAAATGACGGTACCTGACTAAGAAGCCCCGGCTAACTACGT
678	0	0	0	0	0	0	0	1	0	1	Root;Bacteria	TGGGGAATATTGGGCAATGGAGGAAACTCTGACCCAGCAACGCCGCGTGAGGAAAGAAGGTTTTCGGAATCGTAAACTCCTGTCCTTGGAGACGAATAGAAGAACGGTATCCAAGGAGGAAGCCCCGGCTAACTACGT
679	0	0	0	0	0	0	11	0	0	1	Root	ACCTCCCGAGAAACTGATGTAAGGGAATTAGGCCCACCCCCTAAAGAATGCATGTACACACATTTCTGCGTATGATTTCAGAACTTCACAGACCCTCTGAAGCTCCCGAAGCCCAATACGACCTGCTACTCAAAGTGAGGTCACCAG
680	0	0	0	0	0	0	1	0	0	1	Root;Bacteria	TGGGGAATTTTCCGCAATGGGCGAAAGCCTGACGGAGCAATGCCGCGTGGAGGTAGAAGGCCTTAGGGTTGTAAAGCTCTTTAAGCTGGGAAGATAATGACGGTACCAGCAGAAGAAGCCCCGGCTAACTCCGT
681	0	0	0	0	0	0	9	0	0	0.89	Root;Bacteria;Proteobacteria;Betaproteobacteria;Burkholderiales;Oxalobacteraceae	TGGGGAATTTTGGACAATGGGGGCAACCCTGATCCAGCAATGCCGCGTGAGTGAAGAAGGCCCTCGGGTTGTAAAGCTCTTTTGTCAGGGGAAGAAACGGTGGTCGCTAATATCGGCTGCTAATGACGGTACCTGAAGAATAAGCACCGGCTAACTACGT
682	0	0	0	0	1	0	0	5	0	1	Root;Bacteria;Bacteroidetes;Bacteroidetes;Bacteroidales;Bacteroidaceae;Bacteroides	TGAGGAATATTGGTCAATGGGCGCAGGCCTGAACCAGCCAAGTAGCGTGAAGGATGACTGCCCTATGGGTTGTAAACTTCTTTTATAAAGGAATAAAGTCGGGTATGTATACCCGTTTGCATGTACTTTATGAATAAGGATCGGCTAACTCCGT
683	0	0	0	0	0	0	0	0	1	0.82	Root;Bacteria;Bacteroidetes	TGAGGAATATTGGTCAATGGAAGAGATTCTGAACCAGCCAAGCCGCGTGAGGGAAGACGGCCCTACGGGTTGTAAACCTCTTTTGTCGGGGAACAAAGAGCGGGACGTGTCCCGCGTTGAGTGTACCCGAAGAAAAAGCATCGGCTAACTCCGT
684	0	0	1	0	0	0	0	0	0	1	Root;Bacteria;Bacteroidetes;Flavobacteria;Flavobacteriales;Flavobacteriaceae;Flavobacterium	TGAGGAATATTGGACAATGGGCGCAAGCCTGATCCAGCCATGCCGCGTGCAGGATGACGGTCCTATGGATTGTAAACTGCTTTTATACGAGAAGAAACACTCCTTCGTGAAGGAGCTTGACGGTATCGTAAGAATAAGGATCGGCTAACTCCGT
685	0	0	502	91	0	0	0	0	0	0.85	Root;Bacteria;Firmicutes;"Bacilli";Bacillales;Bacillaceae;"Bacillaceae 2";Cerasibacillus	TAGGGAATCTTCCGCAATGGACGCAAGTCTGACGGAGCAACGCCGCGTGAGTGATGAATGTCTTCGGATTGTAAAACTCTGTTGTTAGGGAAGAACAAGTACCGTTCAAATAGGTCGGTACCTTGACGGTACCTAACCAGAAAGCCCCGGCTAACTACGT
686	0	0	0	0	0	0	0	2	0	0.99	Root;Bacteria;Bacteroidetes;Bacteroidetes;Bacteroidales;Bacteroidaceae;Bacteroides	TGAGGAATATTGGTCAATGGACGCGAGTCTGAACCAGCCAAGTAGCGTGAAGGATGACTGCCCTATGGGTTGTAAACTTCTTTTATATGGGAATAAAGTTGTCCACGTGTGGATTTTTGTATGTACCATATGAATAAGGATCGGCTAACTCCGT
687	1	0	0	0	0	0	0	0	0	0.84	Root;Bacteria;Proteobacteria	TGGGGAATCTTGGACAATGGGGGCAACCCTGATCCAGCGACGCCGCGTGGGTGACGAAGGCCTTCGGGTTGTAAAGCCCTTTTGTCGGGGACGATGATGACGGTACCCGGCGAATCAGCACCGGCTAACTCCGT
688	0	0	0	0	1	0	0	0	0	0.89	Root;Bacteria;Firmicutes	TAAGGAATTTTCGGCAATGGGCGAAAGCCTGACCGAGCAACGCCGCGTGAGTGATGAAGGCCTTCGGGTTGTAAAGCTCTGTTGTAAAGGAAGAATGTACAGAAAAGGAAATGTTTCTGTAGTGACGGTACTTTACTAGAAAGTCACGGCTTACTACGT
689	0	0	0	0	1	0	0	0	0	0.89	Root;Bacteria;Bacteroidetes;Bacteroidetes;Bacteroidales;Prevotellaceae	TGAGGAATATTGGTCAATGGGCGAGAGCCTGAACCAGCCAAGTAGCGTGCAGGAAGACGGCCCTCTGGGTTGTAAACTGCTTTTAGTTGGGAATAAAGTGCACCACGTGTGGTGTTTGTATGTACCATCAGAAAAGGACCGGCTAATTCCGT
690	0	0	0	0	0	1	0	0	0	0.85	Root;Bacteria;Firmicutes;"Clostridia";Clostridiales	TGGGGAATCTTCCGCAATGGGCGAAAGCCTGACGGAGCAATGCCGCGCGAGTGAAGAAGGCCTTCGGGTTGTAAAGCTCTATCCTTGTCCAAGAGAGCAGATGATAGTAACTGATTATCTGAGGACGGTAGACAAGAAGGAAGCCCCGGCTAACTATGT
691	0	0	0	0	0	0	0	0	1	0.94	Root;Bacteria;Bacteroidetes	TGAGGAATATTGGTCAATGGGCGAAAGCCTGAACCAGCCAAGTCGCGTGAGGGATGACGGTCCTATGGATTGTAAACCTCTTTTGCAGGGGAGCAAAGCCGCCCACGTGTGGGCGGAAGGAGAGTACCCTGAGAAAAAGCATCGGCTAACTCCGT
692	0	0	0	0	0	2	0	0	0	0.96	Root;Bacteria;Proteobacteria;Gammaproteobacteria;Chromatiales;Ectothiorhodospiraceae	TGGGGAATATTGGACAATGGGCGAAAGCCTGGTCCAGCAATGCCGCGTGGGTGAAGAAGGCTTGCGGGTTGTAAAGCCCTTTCAGCCGGGAGGAAAAGCGTCGGGTTAATACCCTGGCGTATTGACGTTACCGGCAGAAGAAGCACCGGCTAACTCCGT
693	0	0	0	0	0	0	0	0	1	1	Root;Bacteria	TGGGGAATATTGGGCAATGGGCGAAAGCCTGACCCAGCAACGCCGCGTGAGGGAAGAAGGCCTTCGGGTTGTAAACCTCTGTCCTTAGTGACGAAGGAAGTGACGGTAGCTAAGGAGGAAGCCCCGGCTAACTACGT
694	0	0	0	0	0	0	0	1	0	0.9	Root;Bacteria;Bacteroidetes	TGAGGAATATTGGTCAATGGTCGGCAGACTGAACCAGCCAAGTCGCGTGAGGGAAGACGGCCCTACGGGTTGTAAACCTCTTTTGTCGGAGAGTAAAGTACGCTACGTGTAGCGTATTGCAAGTATCCGAAGAAAAAGCATCGGCTAACTCCGT
695	0	0	0	0	24	0	0	0	0	0.85	Root;Bacteria;Bacteroidetes	TGAGGAATATTGGTCAATGGGCGGAAGCCTGAACCAGCCATGCCGCGTGACGGAATACGGCCCTATGGGTCTTAAACGTCTTTGGTCCCGGAGCAATAAGAGCCACGCGTGGCTCGATGAGAGTACGGGAAGAACAAGCATCGGCTAACTCCGT
696	0	0	0	0	0	1	0	0	0	0.89	Root;Bacteria;Firmicutes;"Bacilli";"Lactobacillales";"Enterococcaceae"	TAGGGAATCTTCGGCAATGGACGAAAGTCTGACCGAGCAACGCCGCGTGAGTGAAGAAGGTTTTCGGATCGTAAAACTCTGTTGTTAGAGAAGAACAAGGATGAGAGTAACTGTTCATCCCTTGACGGTACCTCGCCAGAAAGTGACGGCTAACTACGT
697	0	0	0	0	0	0	0	0	1	1	Root;Bacteria	TGGGGGATATTGCACAATGGGGGAAACCCTGATGCAGCAACGCCGCGTGTGGGAAGAAGGTTTTCGGATTGTAAACCACTGTTCTTGGTGAAGATAATGACGGTAGCCAAGGAGAAAGCTCCGGCTAACTACGT
698	0	0	0	0	1	0	35	0	0	0.96	Root;Bacteria;Bacteroidetes;Sphingobacteria;Sphingobacteriales;Flexibacteraceae	TAGGGAATATTGGGCAATGGACGCAAGTCTGACCCAGCCATGCCGCGTGCAGGATGAAGGCGTTATGCGTTGTAAACTGCTTTTATACAGGAAGAAACGACTCTTGCGAGAGGCATTGACGGTACTGTATGAATAAGCACCGGCTAACTCCGT
699	0	0	0	0	0	1	0	0	0	0.8	Root;Bacteria;Firmicutes;"Bacilli";Bacillales	TAGGGAATCTTCGGCAATGGGGGAAACCCTGACCGAGCAACGCCGCGTGAGTGAGGAAGGTCTTCGGATCGTAAAGCTCTGTTGCCAGGGAAGAACGCCTTGGGGAGGAAATGCCCTGAGGGTGACGGTACCTGAGAAGAAAGCCCCGGCTAACTACGT
700	0	0	0	0	0	2	0	0	0	1	Root;Bacteria;Firmicutes;"Erysipelotrichi";"Erysipelotrichales";Erysipelotrichaceae;Turicibacter	ACGTAGTTAGCCGTGGCTTTCTCATAAGGTACCGTCACACTCTAGCCATTTCCTACTAAAGTCGTTCTTCCCTTATAACAGAATTTTACAACCCGAAGGCCTTCATCATTCACGCGGCGTTGCTCGGTCAGGCTTTCGCCCATTGCCGAAGATTCCCTA
701	0	0	0	0	0	1	0	0	0	0.96	Root;Bacteria;Firmicutes;"Bacilli";"Lactobacillales";Lactobacillaceae;Lactobacillus	ACGTAGTTAGCCGTGACTTTCTAGGTAATTACCGTCAAATAAAGGCCAGTTACTACCTCTATCTTCTTCACTACCAACAGAGCTTTACGAGCCGAAACCCTTCTTCACTCACGCGGCGTTGCTCCATCAGACTTGCGTCCATTGTGGAAGATTCCCTA
702	0	0	0	0	1	0	0	0	0	0.99	Root;Bacteria;Firmicutes;"Clostridia";Clostridiales;"Lachnospiraceae"	ACGTAGTTAGCCGGGGCTTCTTAGTCAGGTACTGTCATTATCTTCCCTGCTGATAGAGCTTTACATACCGAAATACTTCTTCACTCACGCGGCGTCGCTGCATCAGAGTTTCCTCCATTGTGCAATATCCCCCA
703	0	0	0	0	0	0	0	4	1	1	Root;Bacteria	TGGGGAATATTGGGCAATGGGCGAAAGCCTGACCCAGCAACGCCGCGTGAAGGAAGAAGGCTTTCGGGTTGTAAACTTCTTTTATCAGGGACGAAGGATGTGACGGTACCTGATGAATAAGCCACGGCTAACTACGT
704	0	0	0	0	0	0	0	2	2	1	Root;Bacteria	TGGGGAATATTGGGCAATGGGGGAAACCCTGACCCAGCAACGCCGCGTGAGGGAAGAAGGTCTTCGGATTGTAAACCTCTTTTACCAGGGAAGAAGAAAGTGACGGTACCTGGAGAAAAAGCCACGGCTAACTACGT
705	0	0	0	0	0	0	7	0	0	0.89	Root;Bacteria;Proteobacteria;Alphaproteobacteria;Rhizobiales;Rhizobiaceae;Rhizobium	TGGGGAATATTGGACAATGGGCGCAAGCCTGATCCAGCCATGCCGCGTGAGTGATGAAGGCCTTAGGGTTGTAAAGCTCTTTCACCGGAGAAGATAATGACGGTATCCGGAGAAGAAGCCCCGGCTAACTTCGT
706	0	0	0	0	0	0	3	0	0	0.95	Root;Bacteria;Proteobacteria;Gammaproteobacteria;Legionellales;Legionellaceae	TGGGGAATATTGGACAATGGGGGCAACCCTGATCCAGCAATGCCGCGTGTGTGAAGAAGGCCTGAGGGTTGTAAAGCACTTTCAGTGGGGAGGAGGGATGCTTGGTTAAGAGCTGAGTATTTGGACGTTACCCACAGAAGAAGCACCGGCTAACTCCGT
707	0	0	0	0	0	0	3	0	0	0.85	Root;Bacteria;Proteobacteria;Alphaproteobacteria;Sphingomonadales;Sphingomonadaceae	TGGGGAATGTTGGACAATGGGCGCAAGCCTGATCCAGCAATGCCGCGTGAGTGATGAAGGCCTTAGGGTTGTAAAGCTCTTTTACCCGGGAAGATAATGACTGTACCGGGAGAATAAGCCCCGGCTAACTCCGT
708	0	0	0	0	2	0	0	0	0	0.93	Root;Bacteria;Firmicutes	TAGGGAATCTTCCGCAATGGACGAAAGTCTGACGGAGCAACGCCGCGTGAGAGAAGAAGGCCTTCGGGTCGTAAAGCTCTGTTATTAGAGAAGAACCTTCAGTAGACGAATAGACTATTGAACTGACGGTATCTAAGAAGAAAGCCACGGCTAACTACGT
709	0	0	0	0	224	98	0	0	1	0.9	Root;Bacteria;Proteobacteria;Gammaproteobacteria;Aeromonadales;Succinivibrionaceae;Succinivibrio	TAGGGAATATTGCACAATGGAGGAAACTCTGATGCAGCCATGCCGCGTGTGTGAAGAAGGCCTTCGGGTTGTAAAGCACTTTCGGAGGGGAGGAATGAAATGACGTTACCCTCAGAAGAAGCACCGGCTAACTCCGT
710	0	0	0	0	79	55	0	56	1	0.93	Root;Bacteria;Firmicutes;"Clostridia";Clostridiales	TGGGGGATATTGCGCAATGGGGGAAACCCTGACGCAGCAACGCCGCGTGAAGGATGAAGGTTTTCGGATTGTAAACTTCTTTTATTTAGGACGAAGAATGACGGTACTAAATGAATAAGCTCCGGCTAACTACGT
711	0	0	0	1	0	0	0	0	0	0.87	Root;Bacteria;Proteobacteria;Betaproteobacteria;Burkholderiales;Comamonadaceae;Comamonas	TAGGGAATCTTCCGCAATGGGCGCAAGCCTGATCCAGCAATGCCGCGTGCAGGATGAAGGCCTTCGGGTTGTAAACTGCTTTTGTACGGAACGAAAAGCCCTGGGTTAATACCCTGGGGTCATGACGGTACCGTAAGAATAAGCACCGGCTAACTACGT
712	0	0	0	2	0	0	0	0	0	0.85	Root;Bacteria;Firmicutes;"Bacilli";Bacillales	TAGGGAATCTTCCGCAATGGACGAAAGTCTGACGGAGCAATACCGCGTGAGTGATGAAGGTCTTCGGATCGTAAAACTCTGTTGTTAGGGAAGAACAAGTGCTAATCTAATACATTAGTGCCCTGACCGTACCTAACCAGAAAGCCCCGGCTAACTACGT
713	0	0	0	0	0	0	0	2	0	1	Root;Bacteria	TGGGGAATATTGCACAATGGGGGAAACCCTGATGCAGCAACGCCGCGTGAAGGAAGAAGGCCTTTGGGTCGTAAACTTCTGTTCTGAGGGAAGAAAGTGACGGTACCTCAGGAGCAAGTCCCGGCTAACTACGT
714	0	0	0	0	0	2	0	0	0	1	Root;Bacteria;Firmicutes;"Bacilli";"Lactobacillales";Streptococcaceae	TAGGGAATCTTCGGCAATGGGGGCAACCCTGACCGAGCAACGCCGCGTGAGTGAAGAAGGTTTTCGGATCGTAAAGCTCTGTTGTTAGAGAAGAACGTTGGTGGGAGTGGAAAATCCATCAAGTGACGGTAACTAACCAGAAAGGGACGGCTAACTACGT
715	0	0	0	0	0	0	3	0	0	0.97	Root;Bacteria;Proteobacteria;Betaproteobacteria;Burkholderiales;Oxalobacteraceae	TGGGGAATTTTGGACAATGGGGGCAACCCTGATCCAGCAATGCCGCGTGAGTGAAGAAGGCCTTCGGGTTGTAAAGCTCTTTTGTCAGGGGAAGAAAACGGTGAGGGCTAATATCCCTTGCTAATGACGGTACCTGAAGAATAAGCACCGGCTAACTACGT
716	0	0	0	0	0	0	1	0	0	0.88	Root;Bacteria;Proteobacteria;Gammaproteobacteria;Legionellales;Legionellaceae	TGGGGAATATTGGACAATGGGGGCAACCCTGATCCAGCAATGCCGCGTGTGTGAAGAAGGCCTGAGGGTTGTAAAGCACTTTCAGTGGGGAGGAGGCTTGTTAGGTTAAGAGCTAGATAAGTGGACGTTACCTGAAGAATAAGCACCGGCTAACTACGT
717	0	0	0	0	1	0	0	0	0	0.98	Root;Bacteria;Bacteroidetes;Bacteroidetes;Bacteroidales;Bacteroidaceae;Bacteroides	TGAGGAATATTGGTCAATGGGCGCAGGCCTGAACCAGCCAAGTAGCGTGAAGGATGAAGGCTCTATGGGTCGTAAACTTCTTTTATATGGGAATAAAGTTTTCCACGTGTGGAATTTTGTATGTACCATATGAATAAGGATCCGGCTAACTCCGT
718	0	0	0	0	0	5	0	0	0	0.93	Root;Bacteria;Actinobacteria;Actinobacteria;Coriobacteridae;Coriobacteriales;Coriobacterineae;Coriobacteriaceae	TGGGGAATCTTGCGCAATGGGGGCAACCCTGACGCAGCGACGCCGCGTGCGGGATGGAGGCCTTCGGGTCGTAAACCGCTTTCAGCAGGGGACGAGGAAAGACGGTACCTGCAGAAGAAGCCCCGGCTAACTACGT
719	0	0	0	1	0	0	0	0	0	1	Root;Bacteria;Firmicutes;"Bacilli";"Lactobacillales";"Carnobacteriaceae";"Carnobacteriaceae 2";Granulicatella	TAGGGAATCTTCCGCAATGGACGCAAGTCTGACGGAGCAACGCCGCGTGAGTGAAGAAGGATTTCGGTTCGTAAAACTCTGTTGTTAGAGAAGAACAGCGCATAGAGTAACTGTTATGCGTGTGACGGTATCTAACCAGAAAGCCACGGCTAACTACGT
720	0	0	0	0	1	0	0	0	0	0.97	Root;Bacteria;Verrucomicrobia;Verrucomicrobiae;Verrucomicrobiales;Subdivision 3;Subdivision 3_genera_incertae_sedis	TCGAGAATTTTTCTCAATGGGCGAAAGCCTGAAGGAGCGACGCCGCGTGGGGGATGAAGGGCTTCGGCTCGTAAACCCCTGTCATTTGCGAACAAACCTTACGATTGAATAGATCGTGAGCTGATTGTAGCGAAAGAGGAAGGGACGGCTAACTCTGT
721	0	0	0	0	0	0	1	0	0	1	Root;Bacteria	TGGGGAATTTTCCGCAATGGGCGAAAGCCTGACGGAGCAATGCCGCGTGGAGGTAGAAGGCCCACGGGTCGTGAACTTCTTTTCCCGGAGAAGAAGCAAATGACGTTACCCGCAGAAGAAGCACCGGCTAACTCCGT
722	0	0	0	0	0	1	0	0	0	0.99	Root;Bacteria	TGGGGGATATTGCGCAATGGGGGAAACCCTGACGCAGCAACGCCGCGTGAAGGATGAAGGTTTTCGGATTGTAAACTGCTTTTATAAGGGAATAAAGTTAGCCTCGTGAGGCTTTTTGCATGTACCTTATGAATAAGGACCGGCTAATTCCGT
723	0	0	0	0	0	0	0	0	2	0.9	Root;Bacteria;Actinobacteria;Actinobacteria;Coriobacteridae;Coriobacteriales;Coriobacterineae;Coriobacteriaceae	TGGGGAATTTTGCGCAATGGGGGAAACCCTGACGCAGCAACGCCGCGTGCGGGACGAAGGCCTTCGGGTTGTAAACCGCTTTCAGCAGGGAATATCGTGAAGGTACCTGCAGAAGAAGCTCCGGCTAACTACGT
724	0	0	0	0	0	0	1	0	0	0.9	Root;Bacteria;Proteobacteria;Alphaproteobacteria;Sphingomonadales;Sphingomonadaceae	TGGGGAATATTGGACAATGGGGGGAACCCGTGATCCAGCCATGCCGCGTGTGTGATGAAGGCCTTAGGGTTGTAAAGCTCTTTTACCCGGGGATGATAATGACAGTACCGGGAGAATAAGCTCCGGCTAACTCCGT
725	0	0	0	0	0	0	118	0	0	0.99	Root;Bacteria;Proteobacteria;Gammaproteobacteria;Pseudomonadales;Moraxellaceae;Acinetobacter	TGGGGAATATTGGACAATGGGGGGAACCCTGATCCAGCCATGCCGCGTGTGTGAAGAAGGCCTTATGGTTGTAAAGCACTTTAAGCGAGGAGGAGGGTACTGGTATTAATACTACCAGCTACTGGACGTTACTCGCAGAATAAGCACCGGCTAACTCTGT
726	0	0	0	0	0	0	42	0	0	0.88	Root;Bacteria;Bacteroidetes;Flavobacteria;Flavobacteriales;Cryomorphaceae;Fluviicola	TGAGGAATATTGGTCAATGGGCGCAAGCCTGAACCAGCCATGCCGCGTGCAGGAAGACGGTCCTATGGATTGTAAACTGCTTTTATTTGGGAATAAACCTATCTACGTGTAGATAGCTGAAGGTACCAAATGAATAAGCACCGGCTAACTCCGT
727	0	0	4	1	0	1	56	0	0	1	Root;Bacteria;Actinobacteria;Actinobacteria;Actinobacteridae;Actinomycetales	TGGGGAATATTGCGCAATGGGCGGAAGCCTGACGCAGCGACGCCGCGTGGGGGATGACGGCCTTCGGGTTGTAAACCTCTTTCAGCAGGGACGAAGCGAGAGTGACGGTACCTGCAGAAGAAGCACCGGCCAACTACGT
728	0	0	0	0	0	0	49	0	0	0.98	Root;Bacteria;Proteobacteria;Gammaproteobacteria	TGGGGAATATTGGACAATGGGGGCAACCCTGATCCAGCGATGCCGCGTGTGTGAAGAAGGCCTGAGGGTTGTAAAGCACTTTCAGTGGGGAGGAGAGTTTGCGGGTTAAGAGCTTGCTGACGAGACGTTACCCACAGAAGAAGCACCGGCTAACTCCGT
729	0	0	0	0	0	0	104	0	0	0.99	Root;Bacteria;Actinobacteria;Actinobacteria;Actinobacteridae;Actinomycetales;Corynebacterineae	TGGGGAATATTGCACAATGGGCGCAAGCCTGATGCAGCGACGCCGCGTGAGGGATGACGGCCTTCGGGTTGTAAACCTCTTTCAATAGGGACGAAGCGCAAGTGACGGTACCTATAGAAGAAGCACCGGCCAACTACGT
730	0	0	0	0	0	0	99	0	0	1	Root;Bacteria;Proteobacteria;Gammaproteobacteria;Enterobacteriales;Enterobacteriaceae	TGGGGAATATTGCACAATGGGCGCAAGCCTGATGCAGCCATGCCGCGTGTATGAAGAAGGCCTTCGGGTTGTAAAGTACTTTCAGCGAGGAGGAAGGCATTAAGGTTAATAACCTTAGTGATTGACGTTACTCGCAGAAGAAGCACCGGCTAACTCCGT
731	0	0	0	0	1	0	0	0	0	0.9	Root;Bacteria;Proteobacteria;Gammaproteobacteria	TGGGGAATATTGCACAATGGGGGAAACCCTGATGCAGCGACGCCGCGTGAGTGAAGAAGGCCTTCGGGTTGTAAAGCACTTTCGGAGGGGAGGAATGAAATGACGTTACCCTCAGAAGAAGCACCGGCTAACTCCGT
732	0	0	0	0	1	0	0	0	0	0.81	Root;Bacteria;Actinobacteria;Actinobacteria	TGGGGAATCTTGCGCAATGGGCGAAAGCCTGACGCAGCGACGCCGCGTGCGGGAAGAAGGCCTTCGGGTTGTAAACCGCTTTCAGGAGGGACGAAGCCACTCGGGTTAATAGCCTAGAGGGTGACGGTACCTCCAGAAGAAGCCCCGGCTAACTACGT
733	0	0	0	0	0	55	0	0	1	0.99	Root;Bacteria;Firmicutes;"Bacilli";"Lactobacillales";"Enterococcaceae";Enterococcus	TAGGGAATCTTCGGCAATGGACGAAAGTCTGACCGAGCAACGCCGCGTGAGTGAAGAAGGTTTTCGGATCGTAAAACTCTGTTGTTAGAGAAGAACAAGGATGAGAGTAACTGTTCATCCCTTGACGGTATCTAACCAGAAAGCCACGGCTAACTACGT
734	0	0	0	0	1	0	0	0	0	0.88	Root;Bacteria;Bacteroidetes;Bacteroidetes;Bacteroidales	TGAGGAATATTGGTCAATGGGCGAGAGCCTGAACCAGCCAAGTAGCGTGAGGGATGACTGTCCTATGGGTTGTAAACCTCTTTTGTTTGGGAATAAAATGACGGTACCTGACTAAGAAGCCCCGGCTAACTACGT
735	0	0	5	6	0	1	0	0	0	0.86	Root;Bacteria;Firmicutes;"Bacilli";Bacillales;Bacillaceae;"Bacillaceae 1";Bacillus;Bacillus a	TAGGGAATCTTCCGCAATGGACGAAAGTCTGACGGAGCAACGCCGCGTGAGTGATGAAGGTTTTCGGATCGTAAAGCTCTGTTGTTAGGGAAGAACAAGTACCGTTCAAATAGGGCGGTACCTTGACGGTACCTAACCAGAAAGCCACGGCTAACTACGT
736	0	0	0	0	0	1	0	0	0	0.82	Root;Bacteria;Firmicutes;"Clostridia";Clostridiales;Clostridiaceae	TGGGGAATATTGCACAATGGGGGAAACCCTGATGCAGCAACGCCGCGTGAGTGATGACGGCCTTCGGGTTGTAAAGCTCTGTCTTCAGGGACGATAATGACGGTACCTTACCAGAAAGCTACGGCTAACTACGT
737	0	0	0	0	1	0	0	0	0	0.8	Root;Bacteria;Firmicutes;"Bacilli";Bacillales	TAGGGAATTTTCCGCAATGGGCGAAAGCCTGACGGAGCAACGCCGCGTGAGTGAGGACGGCTTTCGGGTTGTAAAACTCTGTTCTTCGGGAAGAACGGTGGGAGGGTGAAGAGCCCCTTTTGCGTGACGGTACCGAAGAAGAAAGCCCCGGCTAACTACGT
738	0	0	1	0	0	0	0	0	0	0.8	Root;Bacteria;Firmicutes;"Bacilli"	TGGGGAATATTGCACAATGGAGGAAACTCTGATGCAGCGACGCCGCGTGAGCGATGAAGGTCTTCGGATCGTAAAAGCTCTGTTGTTAGGGAAGAACAAGTACTGGAGTAACTGCCGGTACCTTGACGGTACCTAACCAGAAAGCCCCGGCTAACTACGT
739	0	0	0	0	4	3	0	0	0	0.99	Root;Bacteria;Firmicutes;"Clostridia";Clostridiales;"Lachnospiraceae"	TGGGGAAGTATTGCACAATGGGGGAAACCCGTGATGCAGCGACGCCGCGTGAGCGATGAAGTATTTCGGTATGTAAAGCTCTATCAGCAGGGAAGATAATGACGGTACCTGACTAAGAAGCACCGGCTAAATACGT
740	0	0	0	0	0	0	0	0	1	0.93	Root;Bacteria;Bacteroidetes	TGAGGAATATTGGTCAATGGGCGGAAGCCTGAACCAGCCAAGTCGCGTGAAGGATGAAGGCATTATGTGTTGTAAACTTCTTTAGCTGTGGAGAAATAAGGTGCTCGTGAGCACCGATGCTAGTACACAGAGAATAAGGATCGGCTAACTCCGT
741	0	0	0	0	35	7	0	3	0	0.96	Root;Bacteria;Firmicutes;"Clostridia";Clostridiales;"Lachnospiraceae";Roseburia	TGGGGAATATTGCACAATGGGGGAAACCCTGATGCAGCGACGCCGCGTGAGCGAAGAAGTATTTCGGTATGTAAAGCTCTATCAGCAGGGAGAAGAATGACGGTACCTGACTAAGAAGCACCGGCTAAATACGT
742	0	0	0	0	3	0	0	0	0	0.97	Root;Bacteria;Firmicutes;"Clostridia";Clostridiales;"Lachnospiraceae"	TGGGGAATATTGCACAATGGGGGGAACCCTGATGCAGCGACGCCGCGTGAGCGAAGAAATATTTCGGTATGTAAAGCTCTATCAGCAGGGAAGAAAAAATGACGGTACCTGACTAAGAAGCACCAGCTAAATACGT
743	0	0	0	0	0	0	0	0	1	1	Root;Bacteria	TGGGGAATATTGCGCAATGGAGGCAACTCTGACGCAGCGATGCCGCGTGAGTGAGGAAGGGATTCGTCCCGCAGAGCTCAGTCGAAGGGGAAAAGAGAGATTCAACCCTTTTTTCAAGCCCCGGCTAACTACGT
744	0	0	0	0	0	2	0	0	0	0.98	Root;Bacteria;Actinobacteria;Actinobacteria;Coriobacteridae;Coriobacteriales;Coriobacterineae;Coriobacteriaceae	TGGGGAATCTTGCGCAATGGGGGCAACCCTGACGCAGCGACGCCGCGTGCGGGACGAAGGCCTTCGGGTCGTAAACCGCTTTCAGCAGGGGACGAGGCCTTCGGGTGACGGTACCTGCAGAAGAAGCCCCGGCTAACTACGT
745	0	0	0	0	0	0	0	1	0	0.99	Root;Bacteria;Firmicutes;"Clostridia";Clostridiales;"Lachnospiraceae"	TGGGGAATATTGCACAATGGGGGAAACCCTGATGCAGCGACGCCGCGTGAGCGAAGAAGTATTTCGGTATGTAAAGCTCTATCAGCAGGGAAGAAAATGACGGTACCTGACTAAAAAGCCCAGGCTAATTATGT
746	0	0	293	6	0	0	0	0	0	0.97	Root;Bacteria;Firmicutes;"Bacilli";Bacillales;Bacillaceae	TAGGGAATCTTCCGCAATGGACGCAAGTCTGACGGAGCAACGCCGCGTGAGTGACGAAGGTCTTCGGATCGTAAAACTCTGTTGTTAGGGAAGAACAAGTATCGTTCGAATAGGGCGGTACCTTGACGGTACCTAACCAGAAAGCCCCGGCTAACTACGT
747	0	0	0	0	0	1	0	0	0	0.87	Root;Bacteria;Actinobacteria;Actinobacteria;Coriobacteridae;Coriobacteriales;Coriobacterineae;Coriobacteriaceae	TGGGGAATCTTGCGCAATGGGCGGAAGCCTGACGCAGCGACGCCGCGTGCGGGACGAAGGCCTTCGGGTTGTAAACCGCTTTCAGCAGGGATGAGGCCGAGAGGTGACAGTACCTGCAGAAGAAGCCCCGGCTAACTACGT
748	0	0	0	0	0	2	0	0	0	0.83	Root;Bacteria;Firmicutes;"Bacilli";Bacillales;Bacillaceae	TAGGGAATCATCCGCAATGGACGAAAGTCTGACGGTGCAACGCCGCGTGAGTGATGAAGGTTTTCGGATCGTAAAACTCTGTTGTCAGGGAAGAACAAGTACCGTTTGAATAAGGCGGTACCGTGACGGTACCTGACCAGAAAGCCCCGGCTAACTACGT
749	0	0	0	0	1	0	0	0	0	1	Root;Bacteria	TGGGGAATATTGGGCAATGGGGGAAACCCTGACCCAGCAACGCCGCGTGAAGGAAGAAGGCTTTCGGGTTGTAAACCGCTTTCAGCAGGGAAGAGTCAAGACTGTACCTGCAGAAGAAGCCCCGGCTAACTACGT
750	0	0	0	0	0	2	0	0	0	0.98	Root;Bacteria;Firmicutes;"Clostridia";Clostridiales	TGGGGAATATTGCACAATGGGGGAAACCCTGATGCAGCAACGCCGCGTGAGTGATGACGGCCTTCGGGTTGTAAAGCTCTGTCCTCAAGGAAGATAATGACGGTACTTGAGGAGGAAGCCCCGGCTAACTACGT
751	0	0	0	0	2	0	0	0	0	0.99	Root;Bacteria	TAGGGAATCTTGCACAGTGGGCGAAAGCCTGATGCAGCAATGCCGCGTGAGTGAAGAAGTTTTTCGGAATGTAAAACTCTGTTATATGGGAAGAACGACTAGAGGAGGAAATGTCTTTAGAGTGACGGTACCATATGAGAAAGGGACGGCTAACTACGT
752	0	0	0	0	0	0	0	3	0	0.88	Root;Bacteria;Firmicutes;"Clostridia";Clostridiales;"Ruminococcaceae";"Ruminococcaceae Incertae Sedis"	TGGGGGATATTGCACAATGGGGGAAACCCTGATGCAGCAACGCCGCGTGAGGGAAGAAGGTTTTCGGATTGTAAACCTCTGTTCTTAGTGACGATAATGACGGTAGCTAAGGAGAAAGCTCCGGCTAACTACGT
753	0	0	3	0	0	0	0	0	0	0.83	Root;Bacteria;Firmicutes;"Clostridia"	TGGGGAATATTGCACAATGGGCGAAAGCCTGATGCAGCAACGCCGCGTGAAGGAAGAAGGTCTTCGGATTGTAAACTTCTATCAGTAGGGAAGAAAAGGAATTGAAATACATTCCTCTGACGGTACCTAACTAAGAAGCTCCGGCTAACTACGT
754	0	0	0	0	0	0	2	0	0	1	Root;Bacteria;Proteobacteria;Gammaproteobacteria	TGGGGAATATTGGACAATGGGGGAAACCCTGATCCAGCCATGCCGCGTGTGTGAAGAAGGCCTTTTGGTTGTAAAGCACTTTAAGCAGTGAAGAAGACTCCGTGGTTAATACCTTTGCTCATTGACGTTACCCGCAGAAGAAGCACCGGCTAACTCCGT
755	0	0	0	0	0	0	1	0	0	1	Root;Bacteria	TAAGGAATATTGGACAATGGGCGAAAGCCTGATCCAGCCATGTCGCGTGAAGGATTAAGGTCCTCTGGATTGTAAAGCACTTTAAGCGAGGAGGAGGGTACTGGTATTAATACTACCAGCTACTGGACGTTACTCGCAGAATAAGCACCGGCTAACTCTGT
756	0	0	0	0	0	0	19	0	0	0.95	Root;Bacteria;Bacteroidetes;Sphingobacteria;Sphingobacteriales;Crenotrichaceae	TAAGGAATATTGGTCAATGGACGCAAGTCTGAACCAGCCATGCCGCGTGGAGGATGAAGGCCCTCTGGGTTGTAAACTTCTTTTCTTTGGGACGAAACCCCCGTTTCTACGGGGACTGACGGTACCAGAGGAATAAGCACCGGCTAACTCCGT
757	0	0	0	0	0	0	0	3	0	0.93	Root;Bacteria;Firmicutes;"Clostridia";Clostridiales;"Lachnospiraceae";Dorea	TGGGGAATATTGCACAATGGAGGAGACTCTGATGCAGCGACGCCGCGTGAAGGATGAAGTATTTCGGTATGTAAACTTCTATCAGCAGGGAAGAAAATGACGGTACCTGACTAAGAAGCCCCGGCTAACTACGT
758	0	0	0	0	0	0	1	0	0	0.88	Root;Bacteria;Proteobacteria	TTAGGAATCTTGCGCAATGGGCGAAAGCCTGACGCAGCCATGCCGCGTGAATGAAGAAGGCCTTCGGGTTGTAAAGCACTTTTGTTCGGGAAGAAGCTTCGTCGCTAATACCGATGGAGGATGACGGTACCGGAAGAATAAGCACCGGCTAACTACGT
759	0	0	0	0	0	0	1	0	0	1	Root;Bacteria	TGGGGAATATTGCACAATGGGCGCAAGCCTGATGCAGCCATGCCGCGTGTATGAAGAAGGCCTTCGGGTTGTAAACCGCTTTCGCCTGTGACGAAGCGTGAGTGACGGTAATGGGTAAAGAAGCACCGGCTAACTACGT
760	0	0	0	0	0	0	1	0	0	0.88	Root;Bacteria;Proteobacteria	TGGGGAATATTGGACAATGGGCGAAAGCCTGATCCAGCAATGCCGCGTGAGTGATGAAGGCCTTCGGGTTGTAAAGCTCTGTGGGGCGGGACGAAAAGACAGGTTCTAACAGGACCTGAAATTGACGGTACCGCCTTAGCAAGCACCGGCTAACTCTGT
761	0	0	0	0	0	0	0	0	2	0.99	Root;Bacteria;Firmicutes;"Clostridia";Clostridiales;"Lachnospiraceae"	TGGGGAATATTGCCCAATGGGGGAAACCCTGATGCAGCGACGCCGCGTGAAGGAAGAAGTATTTCGGTATGTAAACTTCTATCAGCAGGGAAGATAGTGACGGTACCTGAGTAAGAAGCTCCGGCTAACTACGT
762	0	0	0	0	4	19	0	0	0	0.99	Root;Bacteria;Bacteroidetes;Bacteroidetes;Bacteroidales;Prevotellaceae;Prevotella	TGAGGAATATTGGTCAATGGACGAGAGTCTGAACCAGCCAAGTAGCGTGCAGGATGACGGCCCTATGGGTTGTAAACTGCTTTTATGTGGGGATAAAGTGGGGGACGTGTCCCTTATTGCAGGTACCACATGAATAAGGACCGGCTAATTCCGT
763	0	0	0	0	0	0	1	0	0	0.99	Root;Bacteria;Proteobacteria	TGGGGAATCTTGGACAATGGGCGAAAGCCTGATCCAGCAATGCCGCGTGAGTGATGAAGGCCTTAGGGTTGTAAGGCACTTTAAGCGAGGAGGAGGCTCTCTTGGTTAATACCCAAGATGAGTGGACGTTACTCGCAGAATAAGCACCGGCTAACTCTGT
764	0	0	0	0	0	0	6	0	0	1	Root;Bacteria	TAGGGAATATTGGACAATGGGTGCGAGCCTGATCCAGCCATGCCGCGTGCAGGAAGACGGCCTTCTGGGTTGTAAACTGCTTTTGCCAGGGGATAAAAAGAGCGTGCGCGCTTTATTGAAGGTACCTGGTGAATAAGCCACGGCTAACTACGT
765	0	0	3	0	0	0	0	0	0	0.93	Root;Bacteria;Firmicutes;"Bacilli";Bacillales;Bacillaceae;"Bacillaceae 2";Lentibacillus	TAGGGAATCATCCGCAATGGACGAAAGTCTGACGGTGCAACGCCGCGTGAGTGATGAAGGTTTTCGGATCGTAAAACTCTGTTGTCGGGGAAGAACAAGTGCTGTTCGAACAGGGCGGCACCTTGACGGTACCTGACCAGAAAGCCCCGGCTAACTACGT
766	0	0	0	1	0	0	0	0	0	1	Root;Bacteria	TTAGGAATTTTGCGCAATGGGGGAAACCCTGACGCAGCAACGCCGCGTGAGTGATGAAGGCCTTCGGGTTGTAAAGCTCTTTTAGCAGGGGACGAACACAATGACGGTACCTGCAGAAAAAGCACCGGCTAACTCTGT
767	0	0	0	0	0	1	0	0	0	0.99	Root;Bacteria;Firmicutes;"Clostridia";Clostridiales	TGGGGAATATTGCACAATGGGCGAAAGCCTGATGCAGCAACGCCGCGTGAGCGATGAAGGCCTTCGGGTCGTAAAGCTCTGTCCTCAAGGAAGATAATGACGGTACCTAACAAGAAAGCACCGGCTAACTACGT
768	0	0	0	0	0	0	0	7	0	1	Root;Bacteria;Firmicutes;"Clostridia";Clostridiales;Veillonellaceae;Megasphaera	TGGGGAATCTTCCGCAATGGACGAAAGTCTGACGGAGCAACGCCGCGTGAACGATGACGGCCTTCGGGTTGTAAAGTTCTGTTATACGGGACGAATGGCGCAACGGTCAATACCCGTTGCGAGTGACGGTACCGTAAGAGAAAGCCACGGCTAACTACGT
769	0	0	0	0	0	1	0	0	0	1	Root;Bacteria	TTAGGAATCTTCCACAATGGGCGAAAGCCTGATGGAGCGACACCGCGTGAGGGATGAAGGCTTTCGGGTCGTAAACCTCTAAAAGGGGGACGAATGATGACGGTACCCCTTGAGAAGCACCGGCTAACTCCGT
770	0	0	0	0	0	0	33	0	0	0.89	Root;Bacteria;Proteobacteria;Betaproteobacteria;Methylophilales;Methylophilaceae	TGGGGAATTTTGGACAATGGGCGCAAGCCTGATCCAGCCATTCCGCGTGAGTGAAGAAGGCCTTCGGGTTGTAAAGCTCTTTCGCAAGGGAAGAAAACTTAGGCGCTAATATCGCTTGAGGTTGACGGTACCTTGATAAGAAGCACCGGCTAACTACGT
771	0	0	0	0	18	1	0	0	2	0.82	Root;Bacteria;Firmicutes;"Clostridia"	TGGGGAATCTTCCGCAATGGGCGAAAGCCTGACGGAGCAATGCCGCGTGAGTGATGAAGGAATTCGTTCCGTAAAGCTCTTTTGTTTATGACGAACGTGCGAGTTGTGAATAATGACTTGTAATGACGGTAGTAAACGAATAAGCCACGGCTAACTACGT
772	0	0	0	0	0	2	0	0	0	0.91	Root;Bacteria;Firmicutes;"Erysipelotrichi";"Erysipelotrichales";Erysipelotrichaceae;Turicibacter	TGGGGAATATTGCACAATGGGCGAAAGCCTGATGCAGCAACGCCGCGTGAGCGATGAAGGCCTTCGGGTCGTAAAATTCTGTTATAAGGGAAGAACGACTTTAGTAGGAAATGGCTAGAGTGTGACGGTACCTTATGAGAAAGCCACGGCTAACTACGT
773	0	0	0	0	0	1	0	0	0	0.8	Root;Bacteria;Proteobacteria;Epsilonproteobacteria	TGGGGAATATTGCACAATGGGGGAAACCCTGATGCAGCAACGCCGCGTGAGTGATGAAGGTTTTAGGATTGTAAACTCCCTTTGTAAGAGAAGATTATGACGGTATCTTACGAATAAGCACCGGCTAACTCCGT
774	0	0	0	0	0	2	0	0	0	0.96	Root;Bacteria;Bacteroidetes;Bacteroidetes;Bacteroidales	TGGGGAATATTGCACAATGGGCGAGGGTCTGAACCAGCCAAGTAGCGTGCAGGATGACGGCCCTATGGGTTGTAAACTGCTTTTATAAGGGAATAAAGTGAGTCTCGTGAGACTTTTTGCATGTACCTTATGAATAAGGATCGGCTAATTCCGT
775	0	0	0	0	1	0	0	0	0	0.8	Root;Bacteria;Actinobacteria;Actinobacteria;Coriobacteridae;Coriobacteriales;Coriobacterineae;Coriobacteriaceae	TGGGGAATTTTGCGCAATGGGGGCAACCCTGACGCAGCAACGCCGCGTGCGGGATGACGGCCTTCGGGTTGTAAACCGCTTTCAGCAGGGGAAGATTATGACGGTACCTGCAGAAGAAGCCCCGGCTAACTACGT
776	0	0	0	0	2	0	0	0	0	0.82	Root;Bacteria;Firmicutes;"Clostridia";Clostridiales	ACGTAGTTAGCCGTGGCTTATTCTAGAGGTACCGTCTTCTGCTCTTCCCTCTTAAAAGAAGTTTACAACCCGAAAGCCTTCTTCCTTCACGCGGCGTTGTTGGGTCAGGCTTGCGCCCATTGCCCAATATTCCCCA
777	0	0	0	0	38	0	88	0	0	1	Root;Bacteria;Firmicutes;"Bacilli";Bacillales;"Staphylococcaceae";Staphylococcus	TAGGGAATCTTCCGCAATGGGCGAAAGCCTGACGGAGCAACGCCGCGTGAGTGATGAAGGTCTTCGGATCGTAAAACTCTGTTATTAGGGAAGAACAAACGTGTAAGTAACTGTGCACGTCTTGACGGTACCTAATCAGAAAGCCACGGCTAACTACGT
778	0	0	0	0	0	0	0	0	3	1	Root;Bacteria	TGGGGAATATTGCGCAATGGGGGAAACCCTGACGCAGCAACACCGCGTGATTGAAGAAGGTCTTCGGATTGTAAAAATCTTTTATCAAGGACGAAGAAGTGACGGTACTTGATGAATAAGCTCCGGCTAACTACGT
779	0	0	0	0	0	0	0	0	1	0.97	Root;Bacteria	TGAGGAATATTGGACAATGGCCGGAAGGCTGATCCAGCCATGCCGCGTGCGGGAAGACGGCCCTATGGGTTGTAAACCGCTTTTGCGAGGGAGCAATAAGGGCAACGTGTTGTCCGATGAGAGTACCTCGCGAATAAGCATCGGCTAACTCCGT
780	0	0	1	8	0	1	147	0	0	0.99	Root;Bacteria;Proteobacteria;Gammaproteobacteria;Pseudomonadales;Pseudomonadaceae;Pseudomonas	TGGGGAATATTGGACAATGGGCGAAAGCCTGATCCAGCCATGCCGCGTGTGTGAAGAAGGTCTTCGGATTGTAAAGCACTTTAAGTTGGGAGGAAGGGCAGTAAGCTAATACCTTGCTGTTTTGACGTTACCGACAGAATAAGCACCGGCTAACTCTGT
781	0	0	0	0	0	0	0	0	1	0.9	Root;Bacteria;Firmicutes	ATAAGAAACTGTCTGGCTAGAGTGCAGGAGAGGCAAGCGGAATTCCAAGTGTAGCGGTGAAATGCGTAGATATTTGGAAGAACACCGGTGGCGAAGGCGGCTTGCTGGACTGTAACTGACGCTGAGTCACGAAAGCGTGGGGAGCGAACAGGATTAGATACCCTGGTAGTCCACGCCGTAAACGATGAGTGCTAGGTGTT
782	0	0	85	0	0	0	0	0	0	0.8	Root;Bacteria;Firmicutes;"Clostridia";Clostridiales;Clostridiaceae;"Clostridiaceae 1"	TGGGGAATATTGCGCAATGGGGGAAACCCTGACGCAGCAACGCCGCGTGAGTGATGAAGGTTTTCGGATCGTAAAACTCTGTCTTTAGGGGACGATAATGACGGTACCTAAGGAGGAAGCCACGGCTAACTACGT
783	0	0	0	0	0	2	0	0	0	0.81	Root;Bacteria;Actinobacteria;Actinobacteria;Coriobacteridae;Coriobacteriales;Coriobacterineae;Coriobacteriaceae	TGGGGAATATTGCGCAATGGGGGCAACCCTGACGCAGCAACGCCGCGTGCGGGACGAAGGCATTCGTGTCGTAAACCGCTTTCAGCAGGGAAGACGTCGACGGTACCTGCAGAAGAAGCCCCCGGCTAACTACGT
784	0	0	0	0	1	0	0	0	0	1	Root;Bacteria	TCGGGAATTTTGCCCAATGGACGAAAGTCTGAGGCAGCAACTCCGCGTGAGGGATGAAGGCCTTCGGGTCGTAAACCTCTTTTCTCAGGGAAGATACAAGACGGTACCTGAGGAATAAGCCACGGCTAACTACGT
785	0	0	0	0	0	1	0	0	0	0.87	Root;Bacteria;Actinobacteria;Actinobacteria;Coriobacteridae;Coriobacteriales;Coriobacterineae;Coriobacteriaceae	TGGGGAATCTTGCGCAATGGGCGAAAGCCTGACGCAGCGACGCCGCGTGCGGGAAGAAGGCCTTCGGGTTGTAAACCGCTTTCAGCAGGGGACGAGGCCGTAAGGTGACGGTACCTGCAGAAGAAGCCCCCGGCTAACTACGT
786	0	0	0	0	6	0	0	7	10	1	Root;Bacteria	TCGGGAATATTGCGCAATGGAGGAAACTCTGACGCAGTGACGCCGCGTATAGGAAGAAGGTTTTCGGATTGTAAACTATTGTCGTTAGGGAAGATACAAGACAGTACCTAAGGAGGAAGCTCCGGCTAACTACGT
787	0	0	0	0	0	0	2	0	0	0.8	Root;Bacteria;Cyanobacteria;Cyanobacteria;Chloroplast;Streptophyta	TGGGGAATTTTGGACAATGGGGGCAACCCTGATCCAGCAATGCCGCGTGGAGGTAGAAGGCCCACGGGTCGTGAACTTCTTTTCCCGGAGAAGAAGCAATGACGGTATCTGAGGAATAAGCATCGGCTAACTCTGT
788	0	0	0	0	0	0	0	0	1	0.91	Root;Bacteria;Bacteroidetes;Bacteroidetes;Bacteroidales;Prevotellaceae	TGAGGAATATTGGTCAATGGGCGCGAGCCTGAACCAGCCAAGTAGCGTGCAGGAAGACTGCCCTATGGGTTGTAAACTGCTTTTATAGGGGAATAAAGTGTGGTACGTGTACCGTTTTGTATGTACCCTATGAATAAGGACCGGCTAATTCCGT
789	0	0	0	0	0	0	5	0	0	0.97	Root;Bacteria;Bacteroidetes;Bacteroidetes;Bacteroidales;Porphyromonadaceae;Porphyromonas	TGAGGAATATTGGTCAATGGGCGAGAGCCTGAACCAGCCAAGTCGCGTGAAGGATGACTGTCTTATGGATTGTAAAACTTCTTTTGTAGGGGAATAAAGAACGGTACGTGTACCGTAGTGAATGTACCCTACGAATAAGCATCGGCTAACTCCGT
790	0	0	0	0	0	0	0	0	3	1	Root;Bacteria	TGGGGAATATTGGGCAATGGGCGCAAGCCTGACCCAGCAACGCCGCGTGAAGGAAGAAGGCTTTCGGGTTGTAAACTTCTTTTATTAGGGACGATAATGACGGTACCTATTGAATAAGCTCCGGCTAACTACGT
791	0	0	0	0	0	0	0	3	0	0.87	Root;Bacteria;Firmicutes;"Clostridia";Clostridiales;"Ruminococcaceae"	TGGGGGATATTGCACAATGGGGGAAACCCTGATGCAGCGACGCCGCGTGAGGGAAGACGGCCTTCGGGTTGTAAACCTCTGTCTTCGGGGACGAATAAATGACGGTACCCGAGGAGGAAGCCACGGCTAACTACGT
792	0	0	0	0	0	0	1	0	0	1	Root;Bacteria;Cyanobacteria;Cyanobacteria;Chloroplast;Streptophyta	TGGGGAATTTCCGCAATGGGCGAAAGCCTGACGGAGCAATGCCGCGTGAAGGCAGAAGGCCCACGGGTCGTGAACTTCTTTTCTCGGAGAAGAAGCAATGACGGTATCTGAGGAATAAGCATCGGCTAACTCTGT
793	0	0	0	0	0	1	0	0	0	1	Root;Bacteria;Firmicutes;"Erysipelotrichi";"Erysipelotrichales";Erysipelotrichaceae;Turicibacter	TAGGGAATCTTCGGCAATGGGCGAAAGCCTGACCGAGCAACGCCGCGTGAATGATGAAGGCCTTCGGGTTGTAAAATTCTGTTATAAGGGAAGAACGACTTTAGTAGGAAATGGCTAGAGTGTGACGGTACTTGAGGAGGAAGCCCCGGCTAACTACGT
794	0	0	2	2	0	0	0	0	0	0.98	Root;Bacteria;Firmicutes;"Bacilli";Bacillales;Bacillaceae	TAGGGAATCTTCCGCAATGGACGCAAGTCTGACGGAGCGACGCCGCGTGAGTGATGAAGGTCTTCGGATCGTAAAACTCTGTTGTCAGGGAGAACAAGTGCCGTTCGAATAGGCGGTACCCTTGACGGTACCTAACCAGAAAGCCCCGGCTAACTACGT
795	0	0	0	0	0	5	0	0	0	1	Root;Bacteria	TGGGGAATATTGCACAATGGGGGAAACCCTGATGCAGCGACGCCGCGTGGAGGAAGAAGGCCTTCGGGTTGTAAACTCCTGTCGTAAGGGACGATAGTGACGGTACCTTACAAGAAAGCCACGGCTAACTACGT
796	0	0	0	0	0	1	0	0	0	0.99	Root;Bacteria;Firmicutes;"Clostridia";Clostridiales	TGGGGAATATTGCACAATGGGCGAAAGCCTGATGCAGCAACGCCGCGTGAGCGATGAAGGCCTTCGGGTCGTAAACTTCTATCAGCAGGGAAGAAAATGACGGTACCTGACTAAGAAGCCCCGGCTAACTACGT
797	0	0	4	0	0	0	0	0	0	0.95	Root;Bacteria;Firmicutes;"Bacilli";Bacillales;Bacillaceae	TAGGGAATCTTCCGCAATGGACGCAAGTCTGACGGAGCAATGCCGCGTGAGTGATGAAGGTTTTCGGATTGTAAAACTCTGTTGTTAGGGAAGAACAAGTACTGTTCAAATAGGGCGGTACCTTGACGGTACCTAACCAGAAAGCCCCGGCTAACTACGT
798	0	0	0	0	17	19	0	89	29	1	Root;Bacteria;Firmicutes;"Erysipelotrichi";"Erysipelotrichales";Erysipelotrichaceae;Erysipelotrichaceae Incertae Sedis	TAGGGAATTTTCGTCAATGGGGGGAACCCTGAACGAGCAATGCCGCGTGAGTGAGGAAGGTCTTCGGATCGTAAAGCTCTGTTGTAAGAGAAAAACGGCACTCATAGGGAATGATGAGTGAGTGATGGTATCTTACCAGAAAGTCACGGCTAACTACGT
799	0	0	0	0	0	0	2	0	0	1	Root	GCGCGCAAATTACCCAATCCCAACACGGGGAGGTAGTGACAATATGTAACAATATACGGCCTTATACGTCGTATAATTGGAATGAGTACAATTTAAATCCCTTAACGAGGAACAATTGGAGGGCAAGTCTGGT
800	0	0	0	1	0	0	0	0	0	0.9	Root;Bacteria;Firmicutes;"Bacilli";Bacillales;Bacillaceae	TAGGGAATCTTCCGCAATGGACGAAAGTCTGACGGAGCGACGCCGCGTGAGTGATGAAGGTCTTCGGATCGTAAAACTCTGTTGTTAGGGAAGAACAAGTACTGGCCTAATACGCCCGTACCTTGACGGTACCTAACCAGAAAGCCCCGGCTAACTACGT
801	0	0	0	0	11	24	0	0	17	0.95	Root;Bacteria;Bacteroidetes;Bacteroidetes;Bacteroidales;Prevotellaceae;Prevotella	TGAGGAATATTGGTCAATGGGCGAGAGCCTGAACCAGCCAAGTAGCGTGCAGGATGACGGCCCTATGGGTTGTAAACTGCTTTTATAAGGGAATAAAGTGGGCCTCGTGAGGCTTTTTGCATGTACCTTATGAATAAGGACCGGCTAATTCCGT
802	0	0	0	0	2	1	0	6	0	1	Root;Bacteria	TGGGGAATATTGCGCAATGGGGGAAACCCTGACGCAGCAACGCCGCGTGATTGAAGAAGGCCTTCGGGTTGTAAAGATCTTTAATCAGGGACGAAATAAATGACGGTACCTGAAGAATAAGCTCCGGCTAACTACGT
803	0	0	0	0	0	0	0	0	1	0.89	Root;Bacteria;Bacteroidetes;Bacteroidetes;Bacteroidales;Prevotellaceae	TGAGGAATATTGGTCAATGGGCGAGAGCCTGAACCAGCCAAGTAGCGTGCAGGATGACGGCCCTACGGGTTGTAAACTGCTTTTGCTGGAGAATAAAACGCCCCACGGGTGGGGCCTTGCATGTATCCAGTGAATAAGGACCGGCTAATTCCGT
804	0	0	0	0	0	0	0	0	1	0.97	Root;Bacteria;Firmicutes;"Clostridia";Clostridiales;"Lachnospiraceae"	GGGGGAATATTGCACAATGGGGGAAACCTCTGATGCAGCGACCCCGCGTGAGTGAGGAAGTATTTCGGTATGTCACGCTCTATCAGCGGGGAAGAAAATGACGGTACCTGAGTAAGAAGCCCCGGCTAACTACGT
805	0	0	0	0	0	0	0	0	2	1	Root;Bacteria	TGGGGAATATTGGGCAATGGGCGAAAGCCTGACCCAGCAACGCCGCGTGAAGGAAGAAGGTTTTCGGATTGTAAACTTCTGTCCTATGTGAAGAGTGGTAGACGGTAGCATAGGAGGAAGCCCCGGCTAACTACGT
806	0	0	0	0	74	0	0	2	17	0.81	Root;Bacteria;Firmicutes;"Clostridia";Clostridiales;"Ruminococcaceae";Fastidiosipila	TGGGGAATATTGGGCAATGGGCGCAAGCCTGACCCAGCAACGCCGCGTGAAGGAAGAAGGCTTTCGGGTTGTAAACTTCTTTTAAGAGGGAAGAGCAGAAGACGGTACCTCTAGAATAAGCCACGGCTAACTACGT
807	0	0	0	0	116	84	0	147	2	1	Root;Bacteria;Firmicutes;"Clostridia";Clostridiales;"Lachnospiraceae"	TGGGGAATATTGCACAATGGGCGAAAGCCTGATGCAGCGACGCCGCGTGAGCGAAGAAGTATTTCGGTATGTAAAGCTCTATCAGCAGGGAAGATAATGACGGTACCTGACTAAGAAGCACCGGCTAAATACGT
808	0	0	0	0	0	0	0	0	2	0.86	Root;Bacteria;Firmicutes;"Clostridia";Clostridiales;"Ruminococcaceae"	TGGGGAATATTGGGCAATGGGCGCAAGCCTGACCCAGCAACGCCGCGTGAAGGAAGACGGTTTTCGGATTGTAAACTTCTTTTAAGAGGGACGATAATGACGGTACCTCTTGAATAAGCCACGGCTAACTACGT
809	0	0	1	0	3	9	0	0	61	0.93	Root;Bacteria;Firmicutes;"Clostridia";Clostridiales;Clostridiaceae;"Clostridiaceae 1";Sarcina	TGGGGAATATTGCACAATGGGGGAAACCCTGATGCAGCAACGCCGCGTGAGTGATGAAGGTCTTCGGATTGTAAAGCTCTGTCTTTAGGGACGATAATGACGGTACCTAAGGAGGAAGCCACGGCTAACTACGT
810	0	0	0	0	56	0	0	31	0	0.94	Root;Bacteria;Firmicutes;"Clostridia";Clostridiales	TGGGGAATATTGCACAATGGGGGAAACCCTGATGCAGCAACGCCGCGTGAAGGAAGACGGTTTTCGGATTGTAAACTTCTGTTCTTAGTGAAGAATAATGACGGTAGCTAAGGAGCAAGCCACGGCTAACTACGT
811	0	0	0	0	0	0	0	3	1	1	Root;Bacteria	TAGGGAATATTGGGCAATGGGCGCAAGCCTGACCCAGCAACGCCGCGTGAGGGAAGAAGGTTTTCGGATTGTAAACCTCTGTCCTATGTGACGAAGGAAGTGACGGTAGCATAGGAGGAAGCCCCGGCTAACTACGT
812	0	0	0	0	0	0	0	20	5	0.83	Root;Bacteria;Firmicutes;"Clostridia";Clostridiales	TGGGGAATATTGGGCAATGGGCGAAAGCCTGACCCAGCAACGCCGCGTGAGGGAAGAAGGTTTTCGGATTGTAAACCTCTGTCCTAAGGGACGAAGGAAGTGACGGTACCTTAGGAGGAAGCCCCGGCTAACTACGT
813	0	0	0	0	0	0	0	4	2	0.85	Root;Bacteria;Firmicutes;"Clostridia";Clostridiales;"Ruminococcaceae"	TGGGGGATATTGCACAATGGGGGAAACCCTGATGCAGCGACGCCGCGTGAGGGAAGACGGTCCTCTGGATTGTAAACCTCTGTCTTCGGGGACGAAACGAGACGGTACCCGAGGAGGAAGCCACGGCTAACTACGT
814	0	0	0	0	0	0	1	0	0	1	Root;Bacteria	TAGGGAATATTGCGCAATGGACGAAAGTCTGACGCAGCCACGCCGCGTGAGTGAGGAAGGCCTTCGGGTTGTAAAGCTCTGTCATCCGGAAAACGGCTATTGCTTAATAGGTAATATCTGTGACGTTACTCGCAGAAGAAGCACCGGCTAACTCCGT
815	0	0	0	0	0	0	1	0	0	0.83	Root;Bacteria;Proteobacteria;Betaproteobacteria	TGGGGAATATTGGACAATGGGCGCAAGCCTGATCCAGCCATACCGCGTGGGTGAAGAAGGCCTTCGGGTTGTAAACCGCTTTTGTCAGGGGAAGAAATCCTTTGGGCTAATAACTCGGAGGGATGACGGTACCTGAAGAATAAGCACCGGCTAACTACGT
816	0	0	0	0	4	0	0	2	2	0.95	Root;Bacteria;Firmicutes;"Clostridia";Clostridiales	TGGGGAATATTGCACAATGGGGGAAACCCTGATGCAGCAACGCCGCGTGAAGGAAGACGGTCTTCGGATTGTAAACTTTTGTTCTTGGTGAAGAAGAATGACGGTAGCCAAGGAGGAAGCCACGGCTAACTACGT
817	0	0	0	0	0	0	0	0	17	0.92	Root;Bacteria;Bacteroidetes	TGAGGAATATTGGTCAATGGCCGAGAGGCTGAACCAGCCAAGTCGCGTGAGGGATGACGGTCCTATGGATTGTAAACCTCTTTTGTCGGGGAGCAAAGGACGCCACGTGTGGTGTTTTGCGAGTACCCGAAGAAAAAGCATCGGCTAACTCCGT
818	0	0	0	0	0	0	0	0	45	1	Root;Bacteria;Verrucomicrobia;Verrucomicrobiae;Verrucomicrobiales;Verrucomicrobiaceae;Akkermansia	TCGAGAATCATTCACAATGGGGGAAACCCTGATGGTGCGACGCCGCGTGGGGGAATGAAGGTCTTCGGATTGTAAACCCCTGTCATGTGGGAGCAAATTAAAAAGATAGTACCACAAGAGGAAGAGACGGCTAACTCTGT
819	0	0	0	0	0	0	0	0	1	0.96	Root;Bacteria;Bacteroidetes;Bacteroidetes;Bacteroidales;Prevotellaceae	AGAGGAATATTGGTCAATGGCCGCTAGGCTGAACCAGCCAAGTACCGTGCAGGATGACGGCCCTATGGGTTGTAAACTGCTTTTATGCCGGGATAAAGTGACGTAGCGTGTGCATTTTTGCAGGTACCGCATGAATAAGCACCGGCTAATTCCGT
820	0	0	0	0	0	0	1	0	0	0.86	Root;Bacteria;Proteobacteria;Betaproteobacteria;Burkholderiales	TGGGGAATATTGCACAATGGGCGCAAGCCTGATGCAGCCATGCCGCGTGTATGAAGAAGGCCTTCGGGTTGTAAACCGCTTTTGTCAGGGAGAAAAGGTTCTGGCTAATACCTGGGACTCATGACGGTACCTGAAGAATAAGCACCGGCTAACTACGT
821	0	0	0	0	0	0	0	0	6	0.97	Root;Bacteria;Firmicutes;"Clostridia";Clostridiales;"Lachnospiraceae"	TGGGGAATATTGCACAATGGGGGAAACCCTGATGCAGCAACGCCGCGTGAGTGAAGAAGTATTTCGATATGTAAAGCTCTATCAGCAGGGAAGAAGATGACGGCACCTGAGTAAGAAGCCCCAGCTAACTACGT
822	0	0	0	0	0	0	0	0	1	0.99	Root;Bacteria;Bacteroidetes;Bacteroidetes;Bacteroidales	TGAGGAATATTGGTCAATGGGCGAGAGCCTGAACCAGCCAAGTAGCGTGAAGGAAGACTGCCCTATGGGTTGTAAACTTCTTTTGTATGGGAATAAAGTCCACTACGTGTAGTGGTTTGTATGTACCTTACGAATAAGCATCGGCTAATTCCGT
823	0	0	0	0	0	0	3	0	0	0.82	Root;Bacteria;Firmicutes;"Clostridia";Clostridiales;"Peptostreptococcaceae"	TGGGGAATATTGCACAATGGGGGAAACCCTGATGCAGCAACGCCGCGTGAGCGATGAAGGCCTTCGGGTCGTAAAGCTCTGTCCTAAGGGAAGATAATGACGGTACCTTAGGAGGAAGCCCCGGCTAACTACGT
824	0	0	0	3	0	0	0	0	0	1	Root;Bacteria;Proteobacteria;Gammaproteobacteria;Pseudomonadales;Moraxellaceae;Acinetobacter	TGGGGAATATTGGACAATGGGGGGAACCCTGATCCAGCCATGCCGCGTGTGTGAAGAAGGCCTTATGGTTGTAAAGCACTTTAAGCGAGGAGGAGGCTACTAGTATTAATACTACTGGATAGTGGACGTTACTCGCAGAATAAGCACCGGCTAACTCTGT
825	0	0	0	0	0	1	0	0	0	1	Root;Bacteria	TAGGGAATCTTCCACAATGGAGGAAACTCTGATGCAGCCATGCCGCGTGTGTGAAGAAGGCCTTCGGATCGTAAAAGCTCTGTTGTAAGAGAAGAACGTGTGTGAGAGTGGAAAGTTCACACAGTGACGGTAACTTACCAGAAAGGGACGGCTAACTACGT
826	0	0	0	0	1	0	0	0	0	0.86	Root;Bacteria;Bacteroidetes;Bacteroidetes;Bacteroidales;Prevotellaceae	TGAGGAATATTGGTCAATGGATGAAAATCTGAACCAGCCAAGTAGCGTGCAGGATGACGGCCCTATGGGTTGTAAACTGCTTTTATGTGAGAATAAAGTTAGGTATGTATACTTATTTGCATGTATCACATGAATAAGGACCGGCTAATTCCGT
827	0	0	0	0	1	0	0	0	0	1	Root;Bacteria	TGGGGAATCTTGCGCAATGGGCGGAAGCCTGACGCAGCAACGCCGCGTGGGGGAAGAAGGCCTTCGGGTTGTAAACCTCTTTCAGTGGGGACGAAGCCTCTCGTTGTAGGGGGGTGACGGTACCTGCATAAGAAGCACCGGCTAACTACGT
828	0	0	0	0	0	0	10	0	0	0.97	Root;Bacteria;Proteobacteria;Betaproteobacteria;Methylophilales;Methylophilaceae;Methylophilus	TGGGGAATTTTGGACAATGGGCGCAAGCCTGATCCAGCCATTCCGCGTGAGTGAAGAAGGCCTTCGGGTTGTAAAGCTCTTTCGCAAGGGAAGAAAACTTACTTAATAATACTAGGTGAGGCTGACGGTACCTTGATAAGAAGCACCGGCTAACTACGT
829	0	0	0	0	0	2	0	0	0	0.86	Root;Bacteria;Bacteroidetes;Bacteroidetes;Bacteroidales;Prevotellaceae;Hallella	TGAGGAATATTGGTCAATGGCCGAGAGGCTGAACCAGCCAAGTAGCGTGCAGGATGACGGCCCTATGGGTTGTAAACTGCTTTTATACGGGGATAAAGTTCTCTACGTGTAGAGTTTTGCAGGTACCGTATGAATAAGGACCGGCTAATTCCGT
830	0	0	0	0	0	1	0	0	13	0.88	Root;Bacteria;Bacteroidetes	TGAGGAATATTGGTCAATGGGCGCAGGCCTGAACCAGCCAAGTCGCGTGAGGGAAGACGGTCCTACGGATTGTAAACCTCTTTTGTCGGGGAGTAACGTGCGGGACGCGTCCCGTATTGAGAGTACCCGAAGAAAAAGCATCGGCTAACTCCGT
831	0	0	0	0	0	0	1	0	0	0.98	Root;Bacteria;Proteobacteria;Gammaproteobacteria	TGGGGAAGTATTGGACAATGGGGGCGAACCCTCGATCCAGCGATGCCGCGTGTGTGAAGAAGGCCTGAGGGTTGTAAAGCACTTTCAGTGGGGAGGAGAGTTTGCGGGTTAAGAGCTTGCTGACGAGACGTTACCCACAGAAGAAGCACCGGCTAACTCCGT
832	0	0	0	0	0	0	0	0	1	1	Root;Bacteria	TTAGGAATATTCGTCAATGGAGGAAACTCTGAACGAGCAATGCCGCGTGAGTGATGAAGGTCTCATAGATTGTAAAACTCTGTTGTATGGAAAAAATGACTAGGTTAGGAAATGAACTTAGTGTGATGGTACCATACCAGAAAGCCCCGGCTAACTACGT
833	0	0	0	0	0	0	0	0	1	0.92	Root;Bacteria;Tenericutes;Mollicutes;Anaeroplasmatales;Anaeroplasmataceae;Anaeroplasma	TAGGGAATTTTCGGCAATGGACGAAAGTCTGACCGAGCAACGCCGCGTGAACGAAGAAGTATTTCGGTATGTAAAGTTCTTTTATCAGGGACGAAAAAACAAATTGACTGTACCTGATGAATAAGCTCCGGCTAACTACGT
834	0	0	0	0	0	0	1	0	0	1	Root;Bacteria;Proteobacteria;Gammaproteobacteria;Enterobacteriales;Enterobacteriaceae	CGGGGAATATTGCACAATGGGCGCAAGCCTGATGCAGCCATGCCGCGTGTATGAAGAAGGCCTTCGGGTTGTAAAGTACTTTCAGCGGGGAGGAAGGGAGTAAAGTTAATAACCTTAGTGATTGACGTTACTCGCAGAAGAAGCACCGGCTAACTCCGT
835	0	0	0	0	0	0	1	0	0	0.85	Root;Bacteria;Proteobacteria;Gammaproteobacteria;Enterobacteriales;Enterobacteriaceae	TGGGGAATATTGGACAATGGGGGAAACCCTGATCCAGCCATGCCGCGTGTGTGAAGAAGGCCTTTTGGTTGTAAAGTACTTTCAGCGGGGAGGAAGGGAGTAAAGTTAATACCTTTGCTCATTGACGTTACCCGCAGAAGAAGCACCGGCTAACTCCGT
836	0	0	0	0	0	0	0	1	0	1	Root;Bacteria	TGGGGGATATTGCGCAATGGGGGAAACCCTGACGCAGCAACGCCGCGTGAAGGAAGAAGGCCTTCGGGTTGTAAACTTTTGTCTTTTGGGAAGAAGAATGACGGTACCAAAGGAGGAAGCCACGGCTAACTACGT
837	0	0	0	0	0	0	0	3	0	1	Root;Bacteria	TAGGGAATATTGGACAATGGGGGAAACCCTGATCCAGCAACGCCGCGTGAAGGAAGAAGGTCTTCGGATTGTAAACTTATGTTGTCGGGGACGAAGAAAGACGGTACCCGACGAGGAAGCCCCGGCTAACTACGT
838	0	0	0	0	1	1	0	0	0	0.88	Root;Bacteria;Firmicutes;"Clostridia";Clostridiales;"Lachnospiraceae"	TGGGGAATATTGCACAATGGGCGAAAGCCTGATGCAGCAACGCCGCGTGAGCGATGAAGGCCTTCGGTATGTAAAGCTCTATCAGCAGGGAAGAAAATGACGGTACCTGACTAAGAAGCCCCGGCTAACTACGT
839	0	0	0	0	0	0	0	3	1	1	Root;Bacteria	TCGGGAATATTGCGCAATGGAGGAAACTCTGACGCAGTGACGCCGCGTATAGGAAGAAGGTTTTCGGATTGTAAACTATTTTAGTCAGGGAAGAAAAATGACAGTACCTGAAGAATAAGCTCCGGCTAACTACGT
840	0	0	0	0	0	0	0	0	1	0.88	Root;Bacteria;Spirochaetes;Spirochaetes;Spirochaetales;Spirochaetaceae;Treponema	CTAAGAATATTCCGCAATGGGGGGAACCCTGACGGAGCGACGCCGCGTGGACGATGAAGGCCGGAAGGTTGTAAAGTCCTTTTGTCAGTGAGGAATAAAACGGGGAGGGAATGCCCCGGAGATGACTGTAGCTGACGAATAAGCACCGGCTAATTACGT
841	0	0	0	0	0	0	2	0	0	0.81	Root;Bacteria;Proteobacteria;Gammaproteobacteria;Enterobacteriales;Enterobacteriaceae	TGGGGAATATTGCACAATGGGCGCAAGCCTGATGCAGCCATGCCGCGTGTATGAAGAAGGCCTTCGGGTTGTAAAGTACTTTCAGCGGGGAGGAAGGGAGAGTGACGGTACCTGCAGAAGAAGCACCGGCCAACTACGT
842	0	0	0	0	0	0	0	0	1	1	Root;Bacteria	TGGGGGATATTGCGCAATGGGGGAAACCCTGACGCAGCAACGCCGCGTGAAGGATGAAGGCCCTTGGGTCGTAAACTTCTGTTCTAAGGGAAGATAATGACGGTACCTTAGGAGCAAGTCCCGGCTAACTACGT
843	0	0	0	0	0	0	18	0	0	0.83	Root;Bacteria;Bacteroidetes;Sphingobacteria;Sphingobacteriales;Flexibacteraceae	TAGGGAATATTGGGCAATGGGCGGAAGCCTGACCCAGCCATGCCGCGTGCAGGATGAAGGCCTTCTGGGTTGTAAACTGCTTTTATCAGGGAAGAAAACACCCATGCGTGGGGAACTGACGGTACCTGAGGAATAAGCACCGGCTAACTCCGT
844	0	0	0	0	0	0	30	0	0	0.94	Root;Bacteria;Proteobacteria;Betaproteobacteria;Burkholderiales	TGGGGAATTTTGGACAATGGGGGCAACCCTGATCCAGCAATGCCGCGTGAGTGAAGAAGGCCCTCGGGTTGTAAAGCTCTTTTGTCAGGGGAAGAAAAGGTATCTCCTAATACGGGGTACTGATGACGGTACCTGAAGAATAAGCACCGGCTAACTACGT
845	0	0	0	0	0	1	0	0	0	0.85	Root;Bacteria;Firmicutes;"Clostridia";Clostridiales;Clostridiaceae;"Clostridiaceae 1";Anaerobacter	TGGGGAAGTATTGCACAATGGGCGGAAAGCCTGATGCAGCAACGCCGCGTGAGTGATGACGGCCTTCGGTTGTAAAGCTCTGTCTTCAGGGACGATAATGGCGGTACCTGAGGAGGAAGCCACGGCTAACTACGT
846	0	0	0	0	0	0	48	0	0	0.9	Root;Bacteria;Proteobacteria;Deltaproteobacteria;Myxococcales;Sorangineae;Polyangiaceae	TGGGGAATCTTGCGCAATGGGCGAAAGCCTGACGCAGCGACGCCGCGTGAGTGATGAAGGCCTTCGGGTTGTAAAGCTCTGTGGGGCGAGACGAATAAGTTCCGGCTAATACCCGGAGCGATGACGGTATCGCCTTAGCAAGCACCGGCTAACTCTGT
847	0	0	1479	6379	0	0	0	0	0	0.98	Root;Bacteria;Firmicutes;"Bacilli";Bacillales;Bacillaceae	TAGGGAATCTTCCGCAATGGACGCAAGTCTGACGGAGCGACGCCGCGTGAGTGATGAAGGTCTTCGGATCGTAAAACTCTGTTGTCAGGGAAGAACAAGTGCCGTTCGAATAGGGCGGTACCTTGACGGTACCTAACCAGAAAGCCCCGGCTAACTACGT
848	0	0	0	0	0	0	2	0	0	0.86	Root;Bacteria;Proteobacteria;Betaproteobacteria;Burkholderiales;Comamonadaceae	TGGGGAATTTTGGACAATGGGGGCAACCCTGATCCAGCCATGCCGCGTGCAGGATGAAGGCCTTCGGGTTGTAAACTGCTTTTGTACGGAACGAAACGGCCTTTTCTAATAACTCGGAGGGATGACGGTACCTGAAGAATAAGCACCGGCTAACTACGT
849	0	0	0	0	0	0	1	0	0	0.82	Root;Bacteria;Proteobacteria	TGGGGAATTTTCCGCAATGGGCGAAAGCCTGACGGAGCAATGCCGCGTGTGAAGAAGGCCTTCGGGTTGTAAAGCACTTTTGTCCGGAAAGAAAGCGCTCTGGTTAATACCTGGGGCGGATGACGTACCGGAAGAATAAGCACCGGCTAACTACGT
850	0	0	0	0	0	0	0	0	1	0.98	Root;Bacteria;Actinobacteria;Actinobacteria;Coriobacteridae;Coriobacteriales;Coriobacterineae;Coriobacteriaceae	TGGGGAATTTTGCGCAATGGGGGAAACCCTGACGCAGCAACGCCGCGTGCGGGACGAAGGCCCTCGGGTTGTAAACCGCTTTCAGCAGGGAAGATCCAAGACGGTACCTGCAGAAGAAGCTCCGGCTAACTACGT
851	0	0	0	0	0	0	0	0	1	1	Root;Bacteria	TCGGGAATATTGCACAATGGAGGAAACTCTGATGCAGTGACGCCACGTACAGGAAGAAGGTCTTTGGATTGTAAACTGTTGTCGACAGGGAAGAAAAATGACAGTACCTGTGGAGGAAGCTCCGGCAAACTACGT
852	0	0	0	0	0	0	0	0	1	0.82	Root;Bacteria;Firmicutes;"Clostridia";Clostridiales	CATTGGGGAATATGTGCTCAATGGTGGGAAACCCTGATGCAGCGACTCCACGTGAGTGATGAAGGTCTTCGGATTGTGAAGCTCTGTCTTTAGGGACGATAATGACGGTACCTAACGAGGAAGCCACGGCTAAACTACGT
853	0	0	0	0	0	2	0	0	0	1	Root;Bacteria;Actinobacteria;Actinobacteria;Actinobacteridae;Actinomycetales	TGGGGAATGTTGCACAATGGGCGGAAGCCTGATGCAGCGACGCCGCGTGAGGGATGACGGCCTTCGGGTTGTAAACCTCTTTCAGTAGGGAAGAAGCGAGAGTGACGGTACCTGCAGAAGAAGCGCCGGCTAACTACGT
854	0	0	0	2	0	0	3	1	0	0.81	Root;Bacteria;Proteobacteria;Alphaproteobacteria;Rhizobiales;Methylobacteriaceae;Methylobacterium	TGGGGAATATTGGACAATGGGCGCAAGCCTGATCCAGCCATGCCGCGTGAGTGATGAAGGCCTTAGGGTTGTAAAGCTCTTTTATCCGGGACGATAATGACGGTACCGGAGGAATAAGCCCCCGGCTAACTTCGT
855	0	0	0	0	0	0	1	0	0	1	Root	GCATGCAAATTACCTACTTCCGACCCGAAGAGGTAGTGACGAAAAATAACAATACAGGACTCTTTTGAGGTCCTGTAATTGGAATGAGTCCACTTTAAAATCCTTTAATGAGGATCCATTGGAGGGCAAATCTAGT
856	0	0	0	0	0	0	0	0	2	0.94	Root;Bacteria;Bacteroidetes	TGAGGAATATTGGTCAATGGGCGAGAGCCTGAACCAGCCAAGTCGCGTGAGGGAGTACTGCCCTATGGGTTGTAAACCTCTTTTGTCGGGGAGCAAAAGCCGGACGTGTCCGGCTGTGAGAGTACCCGAAGAAAAAGCATCGGCTAACTCCGT
857	0	0	0	0	0	0	0	0	1	1	Root;Bacteria	TGGGGAATATTGGGCAATGGGGGGAACCCTGACCCAGCAACGCCGCGTGAGGGAAGAAGGTTTTCGGATCGTAAACCTCTGTCCTTGGTGAAGAGGAAGAGACGGTAGCCAAGGAGGAAGCCCCGGCTAACTACGT
858	0	0	0	0	0	2	0	0	0	0.91	Root;Bacteria;Bacteroidetes;Bacteroidetes;Bacteroidales;Prevotellaceae;Prevotella	TGAGGAATATTGGTCAATGGGCGAGAGCCTGAACCAGCCAAGTAGCGTGCAGGATGACGGCCCTATGGGTTGTAAACTGCTTTTATAAGGGAATAAAGTTGGAGTCGTGACTCTATTTGCATGTACCTTATGAATAAGGACCGGCTAACTACGT
859	0	0	0	0	0	0	0	0	3	0.99	Root;Bacteria;Actinobacteria;Actinobacteria	TGGGGAATTTTGCGCAATGGGGGAAACCCTGACGCAGCAACGCCGCGTGCGGGATGACGGCCTTCGGGTTGTAAACCGCTTTCAGAAGGGAAGAATTTAGACGGTACCTTCAGAAGAAGCTCCGGCTAACTACGT
860	0	0	0	0	0	0	0	0	1	0.95	Root;Bacteria;Bacteroidetes;Bacteroidetes;Bacteroidales	TGAGGAATATTGGTCAATGGGCGAGAGCCTGAACCAGCCAAGTAGCGTGAGGGAAGACGGCCCTATGGGTTGTAAACCTCTTTTGTTCGGGAATAAAGGGAGGCACGTGTGCCTCTTTGCATGTACCGTTCGAATAAGCATCGGCTAATTCCGT
861	0	0	0	0	0	0	0	0	6	0.82	Root;Bacteria;Firmicutes	TGGGGAATATTGGGCAATGGGCGCAAGCCTGACCCAGCAACGCCGCGTGAGGGAAGAAGGTTTTCGGATTGTAAACCTCTGTCCTTGGTGACGAAGGAAGTGACGGTAGCCAAGGAGGAAGCCCCGGCTAACTACGT
862	0	0	0	0	0	0	1	0	0	0.96	Root;Bacteria;Proteobacteria;Gammaproteobacteria;Enterobacteriales;Enterobacteriaceae;Shigella	TGGGGAATTTTGGACAATGGACGCAAGTCTGATCCAGCCATGCCGCGTGTATGAAGAAGGCCTTCGGGTTGTAAAGTACTTTCAGCGGGGAGGAAGGGAGTAAAGTTAATACCTTTGCTCATTGACGTTACCCGCAGAAGAAGCACCGGCTAACTCCGT
863	0	0	0	0	1	0	0	0	0	0.97	Root;Bacteria;Firmicutes;"Clostridia";Clostridiales;"Lachnospiraceae"	TGGGGATATTGCACAATGGAGGAAACTCTGATGCAGCGACGCCGCGTGAGTGAAGAAGTATTTCGGTATGTAAAGTTCTATCAGCAGGGAGGATAATGACAGTACCTGATTAAGAAGCCCCGGCTAACTACGT
864	0	0	0	0	2	0	0	5	0	1	Root;Bacteria;Firmicutes;"Clostridia";Clostridiales;"Lachnospiraceae"	TAGGGAATATTGCACAATGGGGGAAACCCTGATGCAGCGACGCCGCGTGAAGGAAGAAGTATTTCGGTATGTAAACTTCTATCAGCAAGGAAGAAAATGACGGTACTTGACTAAGAAGCCCCGGCTAAATACGT
865	0	0	0	0	2	0	0	0	0	1	Root;Bacteria;Bacteroidetes;Flavobacteria;Flavobacteriales;Flavobacteriaceae	TGAGGAATATTGGACAATGGGTGCAAGCCTGATCCAGCCATCCCGCGTGAAGGAATAAGGACCTATGGTTTGTAAACTTCTTTTGTACAGGGATAAACCTAGATACGAGTATCTAGCTGAAGGTACTGTACGAATAAGCACCGGCTAACTCCGT
866	0	0	0	0	0	13	0	0	0	0.9	Root;Bacteria;Actinobacteria;Actinobacteria;Actinobacteridae;Bifidobacteriales;Bifidobacteriaceae;Bifidobacterium	TGGGGAATATTGCACAATGGGCGCAAGCCTGATGCAGCGACGCCGCGTGAGGGATGGAGGCCTTCGGGTTGTAAACCTCTTTTATCAGGGAGCAAGGCTTCGGTTGAGTGTACCTGTTGAATAAGCACCGGCTAACTACGT
867	0	0	0	0	0	0	6	0	0	0.98	Root;Bacteria;Firmicutes;"Bacilli";Bacillales;Bacillaceae;"Bacillaceae 1";Bacillus;Bacillus c	TAGGGAATCTTCCGCAATGGACGAAAGTCTGACGGAGCAACACCGCGTGAGCGAAGAAGGCCTTCGGGTCGTAAAGCTCTGTTGTTAGGGAAGAACAAGTACGAGAGTAACTGCTCGCACCTTGACGGTACCTAACCAGAAAGCCACGGCTAACTACGT
868	1	4	0	0	0	0	49	0	0	0.91	Root;Bacteria;Proteobacteria;Alphaproteobacteria;Rhodobacterales;Rhodobacteraceae;Paracoccus	TGGGGAATCTTAGACAATGGGGGCAACCCTGATCTAGCCATGCCGCGTGAGTGATGAAGGCCTTAGGGTTGTAAAGCTCTTTAAGCTGGGAAGATAATGACGGTACCAGCAGAAGAAGCCCCGGCTAACTCCGT
869	0	0	0	0	0	0	1	0	0	1	Root;Bacteria;Cyanobacteria;Cyanobacteria;Chloroplast;Streptophyta	TGGGAATTTCCGCAATGGGCGAAGCCTGACGGAGCAATGCCGCGTGGAGGTAGAAGGCCTACGGGTCGTGAACTTCTTTTCCCGGAGAAGAAACAATGACGGTATCTGGGGAATAAGCATCGGCTAACTCTGT
870	0	0	0	0	1	4	0	0	0	0.94	Root;Bacteria;Firmicutes;"Clostridia";Clostridiales;"Lachnospiraceae";Dorea	TGGGGAATATTGCACAATGGGCGAAAGCCTGATGCAGCGACGCCGCGTGAAGGATGAAGTATTTCGGTATGTAAACTTCTATCAGCAGGGAAGAAAATGATGGTACCTGACTAAGAAGCCCCGGCTAACTACGT
871	0	0	0	0	0	0	1	0	0	0.93	Root;Bacteria	TGGAGAATATTTGACAATGGGCGAAAGCTTGATCGAGTAATGTTACGTGGGTGATCAGAAGGCTTAATTGCTGTAAAAACTCGTTTCGTCAAGGATTATAATGCAATCGTACTTGAAGGAGAAGCCCTGACTAACTTCGT
872	0	0	0	0	0	0	0	4	0	0.94	Root;Bacteria;Proteobacteria;Betaproteobacteria;Burkholderiales;Oxalobacteraceae	TGGGGAATTTTGGACAATGGGCGCAAGCCTGATCCAGCAATGCCGCGTGAGTGAAGAAGGCCTTCGGGTTGTAAAGCTCTTTTGTCAGGGAAGAAACGGGATTGGATAATACCTAGTCCTAATGACGGTACCTGAAGAATAAGCACCGGCTAACTACGT
873	0	0	2	2	0	0	49	2	0	0.9	Root;Bacteria;Proteobacteria;Betaproteobacteria;Burkholderiales;Comamonadaceae;Delftia	TGGGGAATTTTGGACAATGGGCGAAAGCCTGATCCAGCAATGCCGCGTGCAGGATGAAGGCCTTCGGGTTGTAAACTGCTTTTGTACGGAACGAAAAAGCTTCTCCTAATACGAGAGGCCCATGACGGTACCGTAAGAATAAGCACCGGCTAACTACGT
874	0	0	0	0	0	1	0	0	0	0.97	Root;Bacteria;Bacteroidetes;Bacteroidetes;Bacteroidales;Prevotellaceae	TGAGGAATATTGGTCAATGGGCGAGAGCCTGAACCAGCCAAGTAGCGTGCAGGATGACGGCCCTATGGGTTGTAAACTGCTTTTATAAGGGAATAAAGTGAGTCTCGTGTGGCTTATTGCAGGTACCATATGAATAAGGACCGGCTAATTCCGT
875	0	0	0	0	0	0	6	0	0	0.86	Root;Bacteria;Firmicutes;"Clostridia";Clostridiales;Veillonellaceae	TGGGGAATCTTCCGCAATGGACGAAAGTCTGACGGAGCAACGCCGCGTGAGTGAAGAAGGTTTTCGGATCGTAAAACTCTGTCTTTTAGGGCGAACGTATTGTTGGTGAACAATCAGCGATAGTGACGGTACTAAAGGAGGAAGCCACGGCTAACTACGT
876	0	0	0	0	0	0	0	1	0	0.86	Root;Bacteria;Bacteroidetes;Bacteroidetes;Bacteroidales	TGAGGAATATTGGTCAATGGACGAGAGTCTGAACCAGCCAAGTCGCGTGAAGGAAGACGGATCTATGGTTTGTAAACTTCTTTAGTGCGGGAACAAAGCGGTGTCGTGACGCCGGATGAGTGTACCGCAAGAATAAGCATCGGCTAACTTCGT
877	0	0	0	0	1	0	0	0	0	0.98	Root;Bacteria;Firmicutes;"Clostridia";Clostridiales;Veillonellaceae;Veillonella	TGGGGAAGTCTTCCGCAATGGACGAAAGTCTGACGGAGCAACGCCGCGTGAGTGATGACGGCCTTCGGGTTGTAAGGCTCTGTTAATCGGGGCGAATGGTTCTTGTGCGAATAGTGCGAGGATTTGACGGTACCGGAATAGAAAGCCACGGCTAACTACGT
878	0	0	0	0	0	0	0	0	4	0.93	Root;Bacteria;Bacteroidetes	TGAGGAATATTGGTCAATGGGCGGAAGCCTGAACCAGCCAAGTCGCGTGAGGGAAGACGGCCCTATGGGTTGTAAACCTCTTTTGCCGGGGAGCAAAAGCGCCGTGCGCGGTGCTATGAGAGTACCCGGAGAAAAAGCATCGGCTAACTCCGT
879	0	0	0	0	0	0	0	1	0	1	Root;Bacteria;Bacteroidetes;Bacteroidetes;Bacteroidales;Bacteroidaceae;Bacteroides	TGAGGAATATTGGTCAATGGACGAGAGTCTGAACCAGCCAAGTAGCGTGAAGGATGAAGGTTCTATGGATTGTAAACTTCTTTTATACGGGAATAAACGGATCCACGTGTGGATTTTTGCATGTACCGTATGAATAAGGATCGGCTAACTCCGT
880	0	0	0	0	0	7	0	0	0	0.89	Root;Bacteria;Bacteroidetes;Bacteroidetes;Bacteroidales;Prevotellaceae;Prevotella	TGAGGAATATTGGTCAATGGGCGAGAGCCTGAACCAGCCAAGTAGCGTGCAGGATGACGGCCCTATGGGTTGTAAACTGCTTTTATATGGGGATAAAGTGAGCCACGTGTGGCTCATTGCAGGTACCATATGAATAAGGACCGGCTAATTCCCGT
881	0	0	1	0	2	0	305	0	0	1	Root;Bacteria;Proteobacteria;Gammaproteobacteria;Pseudomonadales;Moraxellaceae;Psychrobacter	TGGGGAATATTGGACAATGGGGGAAACCCTGATCCAGCCATGCCGCGTGTGTGAAGAAGGCCTTTTGGTTGTAAAGCACTTTAAGCAGTGAAGAAGACTCCGTGGTTAATACCCACGGACGATGACATTAGCTGCAGAATAAGCACCGGCTAACTCTGT
882	0	0	0	0	0	0	1	0	0	0.96	Root;Bacteria;Proteobacteria;Gammaproteobacteria;Enterobacteriales;Enterobacteriaceae	TGGGGAATATTGCACAATGGACGCAAGCCTGATGCAGCCATGCCGCGTGTATGAAGAAGGCCTTCGGGTTGTAAAGTACTTTCAGCGGGGAGGAAGGGAGTAAAGTTAATGGGTAAAGAAGCACCGGCTAACTACGT
883	0	0	0	0	0	0	1	0	0	0.83	Root;Bacteria;Proteobacteria;Gammaproteobacteria;Pseudomonadales;Pseudomonadaceae;Flavimonas	ACCGAAATCGATGGGTTTGGTGAGCAGGCCAGCCGCCGCGTGTGTGAAGAAGGTCTTCGGATTGTAAAGCACTTTAAGTTGGGAGGAAGGGCAGTAAGCTAATACCTTGCTGTTTTGACGTTACCGACAGAATAAGCACCGGCTAACTCTGT
884	0	0	0	0	9	2	4	0	0	1	Root	GCGCGCAAATTACCCAATCCCGACACGGGGAGGTAGTGACAATAAATACTGATACGGGGCTCTTTTGGGTCTCGTAATTGGAATGAGTACAATCTAAAATCCCTTAACGAGGAACAATTGGAGGGCAAGTCTGGT
885	0	0	0	0	0	0	1	0	0	0.85	Root;Bacteria;Proteobacteria	TGGGGAATTTTGGACAATGGGCGAAAGCCTGATCCAGCAATGCCGCGTGTGTGAAGAAGGCCTTCGGGTTGTAAAGCTCTGTCATCCGGGAAAAACGGCTATCTGGGGAAAGTTCAGGTAGCGTGATGGTACCGGAGGAGGAAGCACCGGCAAACTCTGT
886	0	0	0	0	1	0	5	0	0	0.87	Root;Bacteria;Cyanobacteria;Cyanobacteria;Chloroplast;Streptophyta	TGGGGAATTTTCCGCAATGGGCGAAAGCCTGACGGAGCAATGCCGCGTGGAGGTAGAAGGCCCACGGGTCGTGAACTTCTTTTCCCGGAGAAGAAGCAATGACGGTACCTGAAGAATAAGCACCGGCTAACTACGT
887	0	0	0	0	0	0	1	0	0	1	Root;Bacteria;Proteobacteria;Gammaproteobacteria;Pseudomonadales;Moraxellaceae;Acinetobacter	TAGGGAATCTTGGACAATGGGGGAACCCGTGATCCAGCCATGCCGCGTGTGTGAAGAAGGCCTTATGGTTGTAAAGCACTTTAAGCGAGGAGGAGGCTACTGAGACTAATACTCTTGGATAGTGGACGTTACTCGCAGAATAAGCACCGGCTAACTCTGT
888	0	0	0	0	19	0	0	0	0	1	Root;Bacteria;Spirochaetes;Spirochaetes;Spirochaetales;Serpulinaceae;Brachyspira	CTGAGAATCTTCCACAATGGACGAAAGTCTGATGGAGCGACATCGCGTGAGGGATGAAGGCCTTCGGGTTGTAAACCTTGGAAATTATCGAAGAATGAGTGACAGTAGATAATGTAAGCCTCGGCTAACTACGT
889	0	0	0	0	1	0	46	0	0	1	Root;Bacteria;Proteobacteria;Gammaproteobacteria;Pseudomonadales;Pseudomonadaceae;Pseudomonas	TGGGGAATATTGGACAATGGGCGAAAGCCTGATCCAGCCATGCCGCGTGTGTGAAGAAGGTCTTCGGATTGTAAAGCACTTTAAGTTGGGAGGAAGGGCAGTTGCCTAATACGTAACTGTTTTGACGTTACCGACAGAATAAGCACCGGCTAACTCTGT
890	0	0	0	6	0	0	0	0	0	0.84	Root;Bacteria;Firmicutes;"Bacilli";Bacillales;Bacillaceae;"Bacillaceae 1";Bacillus	TAGGGAATCTTCCGCAATGGACGAAAGTCTGACGGAGCAACGCCGCGTGAGTGAAGAAGGCCTTCGGGTCGTAAAGCTCTGTTGTTAGGGGAAGAACAAGTGTCGTTTGAATAAGGCGGCACCTTGACGGTACCTAACCAGAAAGCCACGGCTAACTACGT
891	1	0	0	4	0	0	0	0	0	0.83	Root;Bacteria;Firmicutes;"Bacilli";Bacillales;Bacillaceae	TAGGGAATCTTCCGCAATGGACGAAAGTCTGACGGAGCAACGCCGCGTGAGTGAAGAAGGTTTTCGGATCGTAAAACTCTGTTGTTAGGGAAGAACAAGTTGGATAGTAACTGATCCAACCTTGACGGTACCTAACCAGAAAGCCACGGCTAACTACGT
892	0	0	0	0	5	0	0	0	0	0.99	Root;Bacteria	TGGGGAATATTGGGCAATGGGGGGAACCCTGACCCAGCAACGCCGCGTGAAGGAAGAAGGCTTTCGGGTTGTAAACTTCTTTTACCAGGGGCGAATCAATGACGGTACCTGGAGAAAAGCAACGGCTAACTACGT
893	0	0	0	0	0	0	8	0	0	0.97	Root;Bacteria;Bacteroidetes;Flavobacteria;Flavobacteriales;Flavobacteriaceae	TGAGGAATATTGGTCAATGGTCGCAAGACTGAACCAGCCATGCCGCGTGCAGGATGAAGCATCTATGGTGTGTAAACTGCTTTTGTACGGGAAGAAACACTGCTACGTGTAGCAGCTTGACGGTACCGTAAGAATAAGGATCGGCTAACTCCGT
894	0	0	0	0	0	0	80	0	0	0.96	Root;Bacteria	TGGGGAATCTTGGACAATGGGCGAAAGCCCGATCCAGCAATATCGCGTGAGTGAAGAAGGGCAATGCCGCTTGTAAAGCTCTTTCGTCGAGTGCGCGATCATGACAGGACTCGAGGAAGAAGCCCCGGCTAACTCCGT
895	0	0	0	0	0	0	4	0	0	0.92	Root;Bacteria;Proteobacteria;Betaproteobacteria;Burkholderiales;Comamonadaceae;Curvibacter	TGGGGAATTTTGGACAATGGGCGAAAGCCTGATCCAGCCATGCCGCGTGCAGGATGAAGGCCTTCGGGTTGTAAACTGCTTTTGTACGGAACGAAAAGGTTTGGCCTAATAAGCTGAGCTCATGACGGTACCGTAAGAATAAGCACCGGCTAACTACGT
896	0	0	0	0	0	0	2	0	0	0.91	Root;Bacteria;Proteobacteria;Betaproteobacteria;Burkholderiales;Comamonadaceae	TGGGGAATTTTGGACAATGGGCGTAAGCCTGATCCAGCAATGCCGCGTGCAGGATGAAGGCCTTCGGGTTGTAAACTGCTTTTGTACGGAACGAAACGGTGAGCTCTAATACAGTTTGCTAATGACGGTACCGTAAGAATAAGCACCGGCTAACTATGT
897	0	0	0	0	0	0	0	3	0	0.97	Root;Bacteria;Bacteroidetes;Bacteroidetes;Bacteroidales;Bacteroidaceae;Bacteroides	TGAGGAATATTGGTCAATGGGCGAGAGCCTGAACCAGCCAAGTAGCGTGAAGGATGAAGGTCCTACGGATTGTAAACTTCTTTTATACGGGAATAAAGTATCCTACGTGTAGGATTTTGTATGTACCGTATGAATAAGCATCGGCTAACTCCGT
898	0	0	0	0	0	1	0	0	0	1	Root;Bacteria;Actinobacteria;Actinobacteria;Actinobacteridae;Actinomycetales	TGGGGAATCTTGCACAATGGGCGAAAGCCTGATGCAGCGACGCCGCGTGAGGGATGACGGCCTTCGGGTTGTAAACCTCTTTCAGCAGGGAAGAAGCTTTTGTGACGGTACCTGCAGAAGAAGCACCGGCTAACTACGT
899	0	0	0	0	0	0	0	0	1	0.86	Root;Bacteria;Bacteroidetes	TGAGGAATATTGGTCAATGGGCGGTAGCCTGAACCAGCCAAGTCGTGTGAGGGACGACGGCCCTACGGGTTGTAAACCTCTTTTGCCGGGGAGCAAGGCGGGCCACGTGTGGCACGTCGGAGAGTACCCGGAGAAAAAGCATCGGCTAACTCCGT
900	0	0	0	0	0	0	3	0	0	0.84	Root;Bacteria;Actinobacteria;Actinobacteria;Actinobacteridae;Actinomycetales;Corynebacterineae;Corynebacteriaceae;Corynebacterium	TGGGGAATATTGCACAATGGGCGGAAGCCTGATGCAGCGACGCCGCGTGGGGGATGACGGCCTTCGGGTTGTAAACTCCTTTCGACAGGGACGAAGCGCAAGTGACGGTACCTGTATAAGAAGCACCGGCTAACTACGT
901	0	0	0	0	1	0	0	0	0	0.92	Root;Bacteria;Firmicutes	TAGGGAATCTTCCGCAATGGACGAAAGTCTGACGGAGCAACGCCGCGTGAGTGAGGAAGGTTTTCGGATCGTAAAGCTCTGTTGTTGGTGAAGAACCCTCCTGTGAGGAAATGCACAGGAGTTGACGGTAGCCAACCAGAAAGCCCCGGCTAACTACGT
902	0	0	2	0	0	0	0	0	0	1	Root;Bacteria;Bacteroidetes;Sphingobacteria;Sphingobacteriales;Flexibacteraceae;Flectobacillus	TAGGGAATATTGGGCAATGGGCGGAAGCCTGACCCAGCCATGCCGCGTGCAGGATGAAGGCGTTATGCGTTGTAAACTGCTTTTTTATAGGAAGAAGGAGGCCTTGCGAGGCTTGGTGACGGTACTATAAGAATAAGCACCGGCTAACTCCGT
903	0	0	0	0	0	0	0	2	0	0.81	Root;Bacteria;Bacteroidetes	TGAGGAATATTGGTCAATGGTCGGAAGACTGAACCAGCCAAGCCGCGTGAAGGAAGAAGGTGCTCGGCATCGTAAACTTCTTTTGTCAGGGAACAAAGGGCGGTACGTGTACCGCTGTGAGTGTACCTGAAGAAAAAGCATCGGCTAACTCCGT
904	0	0	0	0	0	1	0	0	0	0.96	Root;Bacteria;Proteobacteria;Gammaproteobacteria;Aeromonadales	TAGGGAATATTGCACAATGGGGGAAACCCTGATGCAGCCATGCCGCGTGTGTGAAGAAGGCCTTCGGGTTGTAAAGCACTTTCAGTGGGGAGGAAACACTGACGTTACCCACAGAAGAAGCACCGGCTAACTCCGT
905	0	0	0	0	3	0	0	0	1	1	Root;Bacteria	TTAGGAATATTCGTCAATGGGGGAAACCCTGAACGAGCAATGCCGCGTGAAGGATGACGGTCCTATGGATTGTAAACTTCTGTTGTTAGGGAAGAACGACCTATGTAGGAAATGACATAGGAGTGACGGTACCTTTCAAGAAAGCTCCGGCTAACTACGT
906	0	0	0	0	0	0	0	0	2	1	Root;Bacteria	TGAGGGATATTGCACAATGGGCGCAAGCCTGATGCAGCGACGCCGCGTGAGGGAAGACGGTCCTCTGGATTGTAAACCTCTGTCTTATGGGACGAAAAAGGACGGTACCATAGGAGGAAGCTCCGGCTAACTACGT
907	0	0	0	0	0	0	1	0	0	1	Root;Bacteria	TGGGGAATATTGGACAATGGGGGAACCCTGATCCAGCCATGCCGCGTGTGTGAAGAAGGCCTTATGGTTGTAAACTTCTTTTATAGGGGAAGAAAAGCAGAGATTCTTCTTTGTCTGACGGTACCCTATGAATAAGCACCGGCTAACTCCGT
908	0	0	0	0	1	0	0	0	0	0.92	Root;Bacteria	ACAGTTGCGGGTCAGCACCGCCAGATTGCCGAACAGTTCCGGCAGCGGCTTTTCCATCGTCTTTTCAAAGGGCGCGTGAAGACCTGTCACATAGCCGTTGCCGATGAAACAGGCCGGTTCATTGATGGTCATCCAGTACTGCACCTGGTCGGACAGAGCGTCCACCACAATCCCCACATACTCCGCAAAGGCATCGACAATGGCTTCACTGT
909	4	0	0	0	0	0	0	0	0	0.84	Root;Bacteria;Firmicutes;"Bacilli";Bacillales;Bacillaceae;"Bacillaceae 2";Oceanobacillus	TAGGGAATCTTCCGCAATGGACGAAAGTCTGACGGAGCAACGCCGCGTGAGTGATGAAGGTTTTCGGATCGTAAAACTCTGTTGTTAGGGAAGAACAAGTAGGGTAGTAACTGACCCTACCTTGACGGTACCTAACCAGAAAGCCACGGCTAACTACGT
910	0	0	0	0	0	0	1	0	0	0.85	Root;Bacteria;Proteobacteria;Gammaproteobacteria	TGGGGAATTTTGGACAATGGGCGAAAGCCTGATCCAGCAATGCCGCGTGTGTGAAGAAGGCCTTCGGGTTGTAAAGCACTTTTGTTCGGGAAGAAGGTGTTGTGGTTAATAACCACAGCAATTGACGTTACCCGCAGAAGAAGCACCGGCTAACTCCGT
911	0	0	0	0	0	0	2	0	0	1	Root;Bacteria;Proteobacteria;Gammaproteobacteria;Pseudomonadales;Moraxellaceae	TGGGGAATATTGGACAATGGGGGGAACCCTGATCCAGCCATGCCGCGTGTGTGAAGGAGGCCTTTTGGTTGTAAAGCACTTTAAGCGGGGAGGAGGCTACTTAGATTAATACTCTAGGATAGTGGACGTTACCCGCAGAATAAGCACCGGCTAACTCTGT
912	0	0	0	0	0	1	0	0	0	0.94	Root;Bacteria;Bacteroidetes;Bacteroidetes;Bacteroidales;Prevotellaceae	TGGGGAATATTGCACAATGGGCGCGAGCCTGAACCAGCCAAGTAGCGTGCAGGATGACGGCCCTATGGGTTGTAAACTGCTTTTACAGGGGGATAAAGTGTGGTACGTGTACCATATTGCAGGTACCCTATGAATAAGGACCGGCTAATTCCGT
913	0	0	0	0	1	1	0	0	0	0.97	Root;Bacteria;Actinobacteria;Actinobacteria;Actinobacteridae;Actinomycetales	TGGGGAATCTTGCGCAATGGGCGGAAGCCTGACGCAGCAACGCCGCGTGGGGGATGACGGCCTTCGGGTTGTAAACCTCTTTCGGCAGGGGCGAAGCCTCGCTTGTTGGTGGGGTGACGGTACCTGTAGAAGAAGCACCGGCCAACTACGT
914	0	0	0	0	7	0	0	0	0	1	Root;Bacteria	TGGGGAATATTGGGCAATGGACGAAAGTCTGACCCAGCGACGCCGCGTGAGGAATGAAGATCTTCGGATTGTAAACCTTTGTCAACAAGGACGAAGCAAGTGACGGTACCTGTGGAGGAAGCCACGGCTAACTACGT
915	0	0	0	0	5	0	0	0	0	0.98	Root;Bacteria;Firmicutes;"Clostridia";Clostridiales;"Lachnospiraceae"	TGGGGAATATTGCACAATGGGGGAAACCCTGATGCAGCAACGCCGCGTGAGTGAAGAAGTATTTCGGTATGTAAAGCTCTATCAGCAGGAAAGAAAATGACGGTACCTGACTAAGAAGCACTGGCTAAATACGT
916	0	0	0	0	1	0	0	0	0	0.97	Root;Bacteria;Firmicutes;"Clostridia";Clostridiales	TGGGGAATATTGCACAATGGAGGAAACTCTGATGCAGCGACGCCGCGTGAGTGAAGAAGTATTTCGATATGTAAAGCTCTATCAGCAGGGAAGAAGATGACGGTACTCAACAAGGAAGTGACGGCTAACTACGT
917	0	0	0	0	0	1	0	0	0	0.9	Root;Bacteria;Acidobacteria;Acidobacteria;Acidobacteriales;Acidobacteriaceae;Gp6	TGGGGAATTGTTCGCAATGGGCGCAAGCCTGACGACGCAACGCCGCGTGGAGGACGAAGATCTTCAGGTCGTAAACTCCTGTCGAGCGGGACGAACGCTTCCTGGGTGAATAGCCTGGGAAAATGACGGTACCGCTAAAGGAAGCCCCGGCTAACTCCGT
918	0	0	0	0	0	3	0	0	4	1	Root;Bacteria	TGGGGAATTTTGCGCAATGGGGGCAACCCTGACGCAGCGACGCCGCGTGCGGGACGAAGTCATTCGTGACGTAAACCGCTTTCAGCGAGGAAGAACCATGACGGTACTCGCAGAAGAAGCCCCGGCTAACTACGT
919	0	0	0	0	0	19	0	16	0	0.93	Root;Bacteria;Firmicutes;"Bacilli";"Lactobacillales";Lactobacillaceae;Lactobacillus	TAGGGAATCTTCCACAATGGACGAAAGTCTGATGGAGCAACGCCGCGTGAATGAAGAAGGCCTTCGGGTCGTAAAATTCTGTTGTCAGAGAAGAACGTGCGTGAGAGTAACTGTTCACGTATTGACGGTATCTGACCAGAAAGCCACGGCTAACTACGT
920	0	0	0	0	0	0	0	0	4	1	Root;Bacteria;TM7;TM7_genera_incertae_sedis	TAGGGAATCTTTCACAATGGGCGAAAGCCTGATGGAGCAACGCCGCGTGCAGGATGAAGGCCTTCGGGTTGTAAACTGCTTTTATAAGCGAGAAATATGATGGTAACTTATGAATAAGGATCGGCTAACTACGT
921	0	0	0	0	1	0	0	0	0	1	Root;Bacteria;Firmicutes;"Clostridia";Clostridiales;"Ruminococcaceae";Faecalibacterium	TGGGGAAGTATTACACAATGGGGGAAACCCGTAGATGCAGCGACGCCGCGTGGAGGAAGAAGGTCTTCGGATTGTAAACTCCTGTTGTTGAGGAAGATAATGACGGTACTCAACAAGGAAGTGACGGCTAACTACGT
922	0	0	0	0	0	5	0	0	0	0.96	Root;Bacteria;Firmicutes;"Bacilli";"Lactobacillales";"Carnobacteriaceae";"Carnobacteriaceae 1"	TAGGGAATCTTCCGCAATGGACGAAAGTCTGACGGAGCAACGCCGCGTGAGTGAAGAAGGTTTTCGGATCGTAAAACTCTGTTGTTAGAGAAGAACAAGGATGAGAGTAACTGCTCGTCCCTTGACGGTATCTAACCAGAAAGCCATGGCTAACTACGT
923	0	0	0	0	0	2	0	0	0	0.98	Root;Bacteria;Bacteroidetes;Bacteroidetes;Bacteroidales;Prevotellaceae	TGGGGAATATTGCACAATGGGCGAGAGCCTGAACCAGCCAAGTAGCGTGCAGGATGACGGCCCTATGGGTTGTAAACTGCTTTTATATGGGGATAAAGTGAGCCACGTGTGGCTTATTGCAGGTACCATATGAATAAGGACCGGCTAATTCCGT
924	0	0	0	0	0	0	4	0	0	0.8	Root;Bacteria;Proteobacteria;Betaproteobacteria;Burkholderiales;Oxalobacteraceae;Herbaspirillum	TGGGGAATTTTGGACAATGGGGGCAACCCTGATCCAGCAATGCCGCGTGAGTGAAGAAGGCCTTCGGGTTGTAAAGCTCTTTTGTCAGGGGAAGAAACGGTCTCAGCTAATATCTGGGGCTAATGACGGTACCTGAAGAATAAGCACCGGCTAACTACGT
925	0	0	0	0	0	0	0	1	0	0.92	Root;Bacteria;Firmicutes;"Clostridia";Clostridiales;"Eubacteriaceae";Eubacterium	TGGGGAATATTGCGCAATGGGGGCAACCCTGACGCAGCAATACCGCGTGAGTGAAGAAGGTTTTCGGATCGTAAAGCTCTGTTATTGGGGAAGAAGAATGACGGTACCCAATGAGGAAGTCCCGGCTAACTACGT
926	0	0	0	1	0	0	0	0	0	0.94	Root;Bacteria	GGGGTTGGCACACTATATTCTTGTCGTAATATACTCCACGTCCGTCCATCGCGGTGGAATAGTGGTTGTTCTCTTTTTCAGGGGCTTTGTCTGATGGTTCTGTAAGATCCCGTTCAGGGGTTGCGGGTTGAGATCTGGGTAGAGAGAACCAGGTTGAAGAGCTGCTTCAGTACGTCATTAGACAGGGAAGGGGAAGTTTGATGCCAAGGTTCTG
927	0	0	0	0	0	0	1	0	0	0.96	Root;Bacteria;Proteobacteria;Alphaproteobacteria	TGGGGAATATTGGACAATGGGGGCAACCCTGATCCAGCCATGCCGCGTGAGTGATGAAGGCCCTAGGGTTGTAAAGCTCTTTTACTGGGGATGATAATGACAGTACCCAGAGAATAAGCCCCGGCTAACTCCGT
928	0	0	0	0	0	0	0	4	0	1	Root;Bacteria	TGAGGGATATTGGTCAATGGGGGAAACCCTGAACCAGCAACGCCGCGTGAGGGATGACGGCCTTCGGGTTGTAAACCTCTGTCCTCTGTGAAGATAATGACGGTAGCAGAGGAGGAAGCTCCGGCTAACTACGT
929	0	0	0	0	8	0	0	0	0	1	Root;Bacteria	TGGGGAATATTGGGCAATGGGCGAAAGCCTGACCCAGCGACGCCGCGTGAAGGATGAAGGTCTTCGGATTGTAAACTTCTGTCTACAGGGGACGAACAAATGACGGTACCTGTAAAGAAAGCCACGGCTAACTACGT
930	0	0	0	0	0	0	2	0	0	0.9	Root;Bacteria;Proteobacteria;Gammaproteobacteria;Enterobacteriales;Enterobacteriaceae;Klebsiella	TGGGGAATATTGCACAATGGGCGCAAGCCTGATGCAGCCATGCCGCGTGTGTGAAGAAGGCCTTCGGGTTGTAAAGCACTTTCAGCGGGGAGGAAGGCGGTGAGGTTAATAACCTCATCGATTGACGTTACCCGCAGAAGAAGCACCGGCTAACTCCGT
931	0	0	0	0	1	0	0	0	0	1	Root;Bacteria	TAGGGAATTTTCGGCAATGGACGGAAGTCTGACCGAGCAACGCCGCGTGAATGATGAAGTATTTCGGTATGTAAAGTTCTTTTATTTGGGAAGAACATACGTGTAAGTAACTGTGCACGTCTTGACGGTACCTAATCAGAAAGCCACGGCTAACTACGT
932	0	0	0	0	2	0	0	0	0	0.96	Root;Bacteria;Actinobacteria;Actinobacteria;Rubrobacteridae;Rubrobacterales;Rubrobacterineae;Rubrobacteraceae	TGGGGAATCTTGCGCAATGCGCGAAAGCGTGACGCAGCAACGCCGCGTGGGGGAAGAAGGCCTTCGGGTTGTAAACCCCTTTCAGTTGGGACGAAGCTTCGCCGGTGAATAGCCGGCTGGAGTGACGGTACCTTCACAAGAAGCCCCGGCTAACTACGT
933	0	0	0	0	0	0	0	5	2	1	Root;Bacteria	TGGGGAATATTGGGCAATGGGCGCAAGCCTGACCCAGCAACGCCGCGTGAGGGAAGAAGGTTTTCGGATTGTAAACCTCTGTCGCAGGGGACGAAGGAAGTGACGGTACCCTGTAAGAAAGCCCCGGCTAACTACGT
934	0	0	0	0	3	4	0	0	0	0.84	Root;Bacteria;Firmicutes;"Erysipelotrichi";"Erysipelotrichales";Erysipelotrichaceae	TAGGGAATTTTCGGCAATGGGGGCAACCCTGACCGAGCAACGCCGCGTGAGTGATGAAAGTCTTCGGATTGTAAAGCTCTGTTGTAAGGGAAGAATGGCTTGAGGAGAACTCAAGAGTGACGGTACCTTACCAGAAAGCCACGGCTAACTACGT
935	0	0	0	0	0	0	0	9	0	1	Root;Bacteria;Firmicutes;"Bacilli";"Lactobacillales";Streptococcaceae;Streptococcus	TAGGGAATCTTCGGCAATGGGGGCAACCCTGACCGAGCAACGCCGCGTGAGTGAAGAAGGTTTTCGGATCGTAAAGCTCTGTTGTAAGTCAAGAACGGGTGTGAGAGTGGAAAGTTCACACTGTGACGGTAGCTTACCAGAAAGGGACGGCTAACTACGT
936	0	0	0	0	0	1	0	0	0	0.82	Root;Bacteria;Firmicutes;"Clostridia";Clostridiales	TGGGGAATATTGGGCAATGTGGGAAACCCTGACCCAGCAACGCCGCGTGAAGGAAGAAGGCCTTCGGGTTGTAAACTTCTTTTAGCAGGGACGAAGGACGTGACGGTACCAAAGGAGGAAGCCACGGCTAACTACGT
937	0	0	0	0	0	0	0	0	1	0.94	Root;Bacteria;Bacteroidetes	TGAGGAATATTGGTCAATGGGCGGAAGCCTGAACCAGCCATGCCGCGTGCAGGAAGAATGTCTTATGGATTGTAAACTGCTTTTCTTCGAGAATAATAAGAAGTTTGCGAACTTTGATGCAGGTATCGAAGGAAAAAGGATCGGCTAACTCCGT
938	0	0	0	0	0	0	1	0	0	1	Root;Bacteria	TAGGGAATCTTCCGCAATGGGCGAAAGCCTGACGGAGCAACGCCGCGTGAGTGATGAAGGTCTTCGGATCGTAAAACTACTGTTATTAGGTAATATCTGTGACGTTACTCGCAGAAGAAGCACCGGCTAACTCCGT
939	0	0	0	0	2	0	0	0	0	1	Root;Bacteria;Firmicutes;"Clostridia";Clostridiales;Veillonellaceae;Veillonella	TGGGGAATCTTCCGCAATGGACGAAAGTCTGACGGAGCAACGCCGCGTGAGTGATGACGGCCTTCGGGTTGTAAAGCTCTGTTAATCGGGACGAATGGTTCTTGTGCGAATAGTGCGAGGATTTGACGGTACCGGAATAGAAAGCCACGGCTAACTACGT
940	0	0	0	0	0	0	0	0	12	0.85	Root;Bacteria;Bacteroidetes;Bacteroidetes;Bacteroidales	TGAGGAATATTGGTCAATGGCCGAGAGGCTGAACCAGCCAAGTCGCGTGAGGGAAGACGGCCCTACGGGTTGTAAACCTCTTTTGTCAGGGAGCAAAGAACGCCACGAGTGGCGTCTCGAGAGTACCTGAAGAAAAAGCATCGGCTAACTCCGT
941	0	0	0	0	1	0	0	0	0	0.99	Root;Bacteria	TGGGGAATATTGCGCAATGGGGGAAACCCTGACGCAGCAACGCCGCGTGAAGGAAGAAGGCCTTCGAGTTGTAAACTTTTGTCGCAAGGGAAGAAGACAGTGACGGTACCTTGTGAGAAAGCCACGGCTAACTACGT
942	0	0	0	0	14	2	0	0	0	0.93	Root;Bacteria;Firmicutes;"Clostridia";Clostridiales;Veillonellaceae	TGGGGAATCTTCCGCAATGGGCGAAAGCCTGACGGAGCAACGCCGCGTGAGTGAAGAAGGGTTTCGGCTCGTAAAGCTCTGTTGTCGGGGACGAACGTAAGACGTGTGAACAATGCGTTTTAATGACGGTACCTGACGAGGAAGCCACGGCTAACTACGT
943	0	0	0	0	0	0	0	0	3	0.92	Root;Bacteria;Bacteroidetes;Bacteroidetes;Bacteroidales;Prevotellaceae;Prevotella	TGAGGAATATTGGTCAATGGGCGAGAGCCTGAACCAGCCAAGTAGCGTGCAGGACGACGGCCCTATGGGTTGTAAACTGCTTTTATACGGGAATAAAGTGATGCCTGCGGGCGTTATTGCATGTACCGTACGAATAAGGACCGGCTAATTCCGT
944	0	0	0	0	0	0	0	1	0	1	Root;Bacteria	TGGGGAATATTGGGCAATGGAGGCAACTCTGACCCAGCAACGCCGCGTGAGGGAAGAAGGTTTTCGGATTGTAAACCTCTGTCCTTGGGGACGAAGGAAGTGACGGTACCCGAGGAGGAAGCCCCGGCTAACTACGT
945	0	0	0	0	0	0	0	0	2	0.96	Root;Bacteria	TAGGGAATATTGGGCAATGGGAGCAATCCTGACCCAGCCATGCCGCGTGAAGGAATACGGCCCTACGGGTCTTAAACTTCTTTTGCCGCGGAGTAACCGCCGGGACGTGTCCCGGCCTGAGAGTACGCGGCGAATAAGTATCGGCTAACTCCGT
946	0	0	0	0	2	0	0	0	1	1	Root;Bacteria	TAGGGAATTTTGCGCAATGGGCGAAAGCCTGACGCAGCAACGCCGCGTGAATGTTAAACCCTTCGGGGTGTAAAGTTCTGTCAGTGGGGACGAACAAATGACGGTACCCACAGAGGAAGCACCGGCTAACTCCGT
947	0	0	0	0	1	0	0	0	0	0.87	Root;Bacteria;Firmicutes;"Clostridia";Clostridiales	TGGGAAATATTGCACAATGGGGGAAACCCTGATGCAGCGACGCCGCGTGAAGGATGAAGGTTTTCGGATTGTAAACTTCTTTTATTTAGGACGAAGAATGACGGTACTAAATGAATAAGCTCCGGCTAACTACGT
948	0	0	0	0	12	0	0	0	0	0.92	Root;Bacteria;Firmicutes;"Clostridia";Clostridiales	TGGGGAATATTGCACAATGGAGGAAACTCTGATGCAGCAACGCCGCGTGAAGGAAGAAGTATTTCGGTATGTAAACTTCTATCAGTAGGGAAGAAACAAATGACGGTACCTAACTAAGAAGAACCGGCTAAATACGT
949	0	0	0	0	0	0	3	0	0	0.95	Root;Bacteria;Proteobacteria;Betaproteobacteria;Burkholderiales;Incertae sedis 5;Tepidicella	TGGGGAATTTTGGACAATGGGCGCAAGCCTGATCCAGCAATGCCGCGTGCGGGAAGAAGGCCTTCGGGTTGTAAACCGCTTTTGTACGGAACGAAAAGGCTCTGGCTAATACCTGGGGCTGATGACGGTACCGTAAGAATAAGCACCGGCTAACTACGT
950	0	0	0	0	1	0	0	0	0	0.8	Root;Bacteria;Bacteroidetes;Bacteroidetes;Bacteroidales;Prevotellaceae;Prevotella	TGAGGAATATTGGTCAATGGGACGAGAGCTGAACCAGCCAAGTAGCGTGCAGGATGACGGCCCTATGGGTTGTAAACTGCTTTTATAAGGGAATAAAGTGAGTCTCGTGAGACTTTTTGCATGTACCTTATGAATAAGGACCGGCTAATTCCGT
951	0	0	10	6	0	0	0	0	0	0.94	Root;Bacteria;Firmicutes;"Bacilli";Bacillales;Bacillaceae	TAGGGAATCTTCCGCAATGGACGAAAGTCTGACGGAGCAACGCCGCGTGAGTGATGAAGGTTTTCGGATCGTAAAACTCTGTTGTTAGGGGAAGAACAAGTATTGTTCGAATAGGACAGTACCTTGACGGTACTTAACCAGAAAGCCCCGGCTAACTACGT
952	0	0	0	0	0	0	10	0	0	0.98	Root;Bacteria;Cyanobacteria;Cyanobacteria;Chloroplast;Streptophyta	TGGGGAATTTTCCGCAATGGGCGAAAGCCTGACGGAGCAGTGCCGCGTGAAGGCAGAAGGCCCACGGGTCGTGAACTTCTTCTCTCGGAGAAGAAGCAATGACGGTATCTGAGGAATAAGCATCGGCTAACTCTGT
953	0	0	0	0	0	0	1	0	0	1	Root;Bacteria;Proteobacteria;Gammaproteobacteria;Enterobacteriales;Enterobacteriaceae	TGGGGAATATTGCACAATGGGCGCAAGCCTGATGCAGCCACGCCGCGTGTATGAAGAAGGCCTTCGGGTTGTAAAGTACTTTCAGCGAGGAGGAAGGCATTAAGGTTAATAACCTTGCTCATTGACGTTACCCGCAGAAGAAGCACCGGCTAACTCCGT
954	0	0	0	0	0	16	0	0	0	0.99	Root;Bacteria;Actinobacteria;Actinobacteria;Actinobacteridae;Bifidobacteriales;Bifidobacteriaceae;Bifidobacterium	TGGGGAATATTGCACAATGGGCGCAAGCCTGATGCAGCGACGCCGCGTGAGGGATGGAGGCCTTCGGGTTGTAAACCTCTTTTATCGGGGAGCAAGCGTGAGTGAGTTTACCCGTTGAATAAGCACCGGCTAACTACGT
955	0	0	0	0	1	1	0	0	0	0.82	Root;Bacteria;Actinobacteria;Actinobacteria;Actinobacteridae;Actinomycetales;Pseudonocardineae;Pseudonocardiaceae;Saccharopolyspora	TGGGGAATCTTGCGCAATGGGCGAAAGCCTGACGCAGCAACGCCGCGTGAGGGAGGACGGCCTTCGGGTTGTAAACCTCTTTCGACACCGACGAAGGCCCCGTGTGGGTGTGACGGTAGGTGTAGAAGAAGCACCGGCTAACTACGT
956	0	0	0	0	0	0	0	1	0	1	Root;Bacteria;Bacteroidetes;Bacteroidetes;Bacteroidales;Rikenellaceae;Alistipes	TGAGGAATATTGGTCAATGGACGCAAGTCTGAACCAGCCATGCCGCGTGCAGGAAGACGGCTCTATGAGTTGTAAACTGCTTTTGTACGAGAGTAAACGCTCTTACGTGTAAGAGCCTGAAAGTATCGTACGAATAAGGATCGGCTAACTCCGT
957	0	0	0	0	0	0	0	3	0	1	Root;Bacteria;Bacteroidetes;Bacteroidetes;Bacteroidales;Rikenellaceae;Alistipes	TGAGGAATATTGGTCAATGGACGCAAGTCTGAACCAGCCATGCCGCGTGCAGGATGACGGCTCTATGAGTTGTAAACTGCTTTTGTACGAGGGTAAACTCACCTACGTGTAGGTGACTGAAAGTATCGTACGAATAAGGATCGGCTAACTCCGT
958	0	0	0	0	2	17	0	0	1	0.99	Root;Bacteria;Actinobacteria;Actinobacteria;Coriobacteridae;Coriobacteriales;Coriobacterineae;Coriobacteriaceae	TGGGGAATCTTGCGCAATGGGGGGAACCCTGACGCAGCGACGCCGCGTGCGGGACGAAGGCCCTAGGGTCGTAAACCGCTTTCAGCAGGGAAGAGGCCGAGAGGTGACGGTACCTGCAGAAGAAGCCCCGGCTAACTACGT
959	0	0	0	0	0	0	0	0	3	0.94	Root;Bacteria;Firmicutes;"Erysipelotrichi";"Erysipelotrichales";Erysipelotrichaceae	TAGGGAATTTTCGGCAATGGGGGAAACCCTGACCGAGCAACGCCGCGTGAGTGAAGAAGGTCTTCGGATTGTAAAGCTCTGTTGTAAGGGAAGAACGGTATAAAGAGAATTTATACATGACGGTACCTTACCAGAAAGCTACGGCTAACTACGT
960	0	0	0	0	0	0	0	4	0	1	Root;Bacteria;Bacteroidetes;Bacteroidetes;Bacteroidales;Rikenellaceae;Alistipes	TGAGGAATATTGGTCAATGGACGCAAGTCTGAACCAGCCATGCCGCGTGCAGGATGACGGCTCTATGAGTTGTAAACTGCTTTTGTACGAGGGTAAACGCAGATACGTGTATCTGTCTGAAAGTATCGTACGAATAAGGATCGGCTAACTCCGT
961	0	0	0	0	0	0	3	0	0	0.8	Root;Bacteria;Actinobacteria;Actinobacteria;Actinobacteridae;Actinomycetales;Micrococcineae;Microbacteriaceae	TGGGGAATATTGCACAATGGGCGAAAGCCTGATGCAGCAACGCCGCGTGAGGGACGACGGCCTTCGGGTTGTAAACCTCTTTTAGTAGGGGAAGAAGCGAAAGTGACGGTACCTGCAGAATAAGCTCCGGCTAACTCCGT
962	0	0	0	0	58	13	0	2	22	0.84	Root;Bacteria;Firmicutes;"Clostridia";Clostridiales	TGGGGAATATTGGGCAATGGGCGAAAGCCTGACCCAGCAACGCCGCGTGAAGGAAGAAGGCCTTCGGGTTGTAAACTTCTTTTACCAGGGACGAAGGACGTGACGGTACCTGGAGAAAAAGCAACGGCTAACTACGT
963	0	0	0	0	65	2	0	8	7	0.8	Root;Bacteria;Firmicutes;"Clostridia";Clostridiales	TGGGGAATATTGGGCAATGGGGGAAACCCTGACCCAGCAACGCCGCGTGAAGGAAGAAGGCTTTCGGGTTGTAAACTTCTTTTACCAGGGACGAAGAAAGTGACGGTACCTGGAGAAAAAGCCACGGCTAACTACGT
964	0	0	0	0	2	0	116	0	0	0.96	Root;Bacteria;Proteobacteria;Betaproteobacteria;Burkholderiales;Burkholderiaceae	TGGGGAATTTTGGACAATGGGCGAAAGCCTGATCCAGCAATGCCGCGTGTGTGAAGAAGGCCTTCGGGTTGTAAAGCACTTTTGTCCGGAAAGAAATCCCTTGCCCTAATATGGCGGGGGATGACGGTACCGGAAGAATAAGCACCGGCTAACTACGT
965	0	0	0	0	0	0	1	0	0	0.91	Root;Bacteria;Proteobacteria;Gammaproteobacteria;Enterobacteriales;Enterobacteriaceae;Shigella	TGGGGAATATTGCACAATGGGCGCAAGCCTGATGCAGCCATGCCGCGTGTATGAAGAAGGCCTTCGGGTTGTAAAGTACTTTCAGCGGGGATGAAGGGAGTAAAGTTAATACCTTTGCTCATTGACATTAGCTGCAGAATAAGCACCGGCTAACTCTGT
966	0	0	0	0	0	1	0	0	0	0.94	Root;Bacteria;Actinobacteria;Actinobacteria;Actinobacteridae	TGGGGAATATTGCACAATGGGCGCAAGCCTGATGCAGCGACGCCGCGTGCGGGATGACGGCCTTCGGGTTGTAAACCGCTTTTGATTGGGAGCAAGCCTTCGGGTGAGTGTACCTTATGAGAAAGCCACGGCTAACTACGT
967	0	0	0	0	0	3	0	0	0	0.99	Root;Bacteria;Bacteroidetes	TGAGGAATATTGGTCAATGGAGGCAACTCTGAACCAGCCATGCCGCGTGCAGGAATAAGGTCCTATGGATTGTAAACTGCTTTTGTATAGGAAGAAACCATCCCTTGCGAGGGATCTTGACGGTACTATACGAATAAGGATCGGCTAACTCCGT
968	0	0	0	0	0	1	0	0	3	0.99	Root;Bacteria;Bacteroidetes;Bacteroidetes;Bacteroidales;Prevotellaceae	TGGGGAATATTGGTCAATGGGCGAGAGCCTGAACCAGCCAAGTAGCGTGCAGGATGACGGCCCTATGGGTTGTAAACTGCTTTTATACGGGGATAAAGTGAGTCACGTGTGGCTTATTGCAGGTACCGTATGAATAAGGACCGGCTAATTCCGT
969	1	0	0	0	0	2	0	0	0	1	Root;Bacteria;Firmicutes;"Bacilli";"Lactobacillales";"Aerococcaceae";Facklamia	TAGGGAATCTTCCGCAATGGACGCAAGTCTGACGGAGCAACGCCGCGTGTGTGAAGAAGGTTTTCGGATCGTAAAGCACTGTTATTAGAGAAGAATAGCCGATAGAGTAACTGTTATCGGTTTGACGGTATCTAACCAGAAAGTGACGGCTAACTACGT
970	0	0	0	0	0	1	0	0	0	0.84	Root;Bacteria;Actinobacteria;Actinobacteria;Coriobacteridae;Coriobacteriales;Coriobacterineae;Coriobacteriaceae	TGGGGAATATTGCGCAATGGGGGAAACCCTGACGCAGCGACGCCGCGTGCGGGGACGAAGGCCCTCGGGTCGCAGACCGCTTTCAGCGGGGAGGATCGTGACCGTACCCGCAGAAGAAGCCCCGGCTAACTACGT
971	0	0	9	0	0	0	0	0	0	0.9	Root;Bacteria;Firmicutes;"Bacilli";Bacillales	TAGGGAATCTTCCGCAATGGACGCAAGTCTGACGGAGCAACGCCGCGTGAGTGACGAAGGTTTTCGGATCGTAAAGCTCTGTTGTGAGGGAAGAACAAGGATAGGAGTCACTGTCTATCCCTTGACGGTACCTCACCAGAAAGCCACGGCTAACTACGT
972	0	0	0	0	0	0	0	0	1	1	Root;Bacteria	TCGGGAATATTGCACAATGGAGGAAACTCTGATGCAGTGACGCCGCGTATAGGAAGAAGGTTTTCGGATTGTAAACTATTTTAGACAGGGAAGAATAAAGACGGTACCTGTAGAATAAGCCCCGGCTAACTATGT
973	0	0	144	0	0	0	0	0	0	0.81	Root;Bacteria;Firmicutes;"Clostridia";Clostridiales;Incertae Sedis XI	TGGGGAATATTGCACAATGGAGGAAACTCTGATGCAGCGACGCCGCGTGAGCGATGAAGGTCTTCGGATCGTAAAGCTCTGTCCTAAGGGAAGATAGTGACGGTACCTTAGGAGGAAGCCCCGGCTAACTACGT
974	0	0	0	0	0	0	0	0	1	0.92	Root;Bacteria;Firmicutes;"Clostridia";Clostridiales	TGGGGAATATTGCACAATGGGCGAAAGCCTGATGCAGCAACGCCGCGTGAGCGAAGAAGGTCTTCGGATCGTAAAGCTCTGTCCTTGGGGAAGATAATGACGGTACCCTTGGAGGAAGCCCCGGCTAACTACGT
975	0	2	0	0	0	0	2	0	0	0.87	Root;Bacteria;Proteobacteria;Gammaproteobacteria;Legionellales;Legionellaceae;Legionella	TGGGGAATATTGGACAATGGGGGCAACCCTGATCCAGCAATGCCGCGTGTGTGAAGAAGGCCTGAGGGTTGTAAAGCACTTTCAGTGGGGAGGAGGATTGCCAGGTTAAGAGCTAGGTAATTGGACGTTACCCACAGAAGAAGCACCGGCTAACTCCGT
976	0	0	0	0	0	0	1	0	0	0.93	Root;Bacteria	GCGTAGACAGCGTAGACACGATGAAAACCGGCGAGACGGACATGGGCGGTAGTTTACCGAAAACCCATGCGTCTCGCCGGTCACTGAAAGGGGGCGGATCGCCGTGCTCCGCGTCCGTCGTGCTCCGCGGTTCAGACGGTGC
977	0	0	0	0	0	0	0	0	1	0.86	Root;Bacteria;Bacteroidetes;Bacteroidetes;Bacteroidales;Prevotellaceae;Prevotella	TGAGGAATATTGGTCAATGGCCGCGAGGCTGAACCAGCCAAGTAGCGTGCAGGATGACGGCCCTATGGGTTGTAAACTGCTTTTATGCGGGGATAAAGTGACGTACGTGTGCGTTTTTGCAGGTACCGCATGAATAAGGACCGGCTAATTCCGT
978	0	0	0	0	0	0	0	4	0	0.89	Root;Bacteria;Bacteroidetes;Bacteroidetes;Bacteroidales;Prevotellaceae;Prevotella	TGAGGAATATTGGTCAATGGGCGGAAGCCTGAACCAGCCAAGTAGCGTGCAGGAAGACGGCCCTATGGGTTGTAAACTGCTTTTAAGCGGGGATAAAGTCAGGGACGTGTCCCTGTTTGCAGGTACCGCTTGAATAAGGACCGGCTAATTCCGT
979	0	0	0	0	0	0	51	0	0	0.8	Root;Bacteria;Proteobacteria;Betaproteobacteria;Burkholderiales;Burkholderiaceae;Polynucleobacter	TGGGGAATTTTGGACAATGGGGGAAACCCTGATCCAGCAATGCCGCGTGAGTGAAGAAGGCCTTCGGGTTGTAAAGCTCTTTTGTCAGGGAAGAAACACCGGCTCTAACACAGTCCGGGAATGACGGTACCTGAAGAATAAGCACCGGCTAACTACGT
980	0	0	0	0	0	0	2	0	0	0.91	Root;Bacteria;Proteobacteria;Gammaproteobacteria;Enterobacteriales;Enterobacteriaceae;Shigella	TGGGGAATTTTGGACAATGGGGGCAACCCTGATCCAGCCATGCCGCGTGTATGAAGAAGGCCTTCGGGTTGTAAAGTACTTTCAGCGGGGAGGAAGGGAGTAAAGTTAATACCTTTGCTCATTGACGTTACCCGCAGAAGAGGCACCGGCTAACTCCGT
981	0	0	0	0	0	0	0	3	0	1	Root;Bacteria;Bacteroidetes;Bacteroidetes;Bacteroidales;Porphyromonadaceae;Parabacteroides	TGAGGAATATTGGTCAATGGCCGAGAGGCTGAACCAGCCAAGTCGCGTGAAGGATGAAGGATCTATGGTTTGTAAACTTCTTTTATAGGGGAATAAAGTGTGGGACGTGTCCCATTTTGTATGTACCCTATGAATAAGCATCGGCTAACTCCGT
982	0	0	0	0	0	0	0	0	1	1	Root;Bacteria	TGGGGAATATTGGGCAATGGGCGAAAGCCTGACCCAGCGACGCCGCGTGAGGGAAGAAGGTCTTCGGATTGTAAACCTTTGTAGACAGGGAAGAAGAAAGTGACGGTACCTGTAAAGTAAGCCACGGCTAACTACGT
983	0	0	0	0	0	0	1	0	0	0.9	Root;Bacteria;Proteobacteria;Betaproteobacteria	TGGGGAATTTTGGACAATGGGCGAAAGCCTGATCCAGCAATGCCGCGTGCAGGATGAAGGCCTTCGGGTTGTAAAGCTCTTTCGCAAGGGAAGAAAACTTAGGCGCTAATATCGCTTGAGGTTGACGGTACCTTGATAAGAAGCACCGGCTAACTACGT
984	0	0	0	0	0	1	0	0	0	0.97	Root;Bacteria	CAAGGAATTTTCCACAATGGGCGCAAGCCTGATGGAGCAACGCCGCGTGTGGGAGGACGCCCTTCGGGGTGTAAACCACTTTTCCACGGGACGAAGGTAATGACGGTACCGTGGGCAATAAGGCCCGGCTAACTACGT
985	0	0	0	0	0	0	0	0	1	1	Root;Bacteria	CTAAGAATCTTCCACAATGGACGAAAGTCTGATGGAGCGACGCCGCGTGGACGATGAAGGCCGTGAGGTTGTAAAGTCCTTTTCGTGTAGAGGAACAAGCAGAGGAGGGAATGCCTTTGCGGTGACGTTAAACACGGAATAAGCCCCGGCTAACTACGT
986	0	0	0	0	0	0	0	3	0	1	Root;Bacteria;Firmicutes;"Bacilli";"Lactobacillales";Streptococcaceae;Lactococcus	TAGGGAATCTTCGGCAATGGACGAAAGTCTGACCGAGCAACGCCGCGTGAGTGAAGAAGGTTTTCGGATCGTAAAACTCTGTTGGTAGAGAAGAACGTTGGTGAGAGTGGAAAGCTCATCAAGTGACGGTAACTACCCAGAAAGGGACGGCTAACTACGT
987	0	0	0	0	0	0	0	0	3	0.94	Root;Bacteria;Bacteroidetes	TGAGGAATATTGGTCAATGGGCGAGAGCCTGAACCAGCCAAGTCGCGTGAGGGAAGACGGTCCTATGGATTGTAAACCTCTTTTGTCGGGGAGCAAAGAGGCCTCGTGAGGTCAAAAGTGAGAGTACCCGAAGAAAAAGCATCGGCTAACTCCGT
988	0	0	0	0	5	2	0	0	0	1	Root;Bacteria	TGGGGAATCTTGCGCAATGGGCGAAAGCCTGACGCAGCAACGCCGCGTGAGGGAAGAAGGCCTTCGGGTTGTAAACCTCTTTCAGTGGGGACGAAGCCTCCTTCGGGGGGTGACGGTACCCGCACAAGAAGCACCGGCTAACTACGT
989	0	0	0	0	0	1	0	0	0	0.84	Root;Bacteria;Firmicutes;"Bacilli";Bacillales	TAGGGAATCTTCCGCAATGGACGAAAGTCTGACGGAGCAACGCCGCGTGAGTGAGGAAGGTTTTCGGATCGTAAAGCTCTGTTGTTGGTGAAGAATCCTTTTGTCAGGAAATGGGCAGAAGTTGACGGTAGCCAACCAGAAAGCCCCGGCTAACTACGT
990	0	0	0	0	58	0	0	4	1	0.98	Root;Bacteria;Firmicutes;"Clostridia";Clostridiales;"Lachnospiraceae"	TGGGGAATATTGCACAATGGAGGAAACTCTGATGCAGCGACGCCGCGTGAGTGAAGAAGTATTTCGATATGTAAAGCTCTATCAGCAGGGAAGAAGATGACGGTACCTGACTAAGAAGCACCGGCTAAATACGT
991	0	0	0	0	0	0	0	0	2	0.88	Root;Bacteria	TAGGGGATATTGGGCAATGGGGGCAACCCTGACCCAGCCATGCCGCGTGAGGGAATGAGGCCCTACGGGTCGTGAACCTCTCTTGACCGGGGACAATGTCCCGCACGAGATGCGGGATTGAGGGTACCGGTGGAATAAGCATCGGCTAACTCCGT
992	0	0	0	0	0	0	0	0	2	0.97	Root;Bacteria	TGGGGAATATTGGGCAATGGGCGCAAGCCTGACCCAGCAACGCCGCGTGAGGGAAGAAGGTTTTCGGATTGTAAACCTCTGTCGCAGAAGACGAAGGAAGTGACGGTAATCTGTGAGGAAGCCCCGGCTAACTACGT
993	0	0	0	0	0	0	0	0	1	0.84	Root;Bacteria;Actinobacteria;Actinobacteria	TGGGGAATATTGCGCAATGGGGGAAACCCTGACGCAGCAACGCCGCGTGCGGGATGAAGGCTTTCGGGTTGTAAACCGCTTTCAGCAGGGAAGATAATGACGGTACCTGCAGAAGAAGCCCCGGCTAACTACGT
994	0	0	0	0	0	0	0	0	1	0.9	Root;Bacteria;Bacteroidetes;Bacteroidetes;Bacteroidales	TGAGGAATATTGGTCAATGGGCGGGAGCCTGAACCAGCCAAGTCGCGTGAAGGAAGAAGGTACTTAGTATTGTAAACTTCTTTTGTCAGGGAACAAAAGTGAGGACGTGTCCTCATATGAGTGTACCTGAAGAAAAAGCATCGGCTAACTCCGT
995	0	0	0	0	0	0	11	0	0	1	Root	GCGCGCAAATTACCCAATCCTGACACGGGGAGGTAGTGACAATAAATAACAATACCGGGCTCTATGAGTCTGGTAATTGGAATGAGTACAATCTAAATCCCTTAACGAGGATCCATTGGAGGGCAAGTCTGGT
996	0	0	0	0	3	1	0	0	0	0.89	Root;Bacteria;Actinobacteria;Actinobacteria;Actinobacteridae;Actinomycetales;Pseudonocardineae	TGGGGAATCTTGCACAATGGGCGAAAGCCTGATGCAGCGACGCCGCGTGAGGGATGACGGCCTTCGGGTTGTAAACCTCTTTCGCCAGGGACGAAGGGTGACTGACGGTACCTGGATAAGAAGCACCGGCTAACTACGT
997	0	0	0	0	1	0	0	0	0	0.98	Root;Bacteria;Firmicutes;"Clostridia";Clostridiales;"Lachnospiraceae"	TGGGGAATATTGGACAATGGGCGAAAGCCTGATCCAGCGACGCCGCGTGAGCGAAGAAGTATTTCGGTATGTAAAGCTCTATCAGCAGGGAAGAAAACGACGGTACCTGACTAAGAAGCCCCGGCTAACTACGT
998	0	0	0	0	0	1	0	0	0	0.92	Root;Bacteria;Bacteroidetes;Bacteroidetes;Bacteroidales;Prevotellaceae	TGGGGAATATTGCACAATGGGCGAGAGCCTGAACCAGCCAAGTAGCGTGCAGGATGACGGCCCTATGGGTTGTAAACTGCTTTTATAAGGGAATAAAGTGGGAGTCGTGACTCTTTTGCATGTACCTTATGAATAAGGACCGGCTAATTCCGT
999	0	0	0	0	0	0	0	1	0	0.8	Root;Bacteria;Firmicutes	TGGGGAATATTGGGCAATGGGCGCAAGCCTGACCCAGCAACGCCGCGTGAAGGAAGAAGGCTTTCGGGTTGTAAACTTCTTTTATCAGGGACGAAATAAATGACGGTACCTGAAGAATAAGCCACGGCTAACTACGT
1000	0	0	0	9	0	0	0	0	0	0.98	Root;Bacteria;Firmicutes;"Bacilli";Bacillales	TAGGGAATCATCCGCAATGGACGAAAGTCTGACGGTGCAACGCCGCGTGAGTGATGAAGGTCTTCGGATCGTAAAGCTCTGTTGTCAGCGAAGAACAGGTGCCATAGGTAATGATGGCACTTTGACGGTATCTGACCAGAAAGCCCCGGCTAACTACGT
1001	0	0	0	0	2	0	0	0	0	1	Root;Bacteria	TGGGGAATATTGGGCAATGGGCGAAAGCCTGACCCAGCAACGCCGCGTGAGTGAAGAAGGCTTTCGGGTTGTAAAGCTCTGTCCTAGGGGGACGAAGGAAGTGACGGTACCCTGGGAGGAAGCCCTGGCTAACTACGT
1002	0	0	0	0	2	2	0	0	0	0.88	Root;Bacteria;Firmicutes;"Bacilli";Bacillales;Bacillaceae;"Bacillaceae 2";Oceanobacillus	TAGGGAATCTTCCGCAATGGACGAGAGTCTGACGGAGCAACGCCGCGTGAGTGATGAAGGTTTTCGGATCGTAAAACTCTGTTGTTAGGGAAGAACAGTATGATAGTAACTGATCATACCTTGACGGTACCTAACCAGAAAGCCACGGCTAACTACGT
1003	0	0	0	0	8	1	0	0	1	0.9	Root;Bacteria;Bacteroidetes;Bacteroidetes;Bacteroidales;Prevotellaceae;Prevotella	TGAGGAATATTGGTCAATGGACGGAAGTCTGAACCAGCCAAGTAGCGTGCAGGAAGACGGCCCTATGGGTTGTAAACTGCTTTTATGTGGGAATAAAGTGAGGGACGTGTCCCTTTTTGTAGGTACCACCTGAATAAGGACCGGCTAATTCCGT
1004	0	0	0	0	0	0	0	0	2	1	Root;Bacteria	TGAGGAATATTGGACAATGGAAGGAATTCTGATCCAGCCATGCCGCGTGCGGGAGGACGGCCCTATGGGTTGTAAACCGCTTTTGTCGGGGAGCAATAAGGTCCACGTGTGGACTGATGAGAGTACCTGGCGAATAAGCATCGGCTAACTCCGT
1005	0	0	0	0	0	0	0	0	1	0.85	Root;Bacteria;Bacteroidetes;Bacteroidetes;Bacteroidales;Prevotellaceae;Prevotella	TGAGGAATATTGGTCAATGGGCGAGAGCCTGAACCAGCCAAGTAGCGTGAAGGATGACGGCCCTATGGGTTGTAAACTTCTTTTATGCGGGAATAAAGTGCGCCACGTGTGGCGCTTTGCATGTACCGCAAGAAAAAGCACCGGCTAATTCCGT
1006	0	0	5	0	0	0	0	0	0	0.98	Root;Bacteria;Firmicutes;"Bacilli";Bacillales;Bacillaceae	TAGGGAATCTTCCGCAATGGACGAAAGTCTGACGGAGCGACGCCGCGTGAGTGATGAAGGTCTTCGGATCGTAAAACTCTGTTGTTAGGGAAGAACAAGTATCGACTGAATAGGTCGGTACCTTGACGGTACCTAACCAGAAAGCCCCGGCTAACTACGT
1007	0	0	0	0	0	0	0	0	3	0.98	Root;Bacteria;Bacteroidetes;Bacteroidetes;Bacteroidales	TGAGGAATATTGGTCAATGGGCGGAAGCCTGAACCAGCCAAGTAGCGTGAGGGACGACTGCCCTATGGGTTGTAAACCTCTTTTATAAGGGAATAAAATACGGGACGTGTCCTGTTTTGCATGTACCTTATGAATAAGGACCGGCTAATTCCGT
1008	0	0	0	0	7	1	0	0	0	0.98	Root;Bacteria;Proteobacteria;Betaproteobacteria;Burkholderiales	TGGGGAATTTTGGACAATGGGGGCAACCCTGATCCAGCCATGCCGCGTGCGGGAAGAAGGCCTTCGGGTTGTAAACCGCTTTTGTCAGGGACGAAAAGGGACGGGTTAAGAGCTAGTTCCGCTGACGGTACCTGAAGAATAAGCACCGGCTAACTACGT
1009	0	0	0	0	0	0	37	0	0	1	Root;Bacteria;Proteobacteria;Gammaproteobacteria;Enterobacteriales;Enterobacteriaceae	TGGGGAATATTGCACAATGGGCGCAAGCCTGATGCAGCCATGCCGCGTGTATGAAGAAGGCCTTCGGGTTGTAAAGTACTTTCAGCGGGGAGGAAGGTGTTGTGGTTAATAACCACAGCAATTGACGTTACCCGCAGAAGAAGCACCGGCTAACTCCGT
1010	0	0	0	0	0	0	0	0	1	0.84	Root;Bacteria	TAAGGGATATTGGTCAATGGGGGGAACCCTGAACCAGCCATGCCGCGTGAGGGAATGAGGCCCTACGGGTCGTGAACCTCTTTTATTCGGGGACAACGGCGGCGTCGTGAACGCCGCGTGAGGGTACCGAAGGAATAAGCGTCGGCTAACTCCGT
1011	0	0	0	0	0	0	1	0	0	0.86	Root;Bacteria;Proteobacteria;Alphaproteobacteria;Rhodobacterales;Rhodobacteraceae	TGGGGAATCTTAGACAATGGGGGCAACCCTGATCTAGCCATGCCGCGTGAGTGATGAAGGCCTTAGGGTCGTAAAGCTCTTTCAGCTGGGAAGATAATGACAGTACCGGGAGAATAAGCTCCGGCTAACTCCGT
1012	0	0	1	0	0	0	0	0	0	1	Root;Bacteria;Firmicutes;"Bacilli";Bacillales	TAGGGAATCTTCCGCAATGGACGCAAGTCTGACGGAGCGATGCCGCGTGAGTGATGAAGGTCTTCGGATTGTAAAACTCTGTTGTTAGGGAAGAACACGTACGAGTGTAACTGCTCGTACCTTGACGGTACCTAACCAGAAAGCCCCGGCTAACTACGT
1013	0	0	0	0	0	1	0	0	0	1	Root;Bacteria	CAGGGAATCTTGGGCAATGGGCGAAAGCCTGACCCAGCGACGTCGCGTGGAGGAAGAAGGCCTTCGGGCTGTAAACTCCTTTTCCAAGGGAAGAGTAAGGACGGTACCTTGGGAATAAGCTCCGGCTAACTACGT
1014	0	0	0	0	10	0	0	0	0	0.91	Root;Bacteria;Firmicutes;"Clostridia";Clostridiales	TGGGGAATATTGGGCAATGGGCGAAAGCCTGACCCAGCGACGCCGCGTGAGGGAAGACGGTCTTCGGATTGTAAACCTTTGTTGATGGGGACGAAGAAAGTGACGGTACCCATCGAGGAAGCCACGGCTAACTACGT
1015	0	0	0	0	0	0	0	1	0	1	Root;Bacteria	TGGGGGATATTGGTCAATGGGGGAAACCCTGAACCAGCAATGCCGCGTGAGGGAAGAAGGTCTTCGGATTGTAAACCTAAGTAGTCAGGGACGAAAGAAATGACGGTACCTGAAGAGTAAGCTCCGGCTAACTACGT
1016	0	0	0	0	0	1	0	0	0	0.93	Root;Bacteria;Bacteroidetes;Bacteroidetes;Bacteroidales	TGGGGAAGTATTGGTCAATGGACGAGAGTCTGAACCAGACAAGTAGCGTGCAGGATGACGGCCCTATGGGTTGTAAACTGCTTTTATAAGGGAATAAAGTGGGTCACGTGTGACTTTTTGCATGTACCTTATGAATAAGGACCGGCTAATTCCGT
1017	0	0	0	0	0	0	82	0	0	0.87	Root;Bacteria;Bacteroidetes	TAAGGAATATTGGACAATGGGCGAAAGCCTGATCCAGCCATGCCGCGTGAAGGATTAAGGTCCTCTGGATTGTAAACTTCTTTTATTTGGGACGAAAAAAGGGAATTCTTTCCCACTTGACGGTACCAAGTGAATAAGCACCGGCTAACTCCGT
1018	5	0	52	24	0	0	65	0	0	0.99	Root;Bacteria;Proteobacteria;Alphaproteobacteria;Rhizobiales;Bradyrhizobiaceae	TGGGGAATATTGGACAATGGGCGCAAGCCTGATCCAGCCATGCCGCGTGAGTGATGAAGGCCCTAGGGTTGTAAAGCTCTTTTGTGCGGGAAGATAATGACGGTACCGCAAGAATAAGCCCCGGCTAACTTCGT
1019	0	0	0	0	0	0	1	0	0	0.85	Root;Bacteria;Proteobacteria;Gammaproteobacteria;Pseudomonadales;Moraxellaceae;Acinetobacter	TGGGGAAGTATTGGACAATGTGCGAAAGCCTGATCCAGCCATGCCGCGTGTGTGAAGAAGGCCTTATGGTTGTAAAGCACTTTAAGCGAGGAGGAGGCTCTCTTGGTTAATACCCAAGATGAGTGGACGTTACTCGCAGAATAAGCACCGGCTAACTCTGT
1020	0	0	0	0	0	0	7	0	0	0.91	Root;Bacteria;Bacteroidetes;Flavobacteria;Flavobacteriales;Flavobacteriaceae	TGAGGAATATTGGACAATGGGCGCAAGCCTGATCCAGCCATGCCGCGTGCAGGATGAAGCATCTATGGTGTGTAAACTGCTTTTATACGGGAAGAAACCCTGGCTCGTGAGCCAGACTGACGGTACCGTAGGAATAAGGATCGGCTAACTCCGT
1021	0	0	0	0	2	0	0	0	0	1	Root;Bacteria;Firmicutes;"Bacilli";Bacillales	TAGGGAATCTTCCGCAATGGACGAAAGTCTGACGGAGCAACGCCGCGTGAGTGATGAAGGTTTTCGGATCGTAAAGCTCTGTTGTTAGGGAAGAACACGTACCAGTTAACTGCTGGTACCTTGACGGTACCTAACCAGAAAGCCACGGCTAACTACGT
1022	0	0	0	0	0	0	2	0	0	1	Root;Bacteria;Proteobacteria;Deltaproteobacteria;Bdellovibrionales;Bacteriovoracaceae;Peredibacter	TAGGGAATATTGCGCAATGGGGGAAACCCTGACGCAGCAACGCCGCGTGAGTGAGGAAGGTCTTCGGATTGTAAAACTCTTTTGCTAGGGAAAAATGTACATGGAGCTAATACCCCATGTTTTGATGGTACCTAAAGAATAAGGACCGGCTAACTTCGT
1023	0	0	0	0	0	0	1	0	0	0.88	Root;Bacteria;Proteobacteria;Alphaproteobacteria;Caulobacterales;Caulobacteraceae	ACGGAGTTAGCCGGGGCTTATTCTCTGGGTACTGTCATTATCATCCCCAGTAAAAGAGCTTTACAATCCTAAGACCTTCATCATTCACGCGGCATGGCTGCGTCAGGCTTTCGCCCATTGCGCAAGATTCCTAA
1024	0	0	0	0	0	0	0	0	1	0.92	Root;Bacteria;Firmicutes;"Clostridia";Clostridiales	TGGGGAATATTGCACAATGGGCGCAAGCCTGATGCAGCGATGCCGCGTGAAGGAAGAAGGTTTTCGGATTGTAAACTCTTGTCTTAAGGGACGATAATGACGGTACCTTAGGAGGAAGCTCCGGCTAACTACGT
1025	0	0	0	0	0	10	0	0	0	0.88	Root;Bacteria;Firmicutes;"Clostridia";Clostridiales;"Peptostreptococcaceae";"Peptostreptococcaceae Incertae Sedis"	TGGGGAAGTATTGCACAATGGGCGGAAAGACCTGATGCAGCAACGCCGCGTGAGCGATGAAGGCCTTCGGGTCGTAAAGCTCTGTCCTCAAGGAAGATAATGACGGTACTTGAGGAGGAAGCCCCGGCTAACTACGT
1026	0	0	0	0	0	0	1	0	0	0.97	Root;Bacteria;Proteobacteria;Gammaproteobacteria	TGGGGAATATTGGACAATGGGCGAAAGCCTGATCCAGCCATGCCGCGTGTGTGAAGAAGGTCTTCGGATTGTAAAGCACTTTAAGTTGGGAGGAAGGGCGTAAAGTTAATACCTTTGCTCATTGACGTTACCCGCAGAAGAAGCACCGGCTAACTCCGT
1027	0	0	0	0	0	0	0	0	1	1	Root;Bacteria	TGAGGGATATTGCACAATGGGCGCAAGCCTGATGCAGCAACGCCGCGTGAAGGATGACGGTTTTCGGATTGTAAACTTCTGTTCGGGATGAAGATAATGACATTAGTCCCGGAGCAAGCCACGGCTAACTACGT
1028	0	0	0	0	0	0	0	0	3	0.98	Root;Bacteria;Firmicutes;"Clostridia";Clostridiales;"Ruminococcaceae"	TGGGGGATATTGCACAATGGGCGAAAGCCTGATGCAGCGACGCCGCGTGAGGGAAGACGGTTTTCGGATTGTAAACCTCTGTCTTCGGGGACGAAAATGACGGTACCCGAGGAGGAAGCCACGGCTAACTACGT
1029	0	0	0	0	0	0	0	0	1	0.9	Root;Bacteria;Bacteroidetes;Bacteroidetes;Bacteroidales;Prevotellaceae;Prevotella	TGAGGAATATTGGTCAATGGACGAGAGTCTGAACCAGCCAAGTAGCGTGCAGGATGACTGCCCTATGGGTTGTAAACTGCTTTTATGCGGGAATAAAGTCAGGTACGTGTACCTGTTTGTATGTACCGCATGAATAAGGACCGGCTAATTCCGT
1030	1	0	0	3	0	6	0	0	0	0.98	Root;Bacteria;Firmicutes;"Bacilli";Bacillales;Bacillaceae;"Bacillaceae 1";Bacillus;Bacillus c	TAGGGAATCTTCCGCAATGGACGAAAGTCTGACGGAGCAACGCCGCGTGAGCGATGAAGGCCTTCGGGTCGTAAAGCTCTGTTGTTAGGGAAGAACAAGTACCGGAGTAACTGCCGGTACCTTGACGGTACCTAACCAGAAAGCCACGGCTAACTACGT
1031	0	0	0	0	0	1	0	0	0	1	Root;Bacteria	TGGGGAATATTGCACAATGGGCGCAAGCCTGATGCAGCGACGCCGCGTGAGGGATGGAGGCCTTCGGGTTGTAAACCTCTTTTGTTAGGGAGCAAGGAAATGACGTTACCCTCAGAAGAAGCACCGGCTAACTCCGT
1032	0	0	0	0	0	0	0	2	0	0.94	Root;Bacteria;Firmicutes;"Clostridia";Clostridiales	TGGGGAATATTGCACAATGGGCGAAAGCCTGATGCAGCAACGCCGCGTGAGGGATGAAGGCCTTCGGGTCGTAAACCTCTGTCCTTGGGGAAGAAACAAATGACGGTACCCATGGAGGAAGCCCCGGCTAACTACGT
1033	0	0	0	0	0	0	0	0	2	1	Root;Bacteria	TGGGGAATATTGGGCAATGGGCGCAAGCCTGACCCAGCAACGCCGCGTGAGGGAAGAAGGTTTTCGGATCGTAAACCTCTGTTGTAGGGGACGAGGAGTAGACGGTACCCTACGAGGAAGCTCCGGCTAACTACGT
1034	0	0	0	0	0	2	0	0	0	0.96	Root;Bacteria;Firmicutes;"Bacilli";"Lactobacillales";Lactobacillaceae;Lactobacillus	TAGGGGAATCTTCCACAATGGACGCAAGTCTGATGGAGCAACGCCGCGTGAGTGAAGAAGGGTTTCGGCTCGTAAAGCTCTGTTGGTAGTGAAGAAAGATAGAGGTAGTAACTGGCCTTTATTTGACGGTAATTACCTAGAAAGTCACGGCTAACTACGT
1035	0	0	0	0	0	2	0	0	0	0.85	Root;Bacteria;Proteobacteria;Alphaproteobacteria;Rhodospirillales;Rhodospirillaceae	TGGGGAATATTGGACAATGGGCGCAAGCCTGATCCAGCAATGCCGCGTGAGTGATGAAGGCCTTCGGGTTGTAAAGCTCTTTCGCACGCGACGATGATGACGATAGCGTGAGAAGAAGCCCCGGCTAACTTCGT
1036	0	0	0	0	0	1	0	0	0	0.92	Root;Bacteria;Bacteroidetes;Flavobacteria;Flavobacteriales;Flavobacteriaceae	TGAGGAATATTGGTCAATGGAGGCAACTCTGAACCAGCCATGCCGCGTGCAGGATGACGATCCTATGGATTGTAAAACTGCTTTTGTACAGGAAGAAATGCAATTACGTGTAGTTGTTTGACGGTACTGTAAGAATAAGGACCGGCTAACTCCGT
1037	0	0	0	0	2	0	0	0	0	1	Root;Bacteria	TGGGGAATATTGGGCAATGGGCGAAAGCCTGACCCAGCAACGCCGCGTGAAGGAAGAAGGTCTTCGGATTGTAAACTTTTGTCTTATGGGGACGATAATGACGGTACCATAGGAGGAAGCCACGACTAACTACGT
1038	0	0	0	0	5	1	0	0	0	0.96	Root;Bacteria;Bacteroidetes;Bacteroidetes;Bacteroidales;Prevotellaceae	TGAGGAATATTGGTCAATGGGCGAGAGCCTGAACCAGCCAAGTAGCGTGCAGGATGACGGCCCTATGGGTTGTAAACTGCTTTTATAAGGGATAAAGTTAGAGTCGTGACTCTTTTTGTATGTACCTTATAAATAAGGACCGGCTAATTCCGT
1039	0	0	0	0	0	15	0	0	0	0.82	Root;Bacteria;Actinobacteria;Actinobacteria;Actinobacteridae	TGGGGAATATTGCACAATGGGCGCAAGCCTGATGCAGCGACGCCGCGTGCGGGATGACGGCCTTCGGGTTGTAAACCGCTTTTGGTAGGGAGCAAGGCGCTTTTGGCGTTGAGTGTACCTGTCGAATAAGCACCGGCTAACTACGT
1040	0	0	0	0	0	0	0	1	0	1	Root;Bacteria	TAGGGAATATTGGGCAATGGGGGCAACCCTGACCCAGCAACGCCGCGTGAGGGAAGAAGGTTCTCTGGATTGTAAACCTCTGTCCTATGGGACGAAGAAGTGACGGTACCATAGGAGGAAGCCCCGGCTAACTACGT
1041	0	0	0	0	0	0	0	1	0	0.98	Root;Bacteria	TGGGGGATATTGCACAATGGGGGAAACCCTGATGCAGCAATGCCGCGTGAGGGAAGAAGGTCTTCGGATTGTAAACCTAAGTAGCCCGGGACGATAATGACGGTACCTGGAGAGTAAGCTCCGGCTAACTACGT
1042	0	0	0	0	0	0	0	1	0	0.98	Root;Bacteria;Firmicutes;"Clostridia";Clostridiales	TGGGGAATATTGCACAATGGAGGAAACTCTGATGCAGCGACGCCGCGTGAGGGAAGAAGGTTTTCGGATTGTAAACCTCTGTCTTTGGTGACGAAAATGACGGTAGCCAAGGAGGAAGCTCCGGCTAACTACGT
1043	0	0	0	0	0	0	4	0	0	1	Root;Bacteria;Cyanobacteria;Cyanobacteria;Chloroplast;Streptophyta	ACAGAGTTAGCCGATGCTTATTCCTCAGATACCGTCATTGCTTCTTCTCCGGGAAAAGAAGTTCACGACCCGTGGGCCTTCTACCTCCACGCGGCATTGCTCCGTCAGGCTTTCGCCCATTGCGGAAAATTCCCCA
1044	0	0	0	0	0	0	0	0	1	0.86	Root;Bacteria;Bacteroidetes	TGAGGAATATTGGTCAATGGGCGAAAGCCTGAACCAGCCATGCCGCGTGAAGGACTAAGGCCCTATGGGTCGTAAACTTCTTTAGGAGCAGAGCAATAAGGTTCACGTGTGGACCGATGAGAGTATGCTCAGAATAAGCATCGGCTAACTCCGT
